# Supplementary material for: Visible light-mediated oxidative quenching reaction to electron-rich epoxides: highly regioselective synthesis of α-bromo (di)ketones and mechanism study
Source: Royal Society of Chemistry journal article supplement (doi:10.1039/c3ob41245h), 2013-01-01

## Supplementary Information

For

# Visible light-mediated oxidative quenching reaction to electron-rich epoxides: highly regioselective synthesis of $\alpha$ -bromo (di)ketones and mechanism study

Lin Guo,<sup>†</sup> Chao Yang,<sup>†</sup> Lewei Zheng,<sup>†</sup> Wujiong Xia<sup>\*,†,‡</sup>

<sup>†</sup>State Key Lab of Urban Water Resource and Environment, the Academy of Fundamental and  
Interdisciplinary Sciences, Harbin Institute of Technology, Harbin 150080

<sup>‡</sup>State Key Lab of Applied Organic Chemistry, Lanzhou University, Lanzhou 730000, China

E-mail: [xiawj@hit.edu.cn](mailto:xiawj@hit.edu.cn)

## Contents

|                                                                    |         |
|--------------------------------------------------------------------|---------|
| 1. General Information                                             | S2      |
| 2. Preparation and Characterization of Substrates                  | S2-S7   |
| 3. General Procedure for Photocatalytic Reactions                  | S7      |
| 4. Mechanism Research                                              | S7-S11  |
| 5. Characterization of Products                                    | S11-S16 |
| 6. <sup>1</sup> H NMR and <sup>13</sup> C NMR Spectra for Products | S16-S52 |

## 1. General Information

All reagents were purchased from commercial sources unless otherwise noted. All reactions were monitored by TLC and visualized by UV lamp (254 nm)/or by treatment with a solution of 10 g phosphomolybdic acid and 100 mL EtOH followed by heating/or by staining with a solution of 12 g 2,4-dinitrophenylhydrazine in 60 mL conc. H<sub>2</sub>SO<sub>4</sub>, 80 mL H<sub>2</sub>O and 200 mL 95% EtOH followed by heating. Flash column chromatography was performed using 230-400 mesh silica gel. <sup>1</sup>H NMR (400 MHz) and <sup>13</sup>C NMR (100 MHz) spectra were obtained on Bruker AV-400 instrument. Chemical shifts for <sup>1</sup>H NMR spectra were reported in δ ppm referenced to an internal SiMe<sub>4</sub> standard. Chemical shifts for <sup>13</sup>C NMR spectra were reported in parts per million relative to the center line signal of the CDCl<sub>3</sub> triplet at 77.16 ppm. The abbreviations s, d, dd, t, q and m stand for the resonance multiplicity singlet, doublet, doublet of doublets, triplet, quartet and multiplet, respectively. HR-ESI-MS spectra were recorded on a Bruker Esquire LC mass spectrometer using electrospray ionization. GC-MS analysis was performed on a 7890A-5975C/Agilent.

## 2. Preparation and Characterization of Substrates

### 1) Synthesis of **1a-1c**, **1e-1m**, **1r**

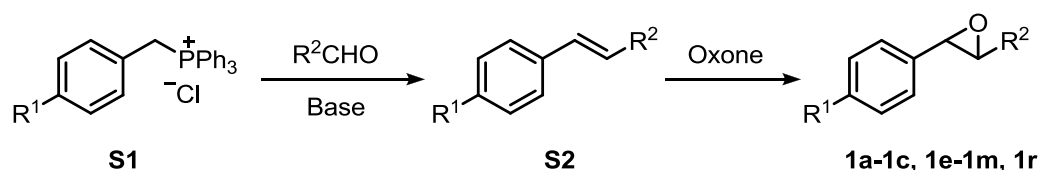

Substrates **1a-1c**, **1e-1m**, **1r** were prepared from the corresponding alkenes by using Oxone as epoxidation reagent. Take **1a** as an example. To a mixture of *p*-MeOC<sub>6</sub>H<sub>4</sub>CH<sub>2</sub>PPh<sub>3</sub>Cl (2.5 g, 5.98 mmol) and LiOH (195.7 mg, 8.15 mmol) in THF (40 mL) was added benzaldehyde (576.6 mg, 5.44 mmol). The reaction mixture was stirred at 70 °C for 5 h. The reaction mixture was cooled to r.t. and then quenched with water. The mixture was extracted with EtOAc (3 × 40 mL) and the combined organic layers were washed with brine, dried, filtered and concentrated *in vacuo*. The product was purified by recrystallization to afford (E)-1-methoxy-4-styrylbenzene

(S2) as white solid.

To a solution of **S2** (210.1 mg, 1.0 mmol) in acetone/acetonitrile (20 mL, 1:1) was added saturated NaHCO<sub>3</sub> solution (10 mL) and then cooled to 0 °C. To this solution was added a water solution (10 mL) of potassium monopersulfate triple salt (1.35 g, 2.2 mmol), the mixture was stirred for 5 h at 0 °C before it was quenched by water, and extracted with ethyl acetate (3 × 30 mL). The organic layer was washed with brine (50 mL), dried over anhydrous NaSO<sub>4</sub>, and concentrated *in vacuo*. The product was purified by column chromatography (hexanes: EtOAc = 30:1) to afford 205.7 mg (91%) of **1a** as white solid.

## 2) Synthesis of **1d**, **1n-1q**

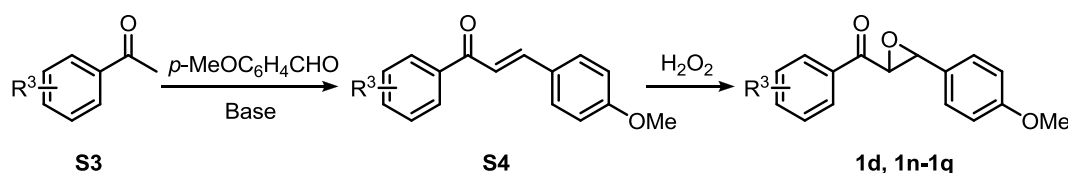

Substrates **1d**, **1n-1q** were prepared from the corresponding chalcones by utilizing H<sub>2</sub>O<sub>2</sub> as epoxidation reagent. Take **1d** as an example. To a mixture of *p*-MeOC<sub>6</sub>H<sub>4</sub>CHO (1.0 g, 7.35 mmol) and phenyl methyl ketone (882.7 mg, 7.35 mmol) in MeOH (15 mL) was added a 5N NaOH solution (4.5 mL, 22.05 mmol). The reaction mixture was stirred at r.t. for 2 h, and then the solvent was removed *in vacuo*. The mixture was extracted with EtOAc (3 × 20 mL) and the combined organic layers were washed with brine, dried, filtered and concentrated *in vacuo*. The product was purified by recrystallization or column chromatography to afford (E)-3-(4-methoxyphenyl)-1-phenylprop-2-en-1-one (**S4**) as yellow solid.

To a solution of **S4** (119 mg, 0.5 mmol) in MeOH (10 mL) was added a 5N NaOH solution (0.15 mL, 0.75 mmol) and hydrogen peroxide (30% in water, 0.15 mL). The reaction mixture was stirred at room temperature for 15 min and then the solvent was removed *in vacuo*. The mixture was extracted with EtOAc (3 × 10 mL), washed with brine, dried, filtered and concentrated *in vacuo*. The product was purified by column chromatography (hexanes: EtOAc = 16:1) to afford 108.0 mg (80%) of **1d** as white

solid.

### 3) Characterization of **1a – 1r**

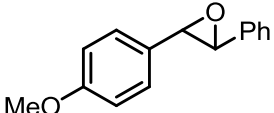 **trans-2-(4-methoxyphenyl)-3-phenyloxirane (1a):**  $^1\text{H}$  NMR (400 MHz,  $\text{CDCl}_3$ ):  $\delta$  7.41 – 7.33 (m, 5H), 7.28 (d,  $J = 8.6$  Hz, 2H), 6.92 (d,  $J = 8.6$  Hz, 2H), 3.85 (d,  $J = 2.0$  Hz, 1H), 3.83–3.81 (m, 4H).  $^{13}\text{C}$  NMR (100 MHz,  $\text{CDCl}_3$ ):  $\delta$  159.9, 137.4, 129.3, 128.7, 128.4, 127.0, 125.6, 114.2, 62.9, 62.8, 55.5.

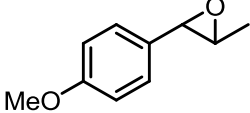 **trans-2-(4-methoxyphenyl)-3-methyloxirane (1b):**  $^1\text{H}$  NMR (400 MHz,  $\text{CDCl}_3$ ):  $\delta$  7.18 (d,  $J = 8.6$  Hz, 2H), 6.87 (d,  $J = 8.6$  Hz, 2H), 3.79 (s, 3H), 3.52 (d,  $J = 1.5$  Hz, 1H), 3.03 (qd,  $J = 5.1$ , 2.0 Hz, 1H), 1.43 (d,  $J = 5.2$  Hz, 3H).  $^{13}\text{C}$  NMR (100 MHz,  $\text{CDCl}_3$ ):  $\delta$  159.6, 129.8, 126.9, 117.0, 59.5, 58.8, 55.3, 17.9.

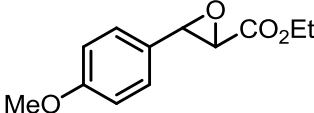 **ethyl trans-3-(4-methoxyphenyl)oxirane-2-carboxylate (1c):**  $^1\text{H}$  NMR (400 MHz,  $\text{CDCl}_3$ ):  $\delta$  7.21 (d,  $J = 8.7$  Hz, 2H), 6.89 (d,  $J = 8.7$  Hz, 2H), 4.32 – 4.23 (m, 2H), 4.04 (d,  $J = 1.5$  Hz, 1H), 3.80 (s, 3H), 3.50 (d,  $J = 1.7$  Hz, 1H), 1.32 (t,  $J = 7.1$  Hz, 3H).  $^{13}\text{C}$  NMR (100 MHz,  $\text{CDCl}_3$ ):  $\delta$  168.5, 160.4, 127.4, 127.0, 114.2, 61.8, 58.0, 56.8, 55.5, 14.3.

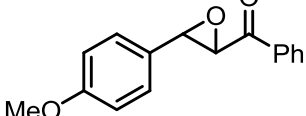 **(trans-3-(4-methoxyphenyl)oxiran-2-yl)(phenyl)methanone (1d):**  $^1\text{H}$ -NMR (400 MHz,  $\text{CDCl}_3$ ): 8.01 (d,  $J = 8.2$  Hz, 2H), 7.41–7.36(m, 5 H), 6.96–6.94 (m, 2 H), 4.25 (d,  $J = 1.2$  Hz, 1H), 4.07 (d,  $J = 1.2$  Hz, 1H), 3.87 (s, 3H).  $^{13}\text{C}$  NMR (100 MHz,  $\text{CDCl}_3$ ):  $\delta$  191.9, 160.6, 133.4, 131.0, 129.1, 127.8, 127.6, 115.0, 114.2, 61.1, 60.1, 55.3.

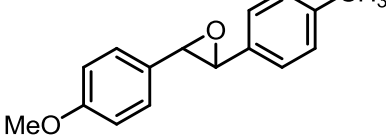 **trans-2-(4-methoxyphenyl)-3-p-tolyloxirane (1e):**  $^1\text{H}$  NMR (400 MHz,  $\text{CDCl}_3$ ):  $\delta$  7.26 – 7.15 (m, 6H), 6.89 (d,  $J = 8.7$  Hz, 2H), 3.81 (d,  $J = 1.5$  Hz, 1H), 3.80–3.78 (m, 4H).  $^{13}\text{C}$  NMR (100 MHz,  $\text{CDCl}_3$ ):  $\delta$  159.8, 138.1, 134.4, 129.4, 129.3, 126.9, 125.5, 114.1, 62.8, 62.7, 55.4, 21.2.

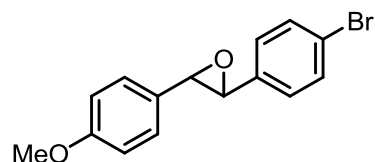

**trans-2-(4-bromophenyl)-3-(4-methoxyphenyl)oxirane (1f):**  $^1\text{H}$  NMR (400 MHz,  $\text{CDCl}_3$ ):  $\delta$  7.33 – 7.24 (m, 4H), 7.06 (t,  $J = 8.6$  Hz, 2H), 6.91 (d,  $J = 8.6$  Hz, 2H), 3.84 (d,  $J = 1.4$  Hz, 1H), 3.82 (s, 3H), 3.77 (d,  $J = 1.4$  Hz, 1H).  $^{13}\text{C}$  NMR (100 MHz,  $\text{CDCl}_3$ ):  $\delta$  160.0, 129.0, 127.3, 127.2, 126.9, 115.8, 115.5, 114.2, 62.9, 62.2, 55.5.

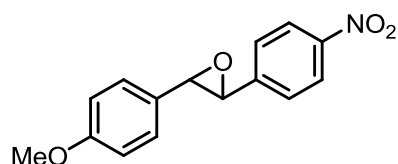

**trans-2-(4-methoxyphenyl)-3-(4-nitrophenyl)oxirane (1g):**  $^1\text{H}$  NMR (400 MHz,  $\text{CDCl}_3$ ):  $\delta$  8.27 (d,  $J = 8.5$  Hz, 2H), 7.53 (d,  $J = 8.6$  Hz, 2H), 7.30 (d,  $J = 8.6$  Hz, 2H), 6.96 (d,  $J = 8.5$  Hz, 2H), 4.00 (d,  $J = 1.2$  Hz, 1H), 3.86 (s, 3H), 3.83 (d,  $J = 1.2$  Hz, 1H).  $^{13}\text{C}$  NMR (100 MHz,  $\text{CDCl}_3$ ):  $\delta$  160.1, 130.2, 128.0, 126.9, 126.4, 123.8, 123.1, 114.2, 63.3, 61.6, 55.3.

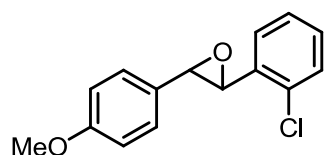

**trans-2-(2-chlorophenyl)-3-(4-methoxyphenyl)oxirane (1h):**  $^1\text{H}$  NMR (400 MHz,  $\text{CDCl}_3$ ):  $\delta$  7.43 (d,  $J = 8.7$  Hz, 2H), 7.42-7.35 (m, 3H), 7.29-7.26 (m, 1H), 6.88 (d,  $J = 8.7$  Hz, 2H), 3.97 (d,  $J = 1.3$  Hz, 1H), 3.85 (s, 3H), 3.83 (d,  $J = 1.3$  Hz, 1H).  $^{13}\text{C}$  NMR (100 MHz,  $\text{CDCl}_3$ ): 160.5, 129.2, 127.4, 127.1, 126.0, 115.9, 115.2, 114.7, 62.5, 62.1, 55.4.

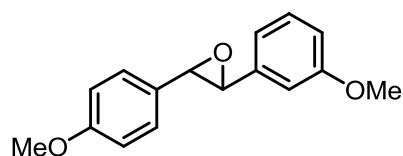

**trans-2-(3-methoxyphenyl)-3-(4-methoxyphenyl)oxirane (1i):**  $^1\text{H}$  NMR (400 MHz,  $\text{CDCl}_3$ ):  $\delta$  7.34 – 7.28 (m, 3H), 6.99 – 6.88 (m, 5H), 3.88 (d,  $J = 1.7$  Hz, 1H), 3.86 – 3.83 (m, 7H).  $^{13}\text{C}$  NMR (100 MHz,  $\text{CDCl}_3$ ):  $\delta$  160.0, 159.9, 139.0, 129.7, 126.9, 118.0, 114.1, 110.5, 62.8, 62.7, 55.4, 55.3.

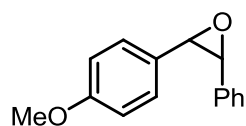

**cis-2-(4-methoxyphenyl)-3-phenyloxirane (1j):**  $^1\text{H}$  NMR (400 MHz,  $\text{CDCl}_3$ ):  $\delta$  7.25 – 7.21 (m, 5H), 7.12 (d,  $J = 8.6$  Hz, 2H), 6.75 (d,  $J = 8.6$  Hz, 2H), 4.35 (q,  $J = 4.2$  Hz, 2H), 3.74 (s, 3H).  $^{13}\text{C}$  NMR (100 MHz,  $\text{CDCl}_3$ ):  $\delta$  159.1, 134.7, 128.2, 127.9, 127.6, 127.0, 126.5, 113.4, 59.9, 59.6, 55.2.

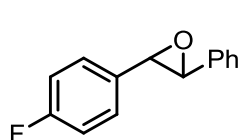

**2-(4-fluorophenyl)-3-phenyloxirane (1k):**  $^1\text{H}$  NMR (400 MHz,  $\text{CDCl}_3$ ):  $\delta$  7.42-7.32 (m, 7H), 7.11 (d,  $J = 10$  Hz, 1H), 7.09 (d,  $J = 10$  Hz, 1H), 3.89 (brs, 1H), 3.86 (brs, 1H).  $^{13}\text{C}$  NMR (100 MHz,  $\text{CDCl}_3$ ):  $\delta$  162.7, 136.8, 132.8, 128.5, 128.4, 127.1, 125.4, 115.5, 62.7, 62.2.

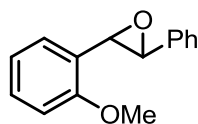

**trans-2-(2-methoxyphenyl)-3-phenyloxirane (1l):**  $^1\text{H}$  NMR (400 MHz,  $\text{CDCl}_3$ ):  $\delta$  7.45 – 7.33 (m, 7H), 7.06 (dd,  $J = 7.5, 7.5$  Hz, 1H), 6.94 (d,  $J = 8.8$  Hz, 1H), 4.34 (d,  $J = 1.8$  Hz, 1H), 3.86 (d,  $J = 1.8$  Hz, 1H), 3.85 (s, 3H).  $^{13}\text{C}$  NMR (100 MHz,  $\text{CDCl}_3$ ):  $\delta$  158.0, 137.4, 128.8, 128.3, 128.0, 125.6, 124.9, 120.6, 110.1, 62.2, 58.2, 55.2.

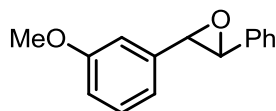

**trans-2-(3-methoxyphenyl)-3-phenyloxirane (1m):**  $^1\text{H}$  NMR (400 MHz,  $\text{CDCl}_3$ ):  $\delta$  7.60 – 7.50 (m, 6H), 7.20-7.15 (m, 3H), 4.10 (s, 2H), 3.85 (s, 3H).  $^{13}\text{C}$  NMR (100 MHz,  $\text{CDCl}_3$ ):  $\delta$  160.0, 138.9, 137.1, 129.7, 128.6, 128.4, 125.6, 118.0, 114.2, 110.5, 62.8, 55.3, 55.2.

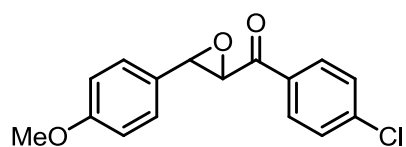

**(4-chlorophenyl)(trans-3-(4-methoxyphenyl)oxiran-2-yl)methanone (1n):**  $^1\text{H}$  NMR (400 MHz,  $\text{CDCl}_3$ ):  $\delta$  7.96 (d,  $J = 8.4$  Hz, 2H), 7.46 (d,  $J = 8.4$  Hz, 2H), 7.28 (d,  $J = 8.6$  Hz, 2H), 6.93 (d,  $J = 8.5$  Hz, 2H), 4.22 (d,  $J = 0.8$  Hz, 1H), 4.02 (d,  $J = 0.8$  Hz, 1H), 3.83 (s, 3H).  $^{13}\text{C}$  NMR (100 MHz,  $\text{CDCl}_3$ ):  $\delta$  192.4, 160.6, 140.7, 133.9, 129.9, 129.4, 127.3, 127.2, 114.4, 61.3, 59.6, 55.5.

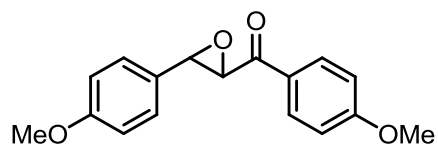

**(4-methoxyphenyl)(trans-3-(4-methoxyphenyl)oxiran-2-yl)methanone (1o):**  $^1\text{H}$  NMR (400 MHz,  $\text{CDCl}_3$ ):  $\delta$  8.01 (d,  $J = 8.8$  Hz, 2H), 7.29 (d,  $J = 8.6$  Hz, 2H), 6.94 (t,  $J = 9.4$  Hz, 4H), 4.25 (d,  $J = 1.3$  Hz, 1H), 4.02 (d,  $J = 1.3$  Hz, 1H), 4.02 (s, 3H), 3.88 (s, 3H).  $^{13}\text{C}$  NMR (100 MHz,  $\text{CDCl}_3$ ):  $\delta$  191.7, 164.3, 160.4, 130.9, 128.8, 127.7, 127.3, 114.3, 114.2, 61.0, 59.3, 55.7, 55.5.

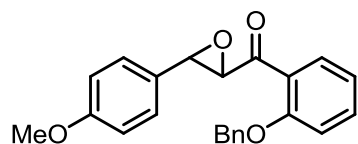

**(2-(benzyloxy)phenyl)(trans-3-(4-methoxyphenyl)oxiran-2-yl)methanone (1p):**  $^1\text{H}$  NMR (400 MHz,  $\text{CDCl}_3$ ):  $\delta$  7.86 (dd,  $J = 1.6, 8.0$  Hz, 1H), 7.48-7.52 (m, 1H),

7.30-7.34 (m, 3H), 7.24-7.29 (m, 5H), 7.19 (d,  $J = 7.2$  Hz, 2H), 7.10 (t,  $J = 7.2$  Hz, 1H), 7.04 (d,  $J = 8.4$  Hz, 1H), 5.03 (s, 2H), 4.50 (d,  $J = 1.6$  Hz, 1H), 4.07 (d,  $J = 1.6$  Hz, 1H), 3.83 (s, 3H).  $^{13}\text{C}$  NMR (100 MHz,  $\text{CDCl}_3$ ):  $\delta$  195.32, 158.52, 136.14, 135.64, 134.68, 130.93, 128.70, 128.59, 128.25, 127.38, 126.67, 125.83, 121.26, 113.04, 70.77, 63.44, 59.98.

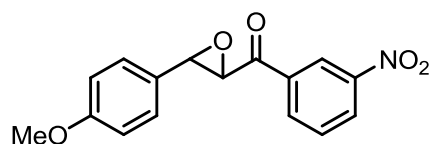

**(trans-3-(4-methoxyphenyl)oxiran-2-yl)(3-nitrophenyl)methanone (1q):**  $^1\text{H}$  NMR (400 MHz,  $\text{CDCl}_3$ ):  $\delta$  8.86 – 8.85 (m, 1H), 8.46 (dd,  $J = 8.2$ ,

1.2 Hz, 1H), 8.35 (d,  $J = 7.7$  Hz, 1H), 7.73 – 7.69 (m, 1H), 7.29 (d,  $J = 8.7$  Hz, 2H), 6.93 (d,  $J = 8.7$  Hz, 2H), 4.26 (d,  $J = 1.7$  Hz, 1H), 4.07 (d,  $J = 1.7$  Hz, 1H), 3.83 (s, 3H).  $^{13}\text{C}$  NMR (100 MHz,  $\text{CDCl}_3$ ):  $\delta$  191.9, 160.7, 136.7, 134.1, 130.8, 130.3, 128.2, 127.3, 126.7, 123.5, 114.5, 61.5, 59.8, 55.5.

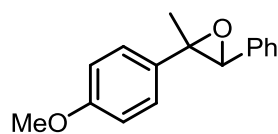

**trans-2-(4-methoxyphenyl)-2-methyl-3-phenyloxirane (1r):**

$^1\text{H}$  NMR (400 MHz,  $\text{CDCl}_3$ ):  $\delta$  7.44 (d,  $J = 7.4$  Hz, 2H), 7.37 (t,  $J = 7.5$  Hz, 2H), 7.29 (t,  $J = 8.3$  Hz, 3H), 6.91 (d,  $J = 8.6$  Hz, 2H), 3.91 (s, 1H), 3.81 (s, 3H), 1.46 (s, 3H).  $^{13}\text{C}$  NMR (100 MHz,  $\text{CDCl}_3$ ):  $\delta$  159.2, 142.5, 128.5, 128.1, 127.9, 127.5, 125.2, 113.7, 67.0, 63.1, 55.3, 16.7.

### 3. General Procedure for Photocatalytic Reaction

A 10 mL round bottom flask was equipped with magnetic stir bar and was charged with substrate **1a** (45 mg, 0.20 mmol), carbon tetrabromide (99.1 mg, 0.30 mmol),  $\text{CH}_3\text{CN}$  (3.0 mL) and  $\text{Ru}(\text{bpy})_3\text{Cl}_2$  (7.5 mg, 0.01 mmol). The mixture was irradiated by a blue LEDs (5 W) for 5 h. After the reaction was completed, the solvent was concentrated *in vacuo*. The residue was purified by flash column chromatography on silica gel (hexanes: EtOAc = 12:1) to afford the desired product **2a** in 92% yield.

### 4. Mechanistic Research

1) Carbocation Trapping Mechanism (*Passway A*)

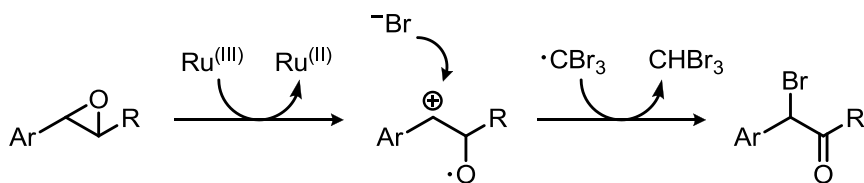

To understand this mechanism further, we were able to trap the benzyl cation intermediate **5** with bromide by utilizing sodium persulfide as single electron transfer reagent and potassium bromide as external bromo-source via a nucleophilic S<sub>N</sub>1 process.

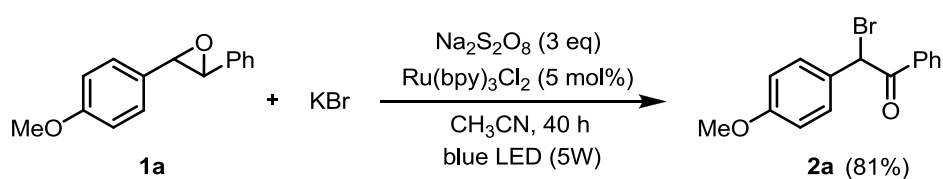

A 10 mL round bottom flask was equipped with epoxide **1a** (49.5 mg, 0.22 mmol), sodium persulfide (156.4 mg, 0.66 mmol), potassium bromide (130.3 mg, 1.10 mmol), CH<sub>3</sub>CN (5.0 mL) and Ru(bpy)<sub>3</sub>Cl<sub>2</sub> (8.2 mg, 0.011 mmol). The reaction mixture was irradiated with 5 W blue LED for 40 h. Then the solvent was removed *in vacuo* and the residue was purified by flash column chromatography on silica gel (hexanes: EtOAc = 12:1) to afford the desired product **2a** in 81% yield.

## 2) Propagation mechanism (*Passway B*)

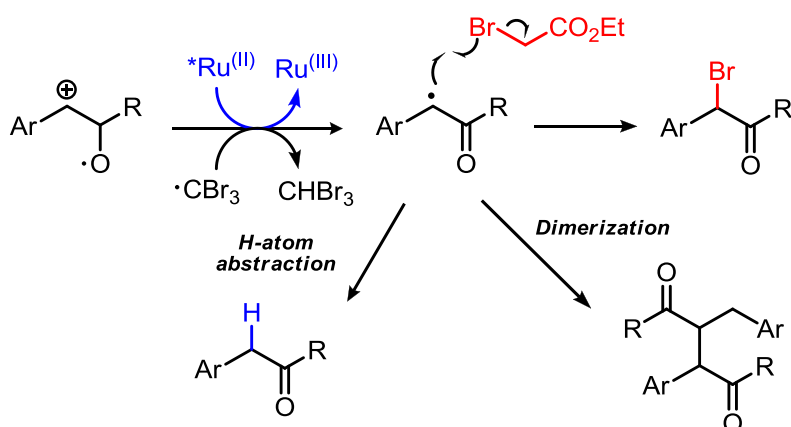

In our investigation we discovered that two kinds of byproducts derived from benzyl radical intermediate **6** were separated during which process a small quantity of oxidative quencher was used. Experiment was also conducted by adding various



amounts of oxidative quencher to a mixture of **1a** and 5 mol% Ru(bpy)<sub>3</sub>Cl<sub>2</sub> in acetonitrile, forming the desired product **2a** along with reduced ketone **7** as main byproduct after 12 h irradiation. The NMR analysis was shown in Figure 1.

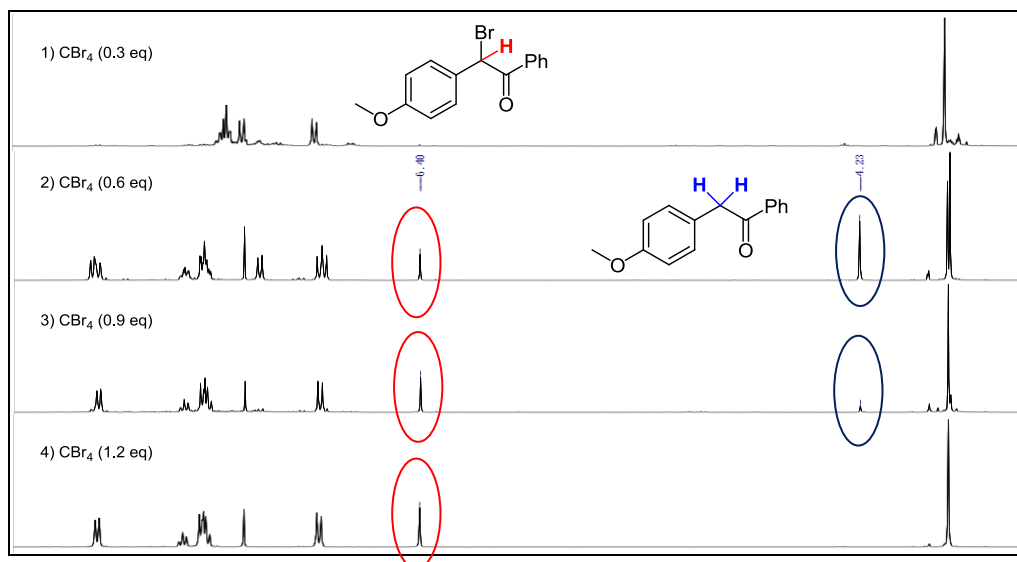

Figure 1 NMR analysis for different amount of CBr<sub>4</sub> addition

To explain this phenomenon, possible mechanistic *Pathway B* was proposed on condition that less than 1.0 equiv oxidative quencher was used. Secondary photocatalytic reaction was performed during which process benzyl radical **6** was obtained from carbocation **5** by performing another photocatalytic cycle. Thus, we were able to set up a control experiment with TEMPO to scavenge the radical **6** and prove its existence.

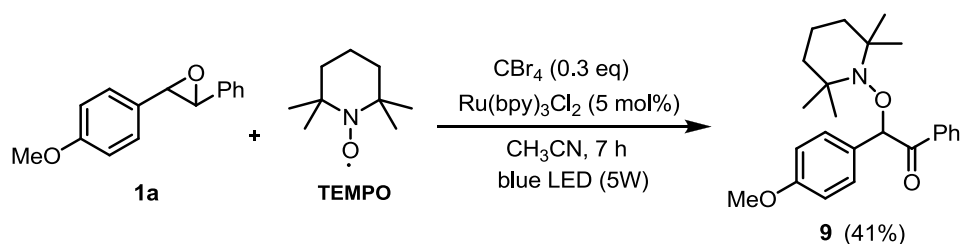

To a solution of 2-(4-methoxyphenyl)-3-phenyloxirane (30.0 mg, 0.133 mmol) in acetonitrile (3 mL) was added CBr<sub>4</sub> (52.9 mg, 0.159 mmol), TEMPO (31.2 mg, 0.200 mmol) and Ru(bpy)<sub>3</sub>Cl<sub>2</sub> (5.0 mg, 0.0067 mmol). The mixture was stirred at room temperature for 7 hours under 5W blue LED irradiation. Then the reaction mixture was concentrated *in vacuo* and purified by chromatography on silica gel to afford 20.8

mg (0.055 mmol, 41% yield) of compound **9** as an orange solid (mp: 96-97 °C).

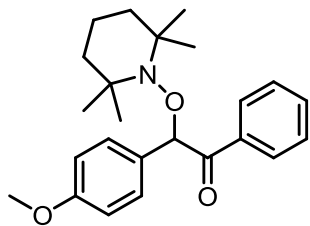

**2-(4-methoxyphenyl)-1-phenyl-2-((2,2,6,6-tetramethylpiperidin-1-yl)oxy)ethanone (9):**  $R_f$  (hexane/EtOAc 10:1): 0.5. IR (neat): 2991, 2926, 2870, 2851, 1677, 1598, 1510, 1080, 810, 798.  $^1\text{H}$  NMR (400 MHz,  $\text{CDCl}_3$ ):  $\delta$  8.06 (d,  $J = 7.4$  Hz, 2H), 7.49 (t,  $J = 7.3$  Hz, 1H), 7.40 (dd,  $J = 8.1, 6.3$  Hz, 4H), 6.81 (d,  $J = 8.7$  Hz, 2H), 5.95 (s, 1H), 3.75 (s, 3H), 1.60-1.28 (m, 6H), 1.17 (d,  $J = 7.2$  Hz, 6H), 0.99 (s, 3H), 0.80 (s, 3H).  $^{13}\text{C}$  NMR (100 MHz,  $\text{CDCl}_3$ ): 198.4, 159.1, 135.4, 132.9, 129.9, 129.3, 128.8, 128.5, 113.9, 92.5, 60.1, 59.8, 55.2, 40.3, 33.9, 33.4, 20.4, 20.3, 17.1. HRMS-ESI (TOF,  $m/z$ ):  $[\text{M} + \text{H}]^+$  calcd for  $\text{C}_{24}\text{H}_{32}\text{NO}_3$ , 382.2377; found, 382.2399.

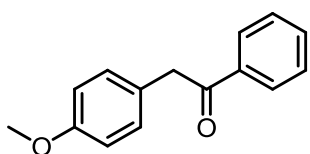

**2-(4-methoxyphenyl)-1-phenylethanone (7):**  $R_f$  (hexane/ EtOAc 8:1): 0.35. IR (neat): 3055, 3024, 3000, 2928, 1692, 1514, 1447, 1035, 793, 756.  $^1\text{H}$  NMR (400 MHz,  $\text{CDCl}_3$ ):  $\delta$  8.01 (d,  $J = 7.3$  Hz, 2H), 7.55 (t,  $J = 7.4$  Hz, 1H), 7.45 (t,  $J = 7.6$  Hz, 2H), 7.18 (d,  $J = 8.5$  Hz, 2H), 6.87 (d,  $J = 8.6$  Hz, 2H), 4.23 (s, 2H), 3.79 (s, 3H).  $^{13}\text{C}$  NMR (100 MHz,  $\text{CDCl}_3$ ):  $\delta$  198.1, 158.7, 136.8, 133.2, 130.6, 128.8, 128.7, 126.7, 114.3, 55.4, 44.8. HRMS-ESI (TOF,  $m/z$ ):  $[\text{M} + \text{H}]^+$  calcd for  $\text{C}_{15}\text{H}_{15}\text{O}_2$ , 227.1067; found, 227.1064.

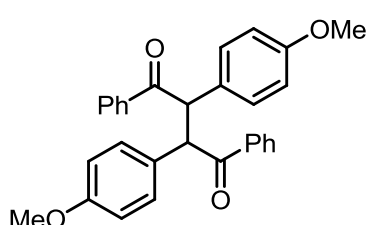

**2,3-bis(4-methoxyphenyl)-1,4-diphenylbutane-1,4-dione (8):** d.r. 3:1.  $R_f$  (hexane/ EtOAc 5:1): 0.25. IR (neat): 3052, 2932, 1689, 1512, 1205, 1044, 802, 795.  $^1\text{H}$  NMR (400 MHz,  $\text{CDCl}_3$ ): Major  $\delta$  7.97 (d,  $J = 7.7$  Hz, 2H), 7.45 (t,  $J = 7.3$  Hz, 1H), 7.37 (d,  $J = 7.7$  Hz, 2H), 6.93 (d,  $J = 8.6$  Hz, 2H), 6.93 (d,  $J = 8.6$  Hz, 2H), 5.29 (s, 1H), 3.70 (s, 3H); Minor  $\delta$  7.87 (d,  $J = 7.7$  Hz, 2H), 7.48 – 7.31 (m, 5H), 6.74 (d,  $J = 8.7$  Hz, 2H), 5.68 (s, 1H), 3.67 (s, 3H).  $^{13}\text{C}$  NMR (100 MHz,  $\text{CDCl}_3$ ): Major  $\delta$  200.0, 158.8, 136.7, 130.0, 129.0, 128.6, 128.5, 114.3, 55.3, 29.9; Minor  $\delta$  200.0, 158.8, 133.0, 132.9, 130.3, 128.7, 128.6, 114.4, 57.8, 29.9. HRMS-ESI (TOF,  $m/z$ ):  $[\text{M} + \text{H}]^+$  calcd for  $\text{C}_{30}\text{H}_{27}\text{O}_4$ , 451.1904; found, 451.1896.

## 5. Characterization of Products

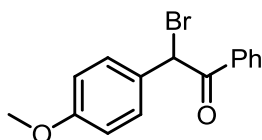

**2-bromo-2-(4-methoxyphenyl)-1-phenylethanone (2a):** According

to the general procedure, compound **2a** was obtained in 92% yield (7 h) as light-yellow solid.  $R_f$  (hexane /EtOAc 6:1): 0.3. IR (neat): 3012, 2932, 2836, 1691, 1607, 1511, 1448, 1253, 1031, 823, 744, 538.  $^1\text{H}$  NMR (400 MHz,  $\text{CDCl}_3$ ):  $\delta$  7.98 (d,  $J = 7.8$  Hz, 2H), 7.56 (t,  $J = 7.4$  Hz, 1H), 7.49-7.42 (m, 4H), 6.89 (d,  $J = 8.7$  Hz, 2H), 6.40 (s, 1H), 3.80 (s, 3H).  $^{13}\text{C}$  NMR (100 MHz,  $\text{CDCl}_3$ ):  $\delta$  191.2, 160.3, 134.3, 133.8, 130.6, 129.2, 128.9, 127.9, 114.6, 55.4, 51.4. HRMS-ESI (TOF,  $m/z$ ):  $[\text{M} + \text{H}]^+$  Calcd for  $\text{C}_{15}\text{H}_{14}\text{BrO}_2$ , 305.0172; found, 305.0159.  $[\text{M} - \text{Br}]^+$  Calcd for  $\text{C}_{15}\text{H}_{13}\text{O}_2$ , 225.0910; Found, 225.0903.

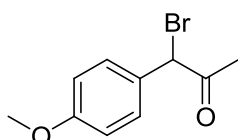

**1-bromo-1-(4-methoxyphenyl)propan-2-one (2b):** According to the general procedure, compound **2b** was obtained in 88% yield (8 h) as white solid.  $R_f$  (hexane/EtOAc 10:1): 0.35. IR (neat): 2951, 2877, 1730, 1514,

1248, 1178, 1035, 821.  $^1\text{H}$  NMR (400 MHz,  $\text{CDCl}_3$ ):  $\delta$  7.35 (d,  $J = 8.7$  Hz, 2H), 6.89 (d,  $J = 8.7$  Hz, 2H), 5.43 (s, 1H), 3.80 (s, 3H), 2.29 (s, 3H).  $^{13}\text{C}$  NMR (100 MHz,  $\text{CDCl}_3$ ):  $\delta$  199.3, 160.3, 130.2, 127.2, 114.6, 56.4, 55.5, 26.4. HRMS (ESI-TOF)  $m/z$ :  $[\text{M} - \text{Br}]^+$  Calcd for  $\text{C}_{10}\text{H}_{11}\text{O}_2$ , 163.0754; Found, 163.0751.

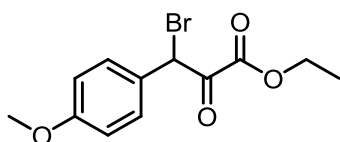

**ethyl 3-bromo-3-(4-methoxyphenyl)-2-oxopropanoate (2c):**

According to the general procedure, compound **2c** was obtained in 67% yield (9 h) as light yellow oil.  $R_f$  (hexane/EtOAc 8:1): 0.3. IR (neat): 3001, 2935, 1733, 1608, 1513, 1257, 1177, 1054, 831, 531.  $^1\text{H}$  NMR (400 MHz,  $\text{CDCl}_3$ ):  $\delta$  7.39 (d,  $J = 8.7$  Hz, 2H), 6.90 (d,  $J = 8.7$  Hz, 2H), 6.22 (s, 1H), 4.32 (qd,  $J = 7.2, 3.7$  Hz, 2H), 3.81 (s, 3H), 1.33 (t,  $J = 7.2$  Hz, 3H).  $^{13}\text{C}$  NMR (100 MHz,  $\text{CDCl}_3$ ):  $\delta$  184.0, 160.7, 160.3, 131.2, 125.0, 114.6, 63.3, 55.5, 50.1, 14.0. HRMS (ESI-TOF)  $m/z$ :  $[\text{M} - \text{Br}]^+$  Calcd for  $\text{C}_{12}\text{H}_{13}\text{O}_4$ , 221.0808; Found, 221.0807.

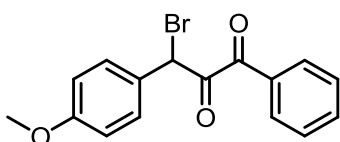

**3-bromo-3-(4-methoxyphenyl)-1-phenylpropane-1,2-dione**

**(2d):** According to the general procedure, compound **2d** was obtained in 78% yield (11 h) as yellow oil.  $R_f$  (hexane/EtOAc 8:1): 0.45. IR (neat): 2962, 2838, 1720, 1673, 1607, 1512, 1257, 1030, 735, 685.  $^1\text{H}$  NMR (400 MHz,  $\text{CDCl}_3$ ):  $\delta$  8.04 – 8.00 (m, 2H), 7.66 (t,  $J = 7.4$  Hz, 1H), 7.50 (dd,  $J = 15.8, 8.3$  Hz, 4H), 6.92 (d,  $J = 8.8$  Hz, 2H), 6.38 (s, 1H), 3.81 (s, 1H).  $^{13}\text{C}$  NMR (100 MHz,  $\text{CDCl}_3$ ):  $\delta$  191.3, 189.9, 160.7, 135.1, 132.4, 131.4, 130.5, 129.0, 125.0, 114.6, 55.5, 50.0. HRMS (ESI-TOF)  $m/z$ :  $[\text{M} -$

$\text{Br}]^+$  Calcd for  $\text{C}_{16}\text{H}_{13}\text{O}_3$ , 253.0859; Found, 253.0837.

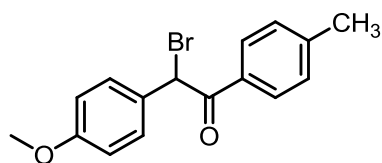

**2-bromo-2-(4-methoxyphenyl)-1-p-tolyloethanone (2e):**

According to the general procedure, compound **2e** was obtained in 75% yield (6 h) as yellow oil.  $R_f$  (hexane/EtOAc 5:1): 0.35. IR (neat): 2925, 2849, 1676, 1600, 1511, 1264, 1166, 1025, 843, 758, 601.  $^1\text{H}$  NMR (400 MHz,  $\text{CDCl}_3$ ):  $\delta$  7.88 (d,  $J = 8.1$  Hz, 2H), 7.46 (d,  $J = 8.7$  Hz, 2H), 7.24 (d,  $J = 8.1$  Hz, 2H), 6.88 (d,  $J = 8.7$  Hz, 2H), 6.39 (s, 1H), 3.79 (s, 3H), 2.39 (s, 3H).  $^{13}\text{C}$  NMR (100 MHz,  $\text{CDCl}_3$ ): 190.8, 160.3, 144.8, 131.7, 130.6, 129.6, 129.4, 128.2, 114.6, 55.4, 51.5, 21.8. HRMS (ESI-TOF)  $m/z$ :  $[\text{M} - \text{Br}]^+$  Calcd for  $\text{C}_{16}\text{H}_{15}\text{O}_2$ , 239.1067; Found, 239.1064.

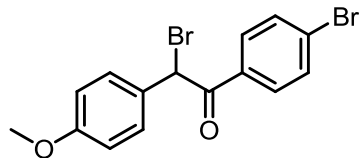

**2-bromo-1-(4-bromophenyl)-2-(4-methoxyphenyl)ethanone (2f):**

According to the general procedure, compound **2f** was obtained in 86% yield (10 h) as light-yellow solid.  $R_f$  (hexane/EtOAc 5:1): 0.35. IR (neat): 2957, 2836, 1691, 1584, 1512, 1253, 1071, 1032, 805, 775, 540.  $^1\text{H}$  NMR (400 MHz,  $\text{CDCl}_3$ ):  $\delta$  7.83 (d,  $J = 8.6$  Hz, 2H), 7.56 (d,  $J = 8.6$  Hz, 2H), 7.43 (d,  $J = 8.7$  Hz, 2H), 6.88 (d,  $J = 8.7$  Hz, 2H), 6.32 (s, 1H), 3.78 (s, 3H).  $^{13}\text{C}$  NMR (100 MHz,  $\text{CDCl}_3$ ):  $\delta$  190.2, 160.4, 133.0, 132.2, 130.7, 130.6, 129.0, 127.5, 114.6, 55.4, 51.2. HRMS (ESI-TOF)  $m/z$ :  $[\text{M} - \text{Br}]^+$  Calcd for  $\text{C}_{15}\text{H}_{12}\text{O}_2\text{Br}$ , 303.0015; Found, 303.0033.

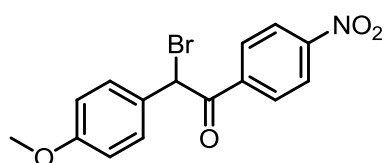

**2-bromo-2-(4-methoxyphenyl)-1-(4-nitrophenyl)ethanone (2g):**

According to the general procedure, compound **2g** was obtained in 72% yield (8 h) as yellow oil.  $R_f$  (hexane/EtOAc 5:1): 0.5. IR (neat): 2935, 2839, 1699, 1606, 1526, 1347, 1255, 1177, 811, 743, 542.  $^1\text{H}$  NMR (400 MHz,  $\text{CDCl}_3$ ):  $\delta$  8.27 (d,  $J = 8.7$  Hz, 2H), 8.12 (d,  $J = 8.7$  Hz, 2H), 7.44 (d,  $J = 8.6$  Hz, 2H), 6.90 (d,  $J = 8.6$  Hz, 2H), 6.33 (s, 1H), 3.80 (s, 3H).  $^{13}\text{C}$  NMR (100 MHz,  $\text{CDCl}_3$ ):  $\delta$  189.8, 160.6, 150.5, 139.1, 130.7, 130.3, 126.7, 124.0, 114.8, 55.5, 51.1. HRMS (ESI-TOF)  $m/z$ :  $[\text{M} - \text{Br}]^+$  Calcd for  $\text{C}_{15}\text{H}_{12}\text{NO}_4$ , 270.0761; Found, 270.0759.

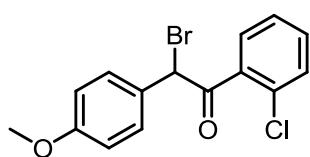

**2-bromo-1-(2-chlorophenyl)-2-(4-methoxyphenyl)ethanone (2h):**

According to the general procedure, compound **2h** was obtained in 85% yield (6 h) as light-yellow solid.  $R_f$  (hexane/EtOAc 6:1): 0.3.

IR (neat): 2933, 2840, 1669, 1597, 1512, 1255, 1031, 842, 746, 609.  $^1\text{H}$  NMR (400 MHz,  $\text{CDCl}_3$ ):  $\delta$  7.44 (d,  $J = 8.7$  Hz, 2H), 7.40-7.35 (m, 3H), 7.30-7.27 (m, 1H), 6.88 (d,  $J = 8.7$  Hz, 2H), 6.23 (s, 1H), 3.80 (s, 3H).  $^{13}\text{C}$  NMR (100 MHz,  $\text{CDCl}_3$ ):  $\delta$  194.7, 160.5, 137.5, 132.2, 131.1, 130.7, 130.4, 130.2, 127.1, 126.7, 114.5, 55.5, 53.8. HRMS (ESI-TOF)  $m/z$ :  $[\text{M} - \text{Br}]^+$  Calcd for  $\text{C}_{15}\text{H}_{12}\text{O}_2\text{Cl}$ , 259.0520; Found, 259.0519.

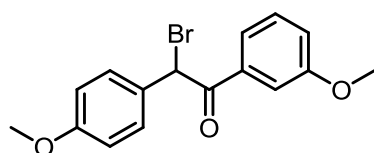

**2-bromo-1-(3-methoxyphenyl)-2-(4-methoxyphenyl)ethane**

**(2i)**: According to the general procedure, compound **2i** was obtained in 77% yield (6 h) as yellow oil.  $R_f$  (hexane/EtOAc

6:1): 0.3. IR (neat): 3003, 2935, 2836, 1688, 1597, 1512, 1252, 1177, 1032, 785, 687, 520.  $^1\text{H}$  NMR (400 MHz,  $\text{CDCl}_3$ ):  $\delta$  7.55-7.49 (m, 2H), 7.46 (d,  $J = 8.7$  Hz, 2H), 7.33 (t,  $J = 8.0$  Hz, 1H), 7.09 (dd,  $J = 8.2, 2.4$  Hz, 1H), 6.88 (d,  $J = 8.7$  Hz, 2H), 6.38 (s, 1H), 3.82 (s, 3H), 3.78 (s, 3H).  $^{13}\text{C}$  NMR (100 MHz,  $\text{CDCl}_3$ ):  $\delta$  191.1, 160.3, 160.0, 135.6, 130.6, 129.8, 128.0, 121.6, 120.2, 114.6, 113.7. HRMS (ESI-TOF)  $m/z$ :  $[\text{M} - \text{Br}]^+$  Calcd for  $\text{C}_{16}\text{H}_{15}\text{O}_3$ , 255.1016; Found, 255.1022.

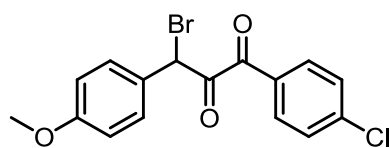

**3-bromo-1-(4-chlorophenyl)-3-(4-methoxyphenyl)propane**

**-1,2-dione (2n)**: According to the general procedure, compound **2n** was obtained in 75% yield (10 h) as

light-yellow solid.  $R_f$  (hexane/EtOAc 5:1): 0.4. IR (neat): 2960, 2917, 2848, 1721, 1677, 1587, 1512, 1259, 1176, 1089, 783, 535.  $^1\text{H}$  NMR (400 MHz,  $\text{CDCl}_3$ ):  $\delta$  7.97 (d,  $J = 8.5$  Hz, 2H), 7.48 (d,  $J = 8.2$  Hz, 2H), 6.91 (d,  $J = 9.5$  Hz, 2H), 6.37 (s, 1H), 3.82 (s, 3H).  $^{13}\text{C}$  NMR (100 MHz,  $\text{CDCl}_3$ ):  $\delta$  189.9, 189.4, 160.8, 141.9, 131.8, 131.4, 130.7, 129.5, 124.8, 114.6, 55.5, 49.8. GC-MS (EI): 51.1, 77.1, 91.1, 105.1, 135.0, 150.1, 288.0

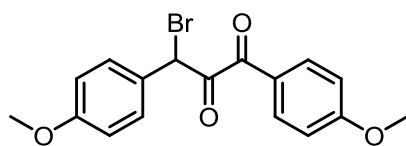

**3-bromo-1,3-bis(4-methoxyphenyl)propane-1,2-dione**

**(2o)**: According to the general procedure, compound **2o** was obtained in 65% yield (14 h) as light-yellow solid.  $R_f$

(hexane/EtOAc 5:1): 0.35. IR (neat): 2956, 1680, 1588, 1502, 1314, 1248, 1030, 748, 655.  $^1\text{H}$  NMR (400 MHz,  $\text{CDCl}_3$ ):  $\delta$  8.01 (d,  $J = 8.9$  Hz, 2H), 7.47 (d,  $J = 8.7$  Hz, 2H), 6.97 (d,  $J = 8.9$  Hz, 2H), 6.91 (d,  $J = 8.7$  Hz, 2H), 6.39 (s, 1H), 3.89 (s, 3H), 3.81 (s, 3H).  $^{13}\text{C}$  NMR (100 MHz,  $\text{CDCl}_3$ ):  $\delta$  190.4, 189.5, 165.2, 160.6, 133.0, 131.3, 125.4, 125.3, 114.5, 114.4, 55.8, 55.5, 50.2. HRMS (ESI-TOF)  $m/z$ :  $[\text{M} - \text{Br}]^+$  Calcd for  $\text{C}_{16}\text{H}_{12}\text{O}_2\text{Cl}$ , 287.0469; Found, 287.0459.

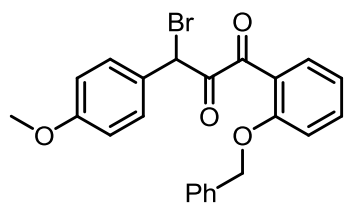

**1-(2-(benzyloxy)phenyl)-3-bromo-3-(4-methoxyphenyl)propane-1,2-dione (2p):**

According to the general procedure, compound **2p** was obtained in 68% yield (11 h) as yellow oil.  $R_f$

(hexane/EtOAc 5:1): 0.4. IR (neat): 2837, 1660, 1596, 1512, 1305, 1255, 1030, 755, 698.  $^1\text{H}$  NMR (400 MHz,  $\text{CDCl}_3$ ):  $\delta$  7.89 (d,  $J = 7.8$  Hz, 1H), 7.55 (t,  $J = 7.8$  Hz, 1H), 7.48-7.39 (m, 5H), 7.19 (d,  $J = 8.6$  Hz, 2H), 7.08 (t,  $J = 7.5$  Hz, 1H), 7.01 (d,  $J = 8.5$  Hz, 1H), 6.79 (d,  $J = 8.6$  Hz, 2H), 5.72 (s, 1H), 5.14 (d,  $J = 2.7$  Hz, 2H), 3.77 (s, 3H).  $^{13}\text{C}$  NMR (100 MHz,  $\text{CDCl}_3$ ):  $\delta$  193.0, 192.5, 160.2, 159.4, 136.5, 135.3, 131.1, 129.0, 128.7, 128.3, 127.1, 122.9, 121.6, 114.3, 113.3, 71.4, 55.4, 51.3.

HRMS (ESI-TOF)  $m/z$ :  $[\text{M} - \text{Br}]^+$  Calcd for  $\text{C}_{17}\text{H}_{15}\text{O}_4$ , 283.0965; Found, 283.0969.

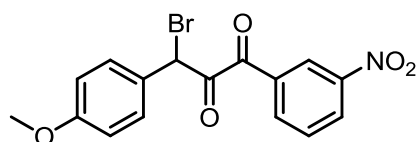

**3-bromo-3-(4-methoxyphenyl)-1-(3-nitrophenyl)propane-1,2-dione (2q):**

According to the general procedure, compound **2q** was obtained in 77% yield (14 h) as yellow

oil.  $R_f$  (hexane/EtOAc 8:1): 0.4. IR (neat): 3087, 1702, 1592, 1533, 1350, 1257, 1178, 1029, 831, 720.  $^1\text{H}$  NMR (400 MHz,  $\text{CDCl}_3$ ):  $\delta$  8.86 (s, 1H), 8.51 (d,  $J = 8.1$  Hz, 1H), 8.36 (d,  $J = 7.8$  Hz, 1H), 7.74 (t,  $J = 8.0$  Hz, 1H), 7.50 (d,  $J = 8.7$  Hz, 2H), 6.94 (d,  $J = 8.7$  Hz, 2H), 6.40 (s, 1H), 3.83 (s, 3H).  $^{13}\text{C}$  NMR (100 MHz,  $\text{CDCl}_3$ ):  $\delta$  188.8, 188.4, 161.0, 135.8, 135.5, 133.8, 131.5, 130.3, 129.0, 125.2, 124.3, 114.7, 55.5, 49.5. HRMS (ESI-TOF)  $m/z$ :  $[\text{M} - \text{Br}]^+$  Calcd for  $\text{C}_{23}\text{H}_{19}\text{O}_4$ , 359.1278; Found, 359.1280.

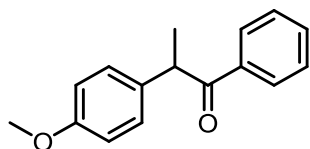

**2-(4-methoxyphenyl)-1-phenylpropan-1-one (3r):** According to the general procedure, compound **3r** was obtained in 82% yield (9 h) as yellow oil.  $R_f$  (hexane/EtOAc 8:1): 0.5. IR (neat): 3048, 2977, 2926,

1677, 1620, 1521, 1466, 1233, 1208.  $^1\text{H}$  NMR (400 MHz,  $\text{CDCl}_3$ ):  $\delta$  7.95 (d,  $J = 7.4$  Hz, 2H), 7.47 (t,  $J = 7.4$  Hz, 1H), 7.38 (t,  $J = 7.6$  Hz, 2H), 7.21 (d,  $J = 8.7$  Hz, 2H), 6.83 (d,  $J = 8.7$  Hz, 2H), 4.65 (q,  $J = 6.8$  Hz, 1H), 3.75 (s, 3H), 1.51 (d,  $J = 6.8$  Hz, 3H).  $^{13}\text{C}$  NMR (100 MHz,  $\text{CDCl}_3$ ):  $\delta$  200.6, 158.6, 136.6, 133.6, 132.8, 128.9, 128.8, 128.6, 114.5, 55.3, 47.1, 19.6. HRMS-ESI (TOF,  $m/z$ ):  $[\text{M} + \text{H}]^+$  calcd for  $\text{C}_{16}\text{H}_{17}\text{O}_2$ , 241.1223; found, 241.1249.

## 6. $^1\text{H}$ NMR and $^{13}\text{C}$ NMR Spectra for Products

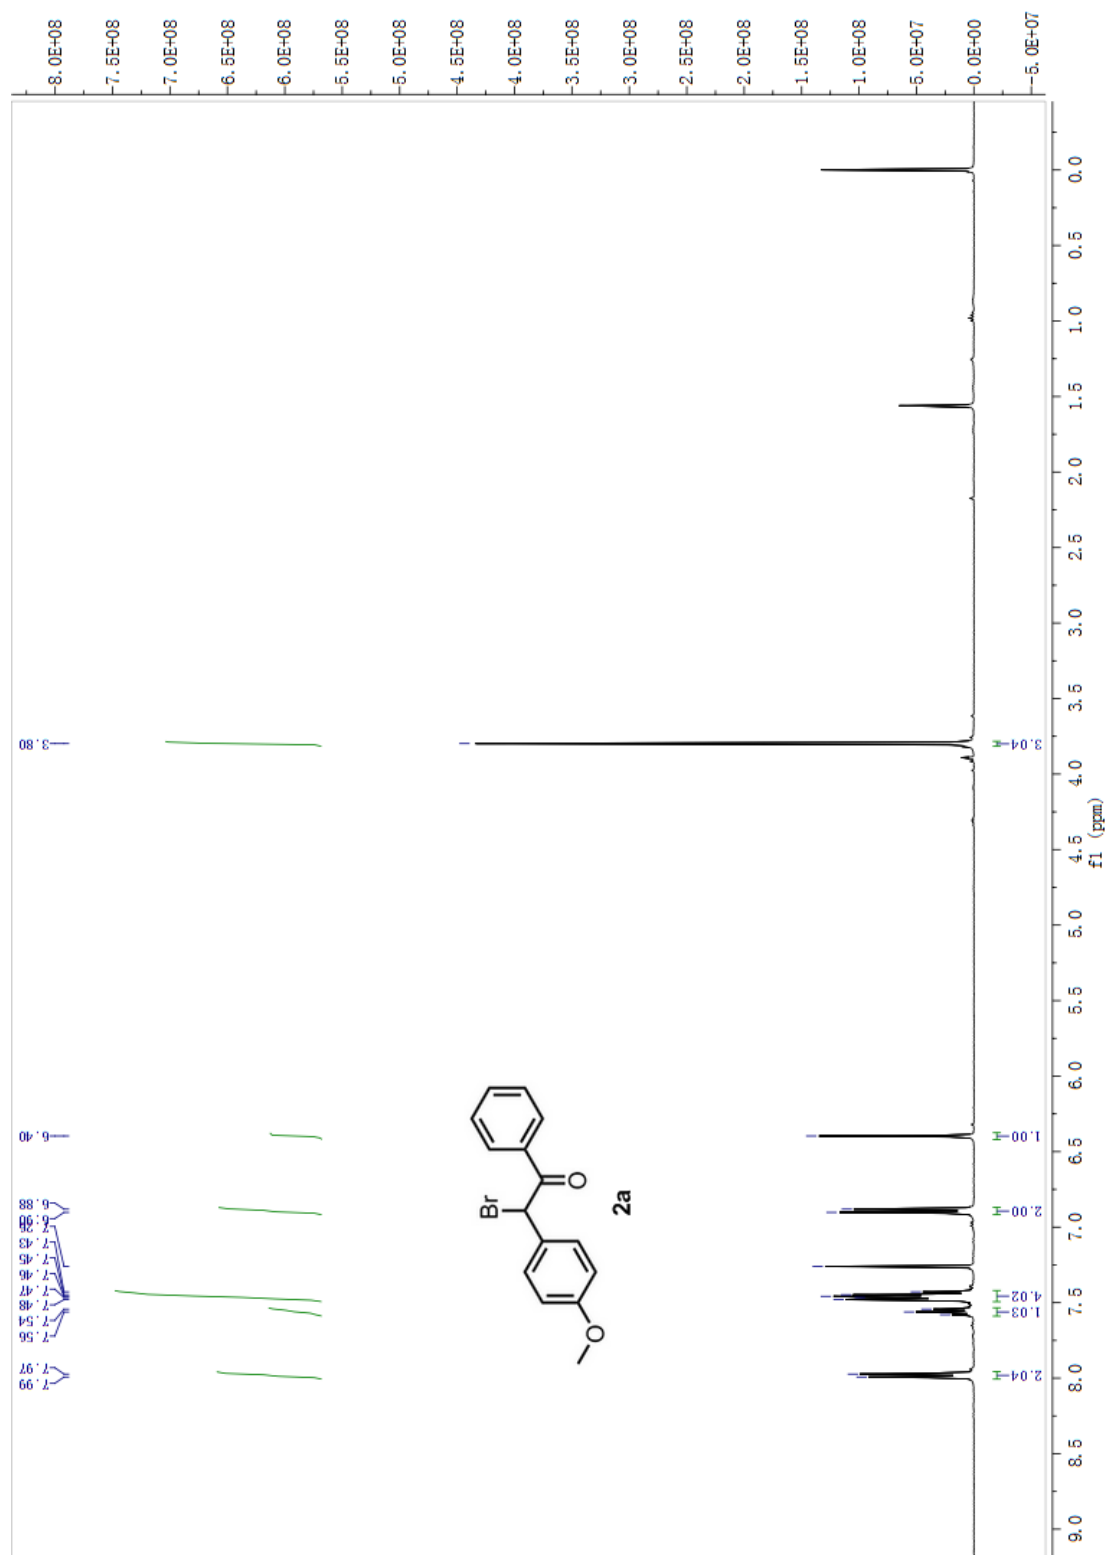

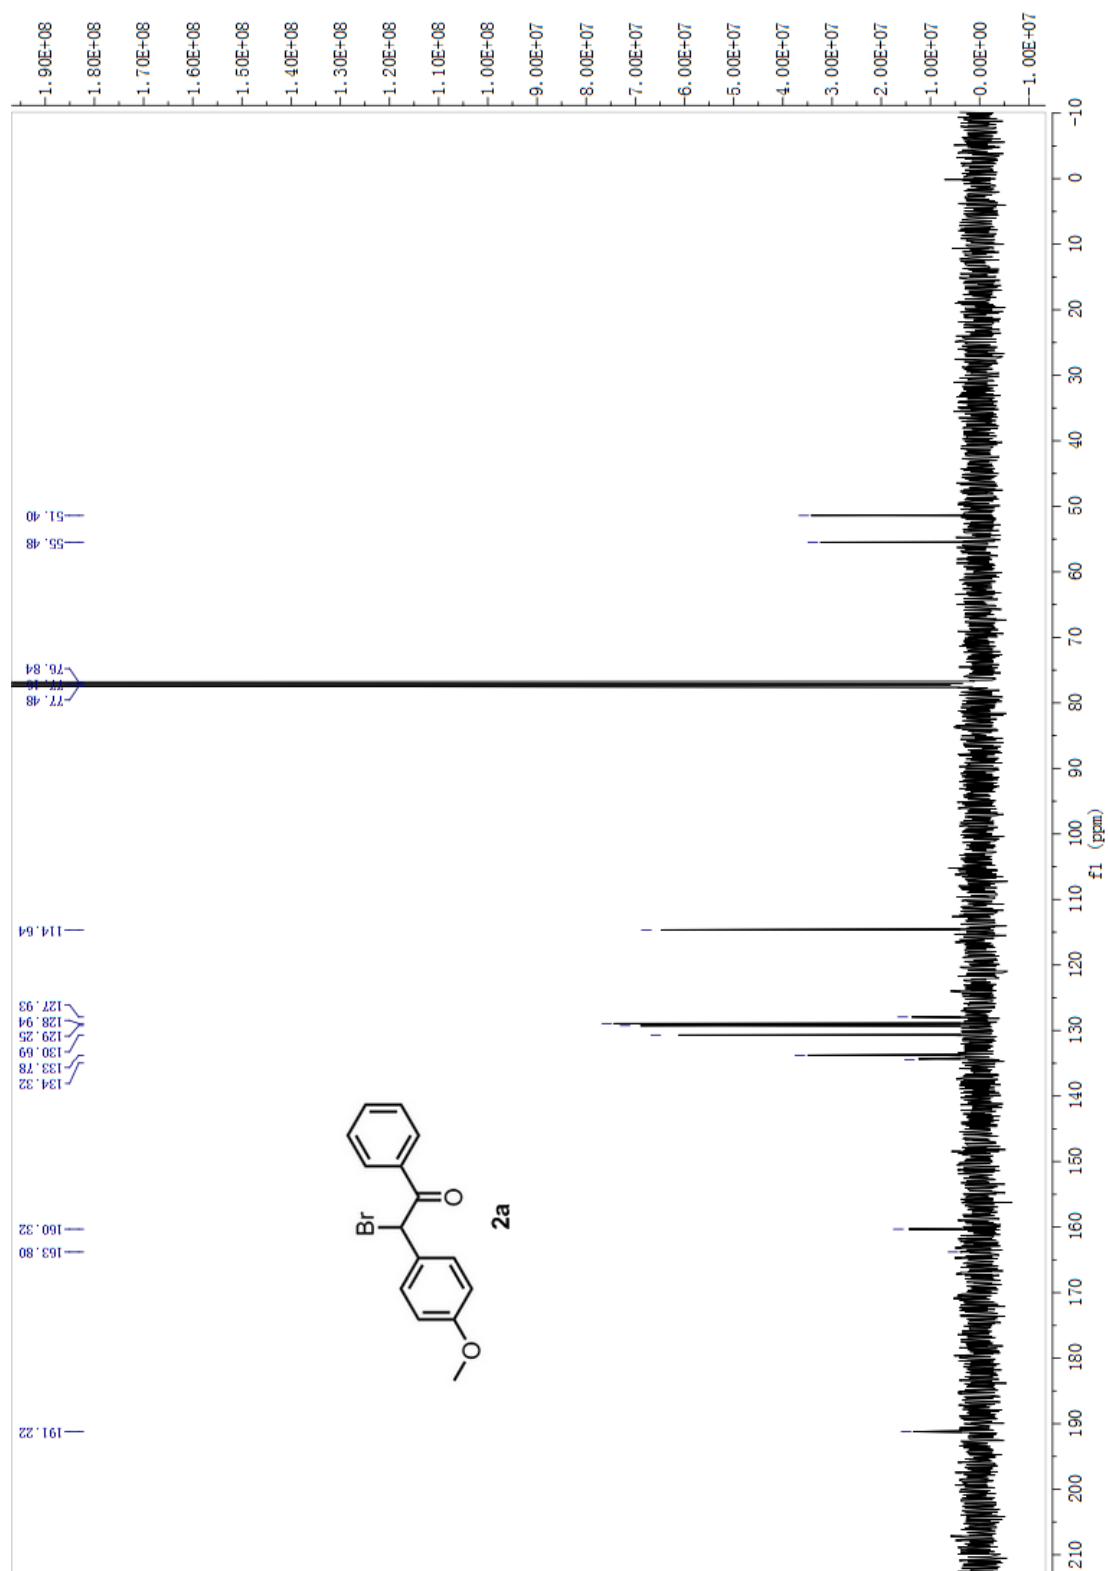



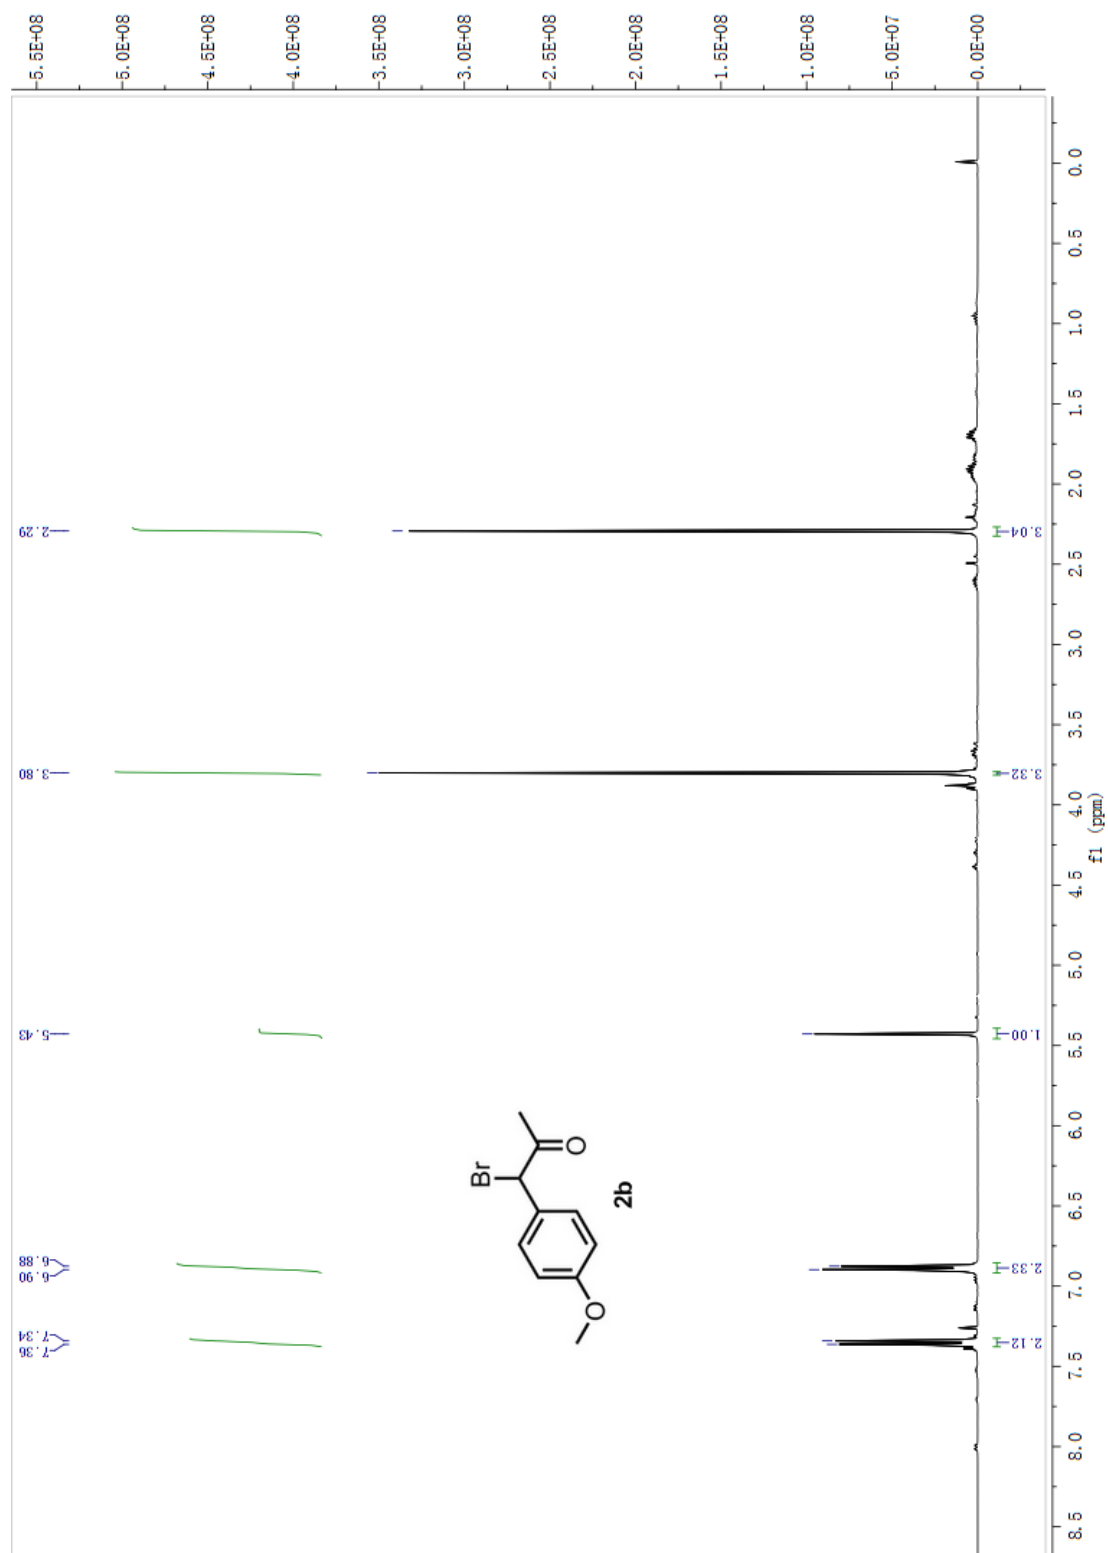

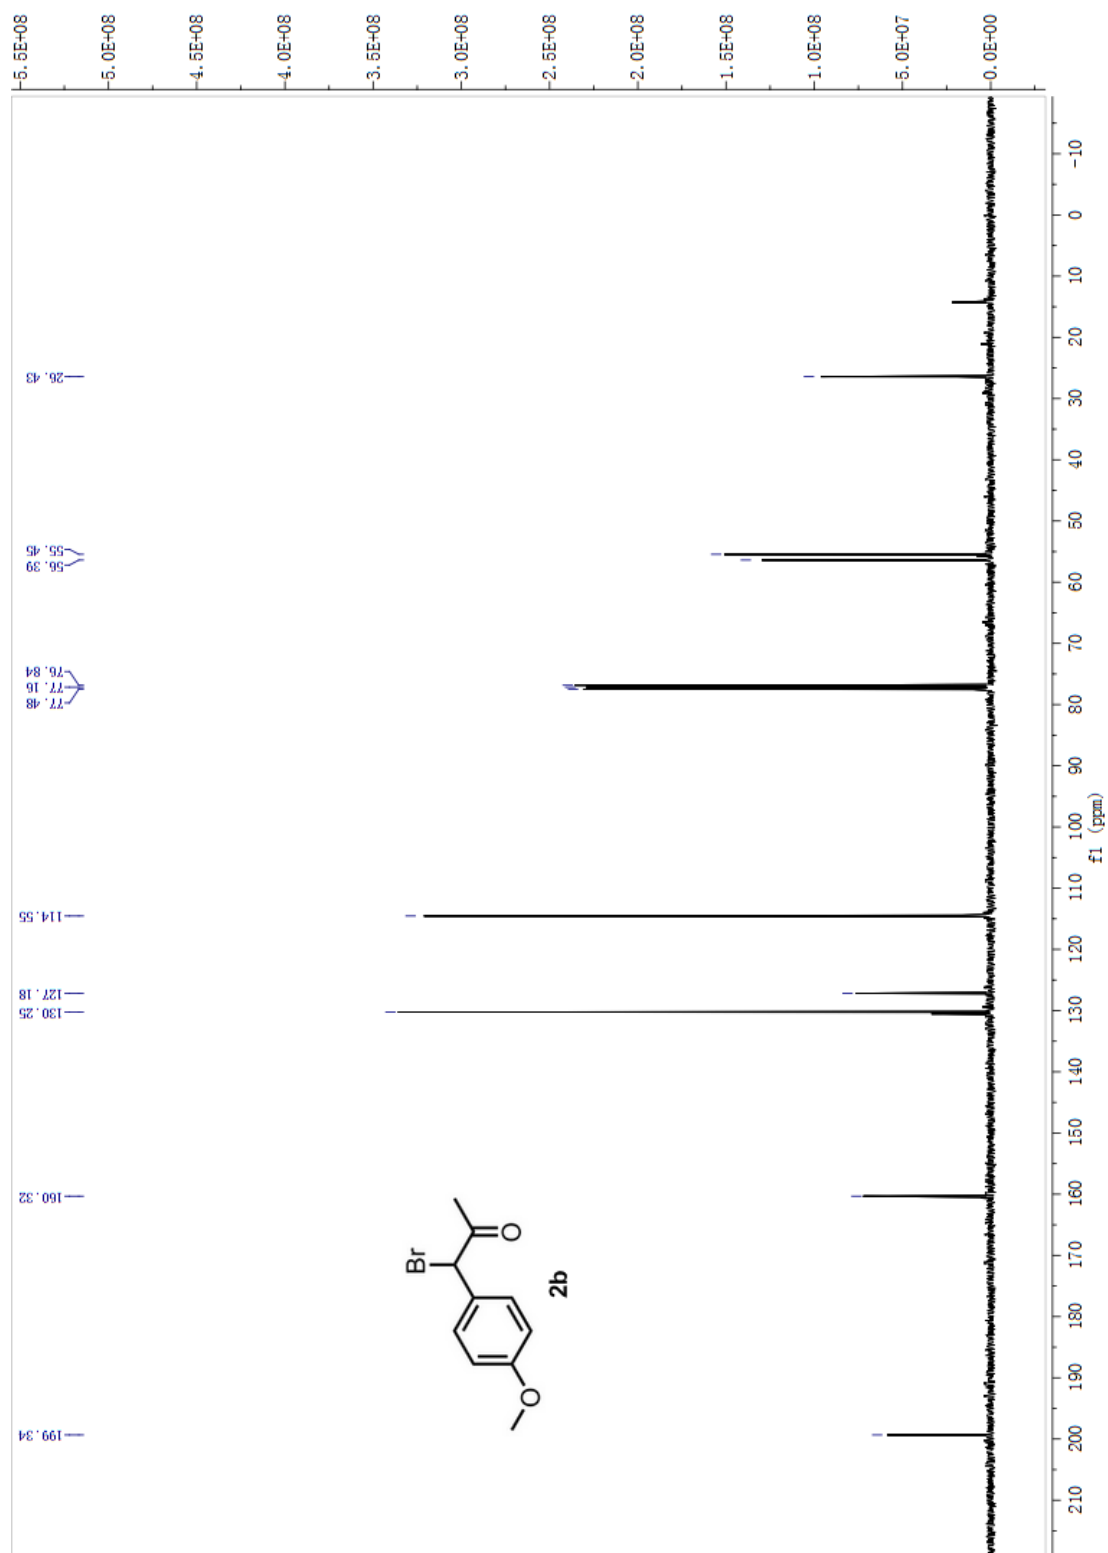

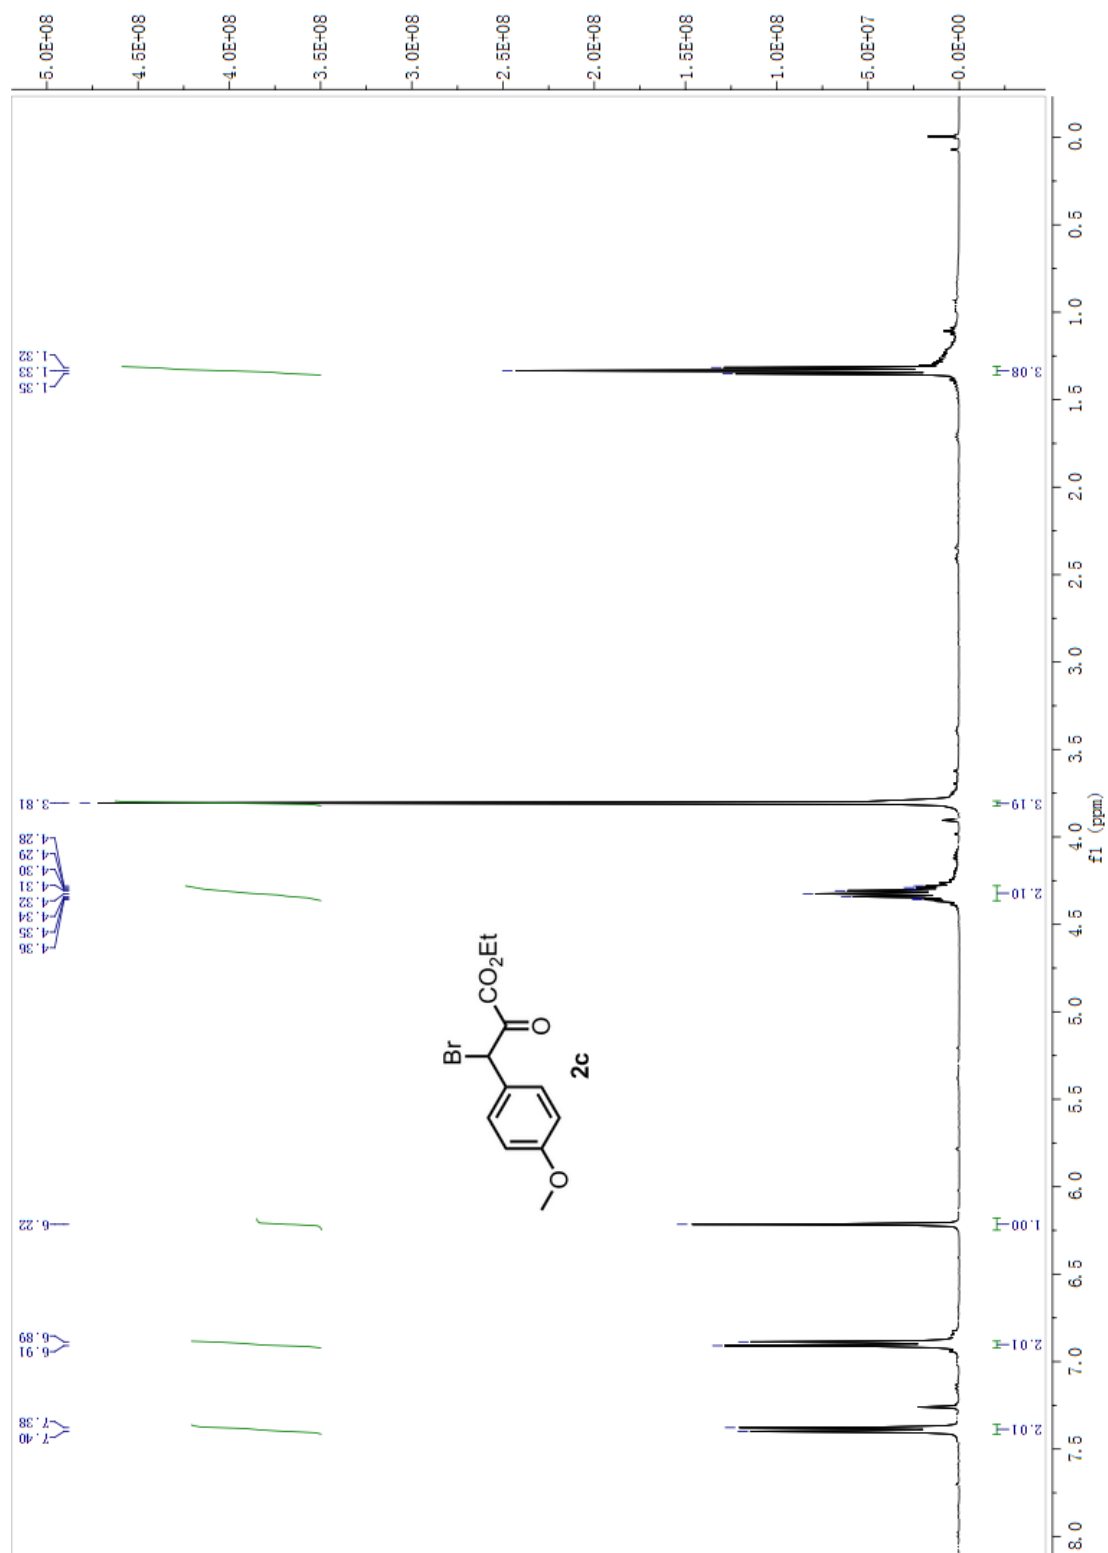

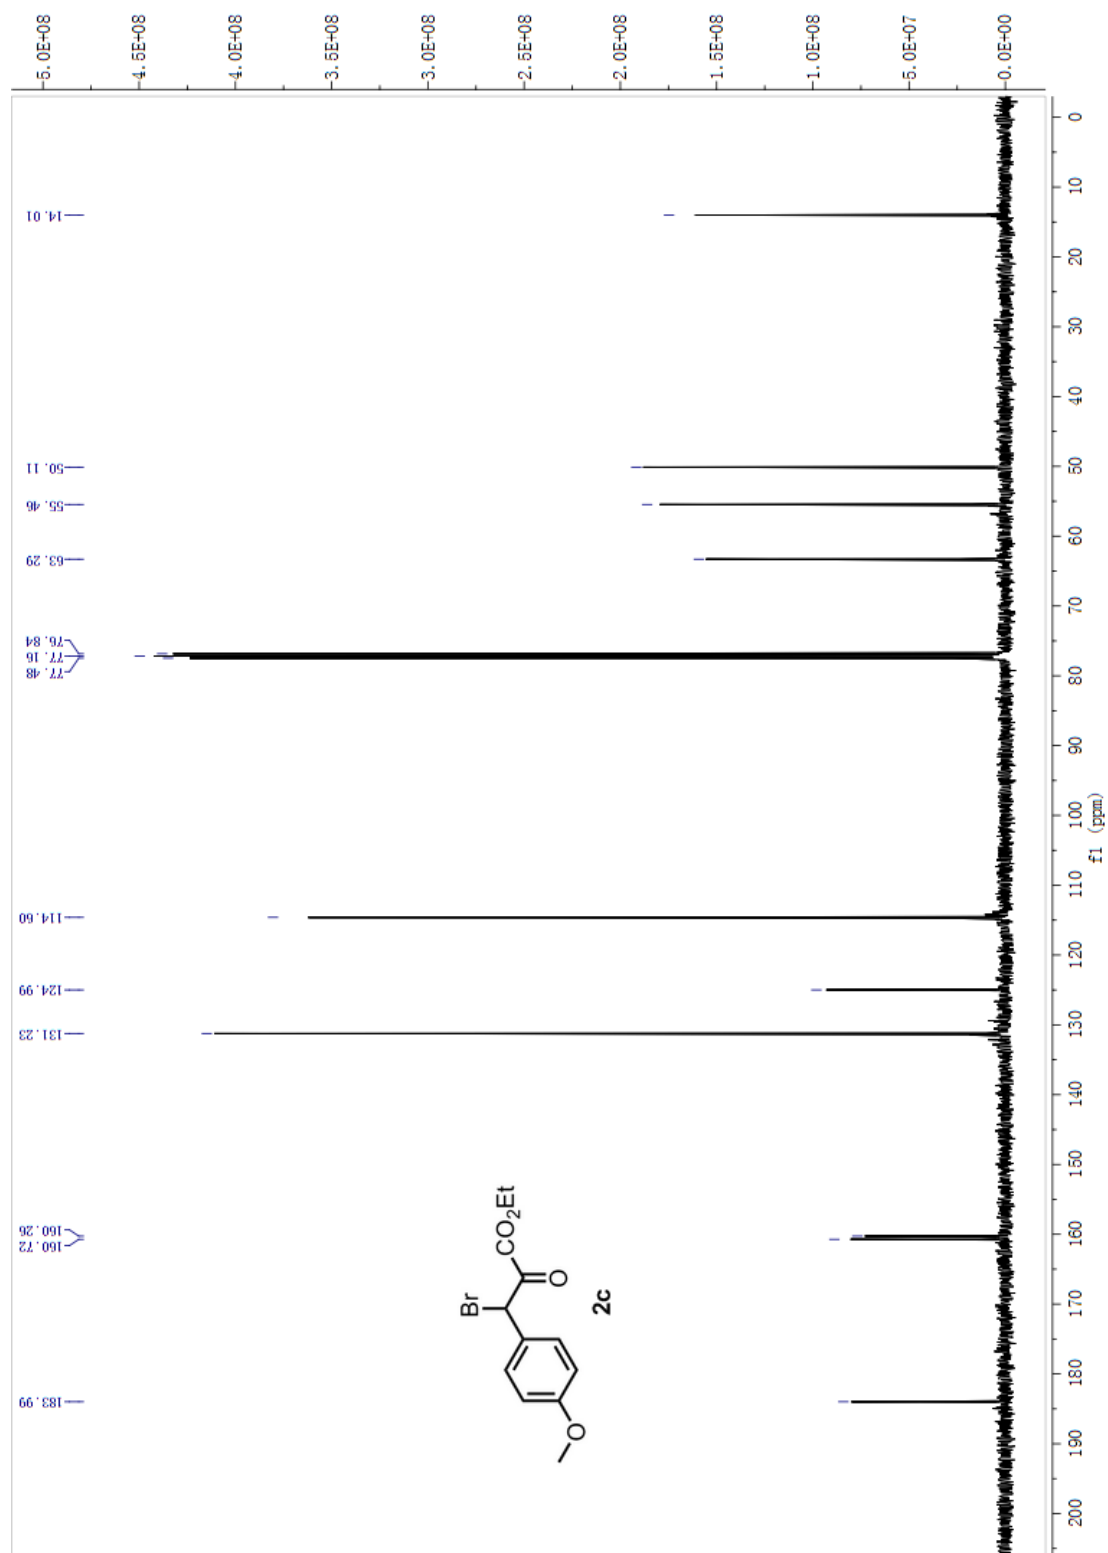

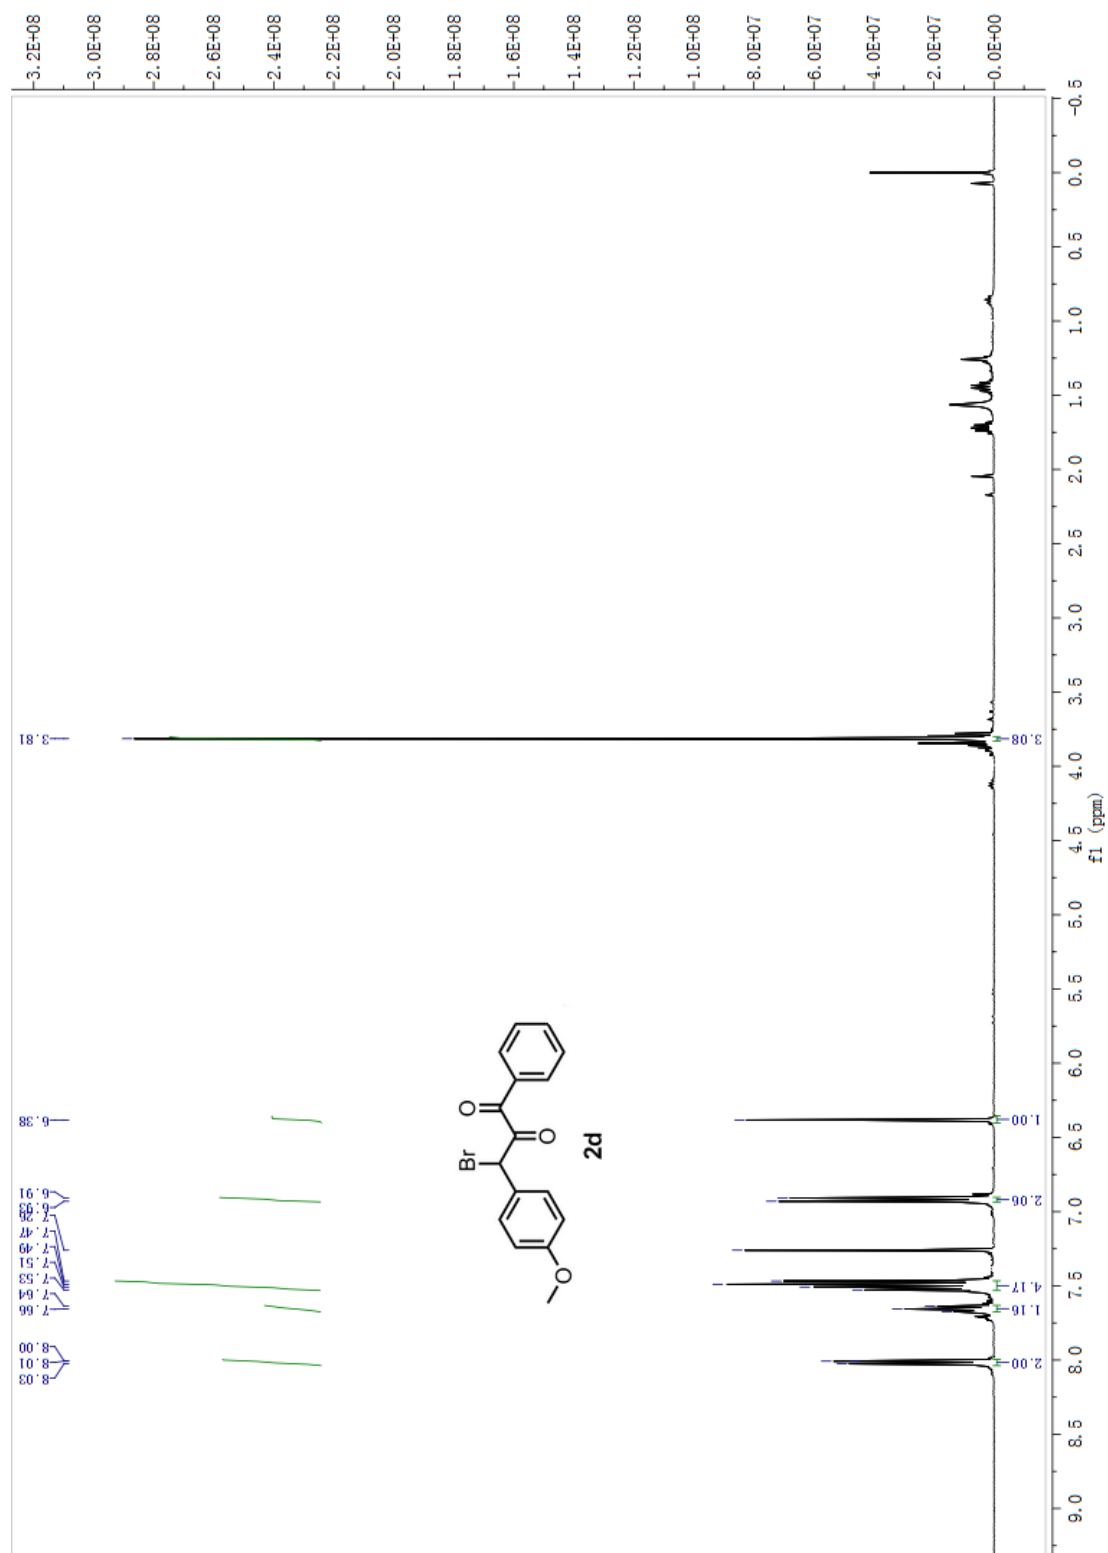

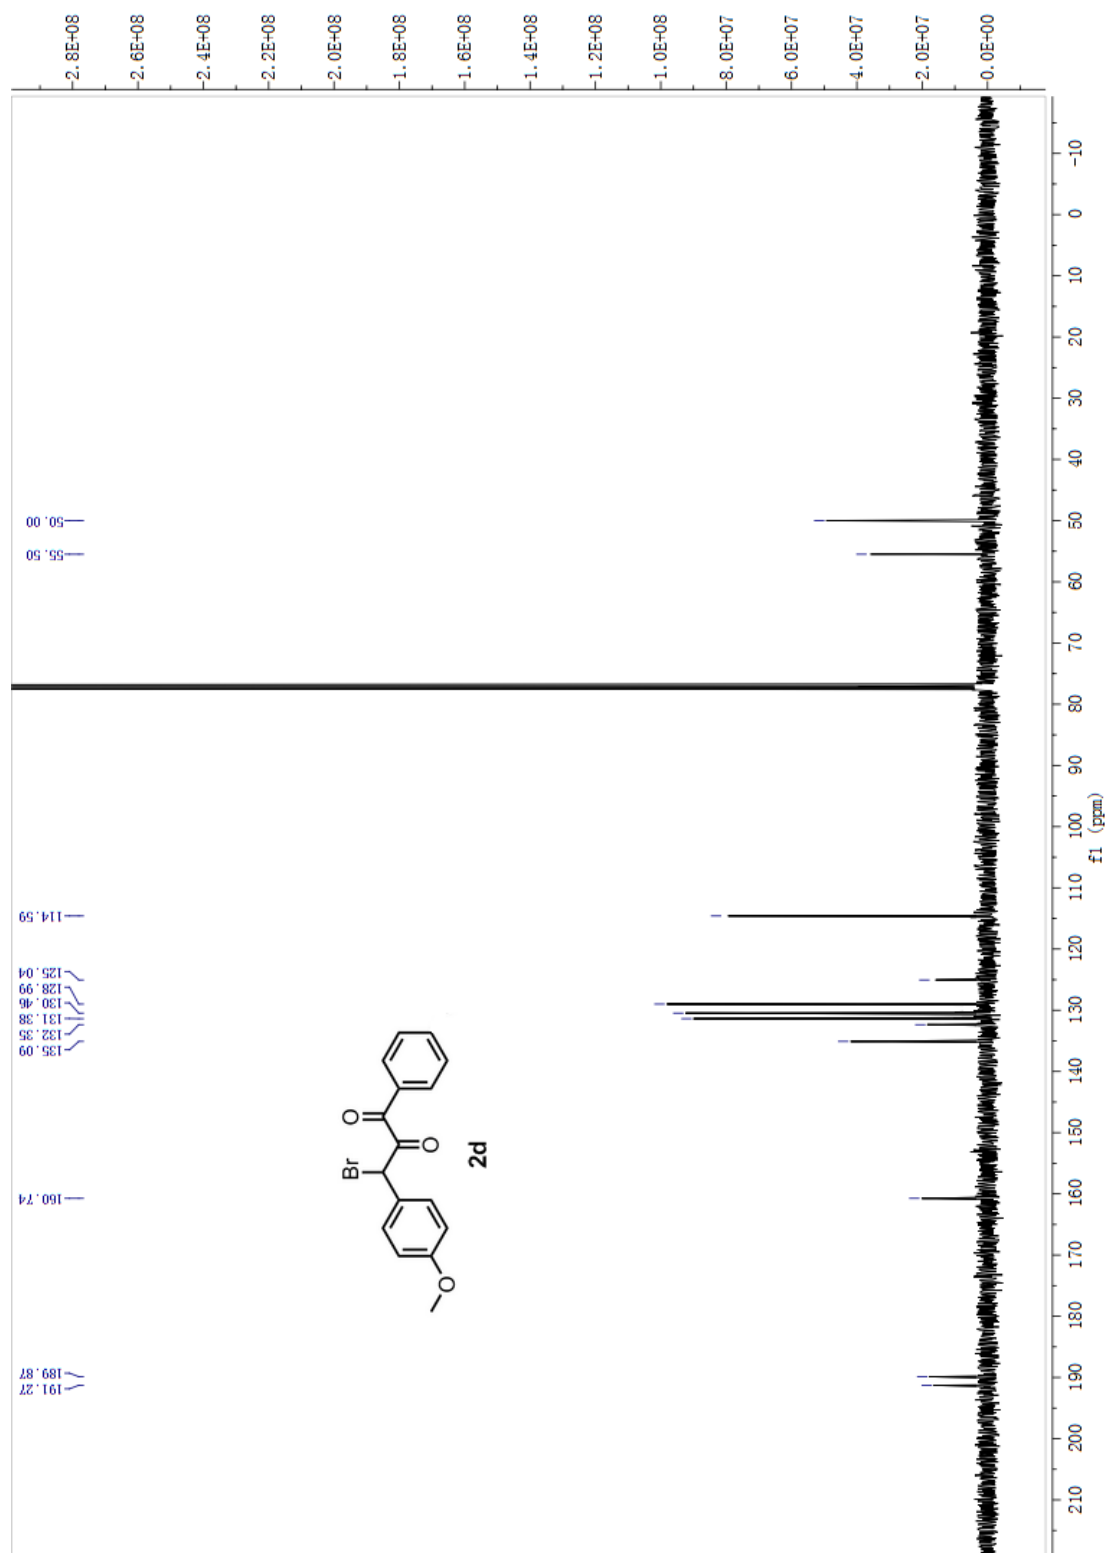

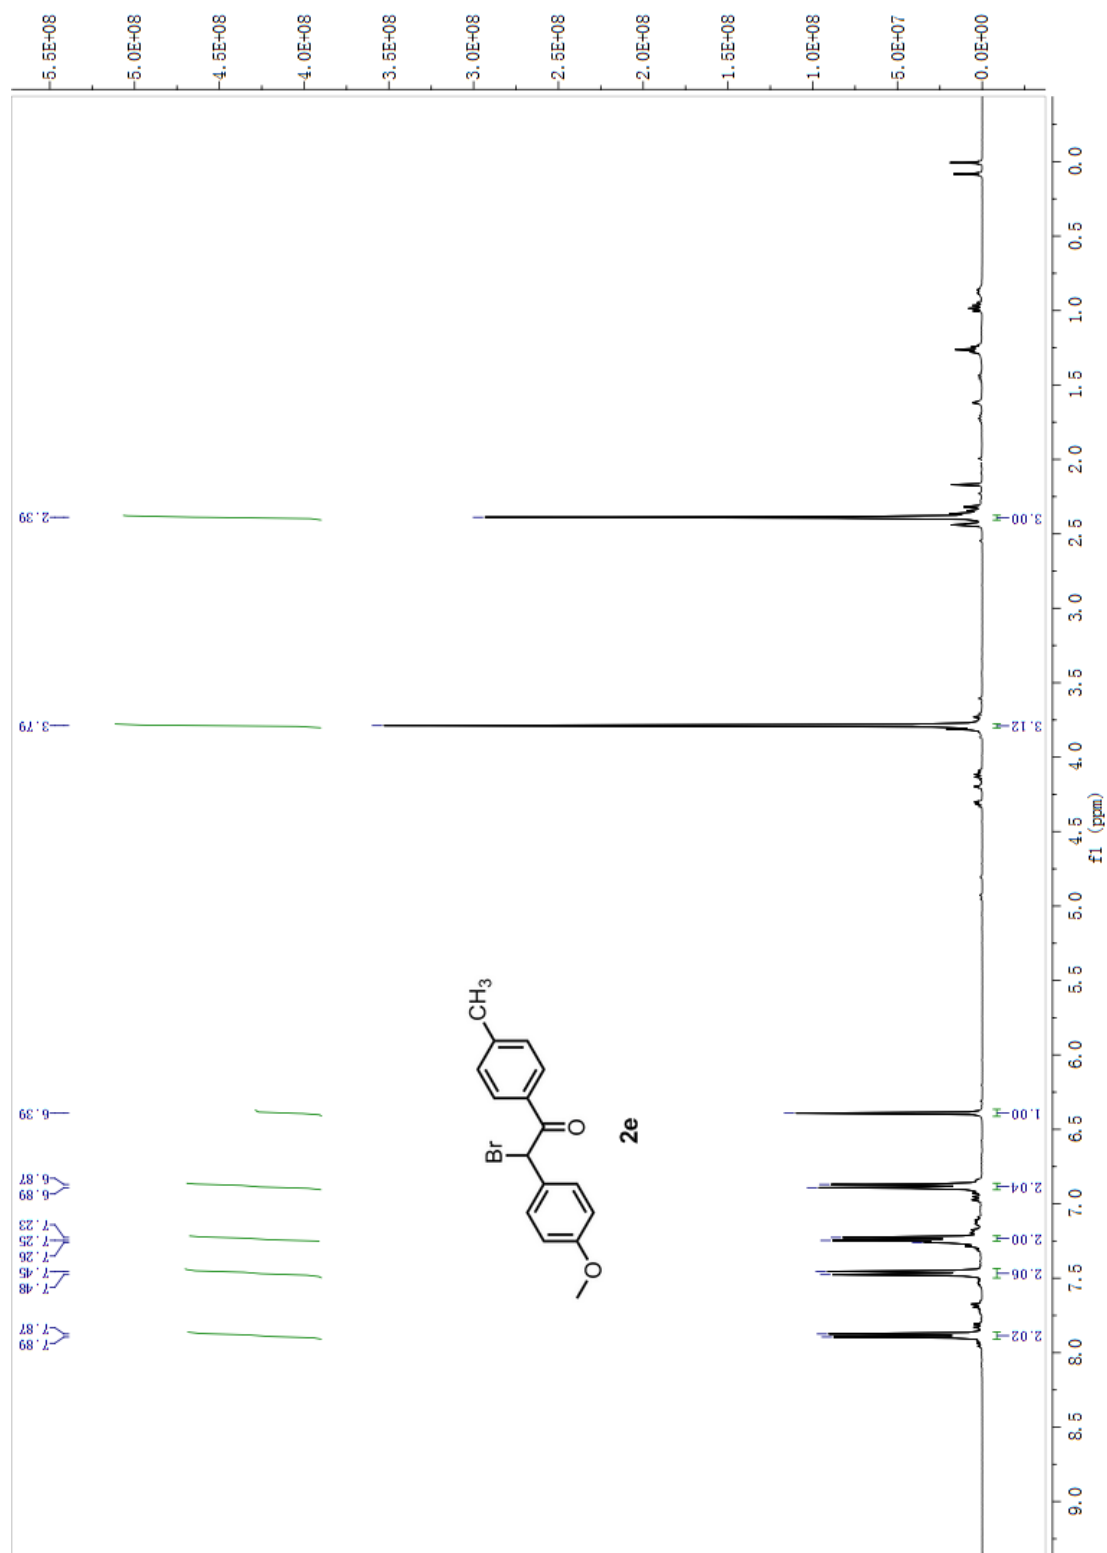

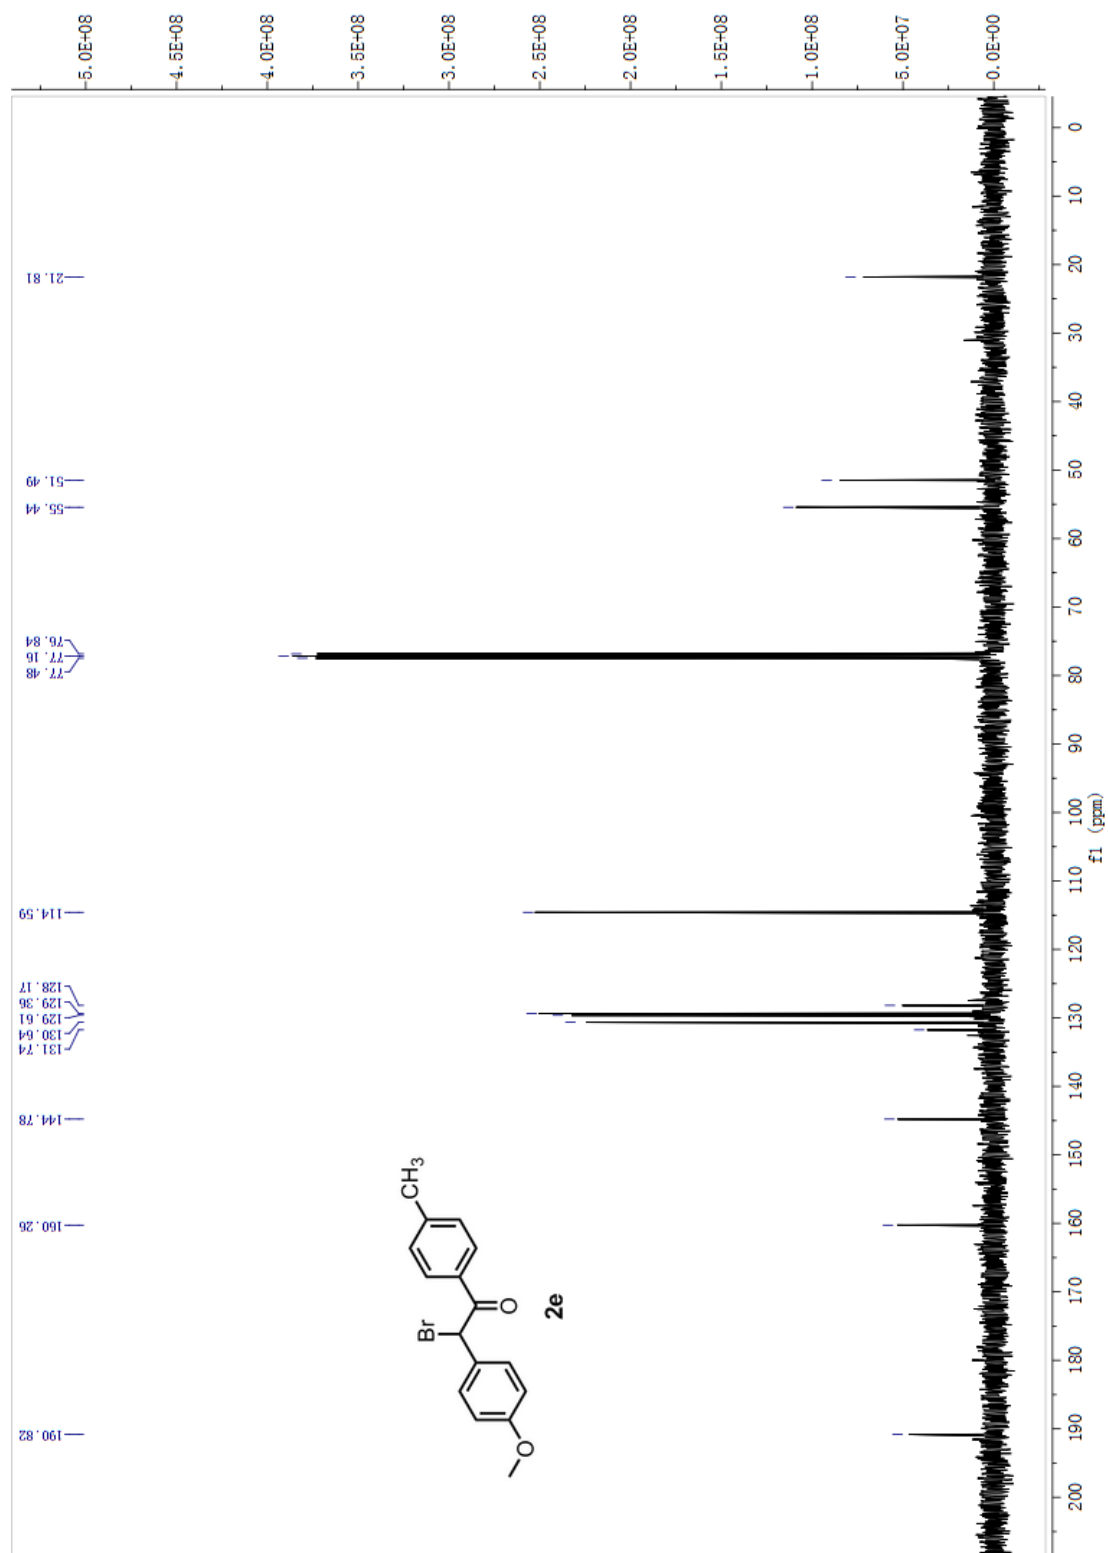



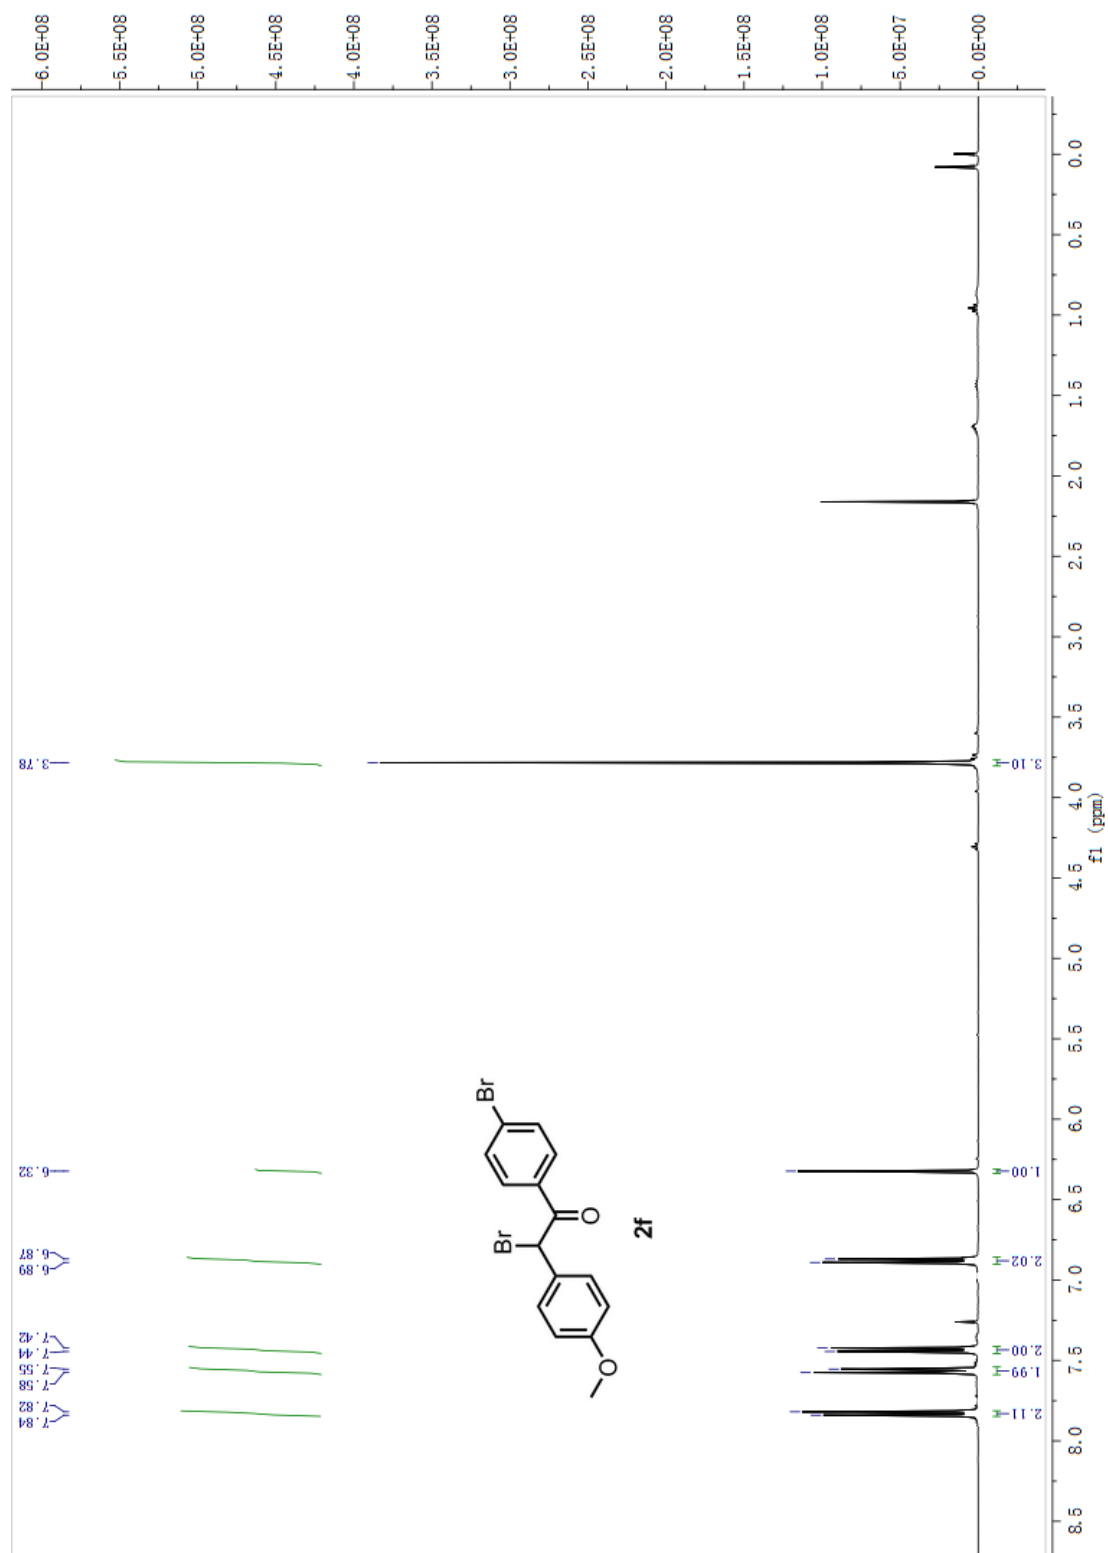

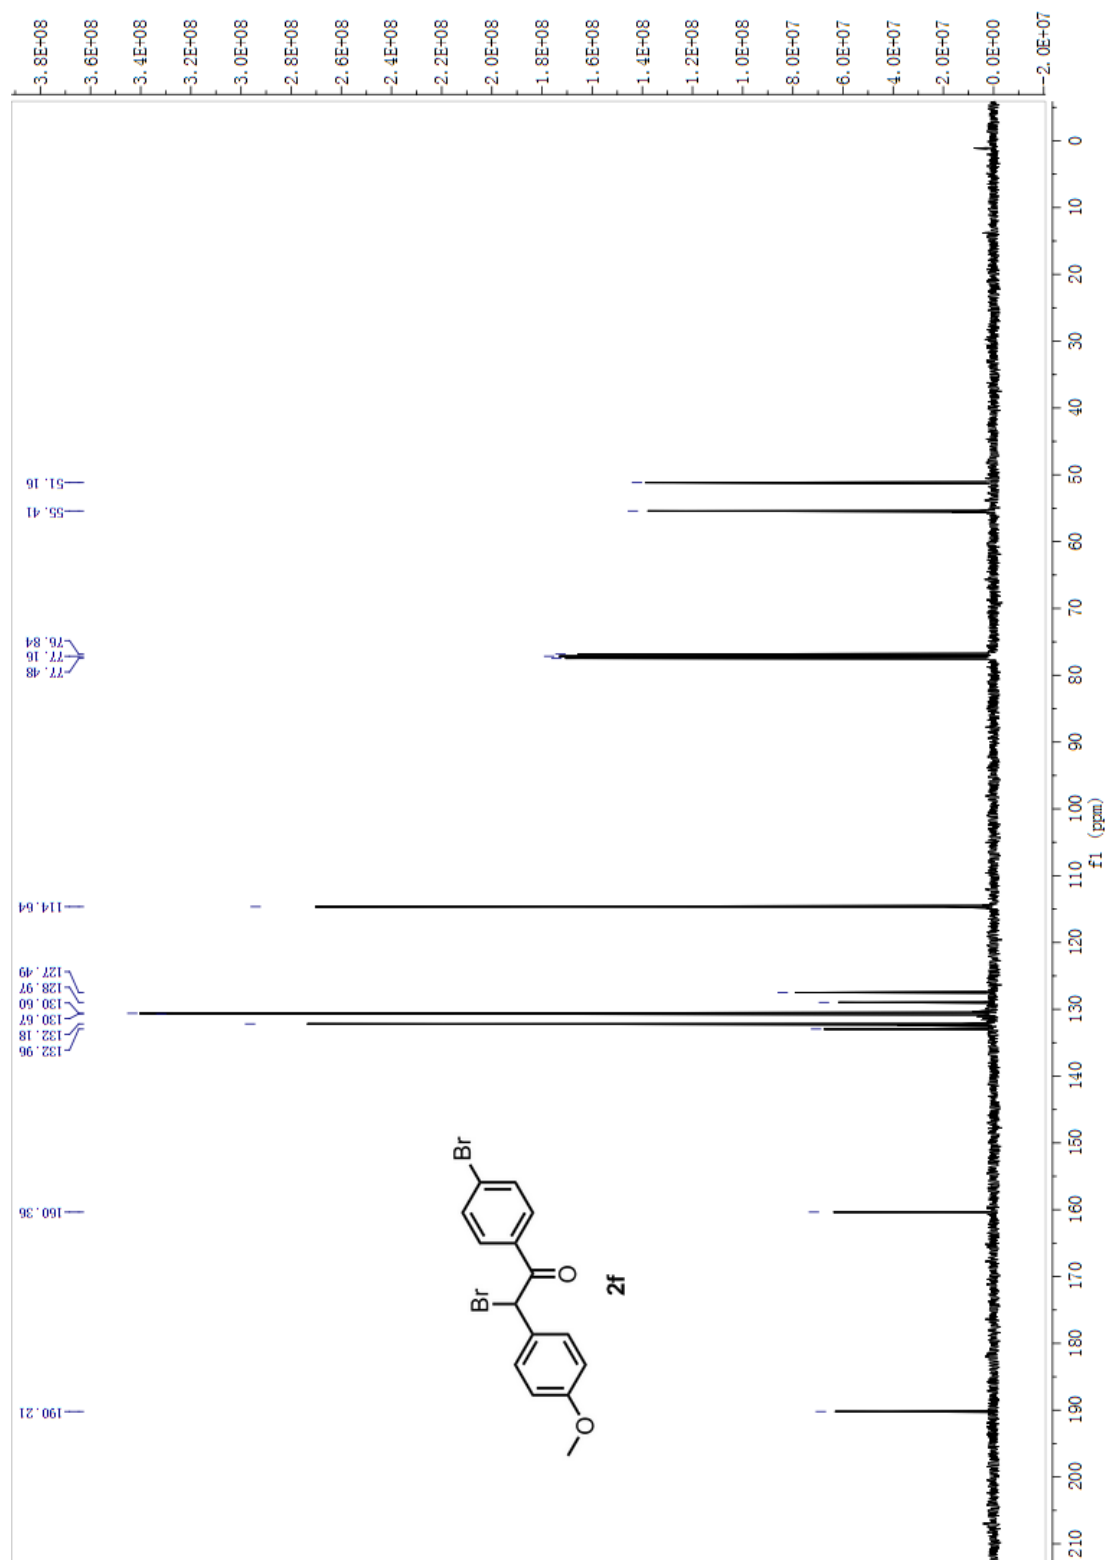

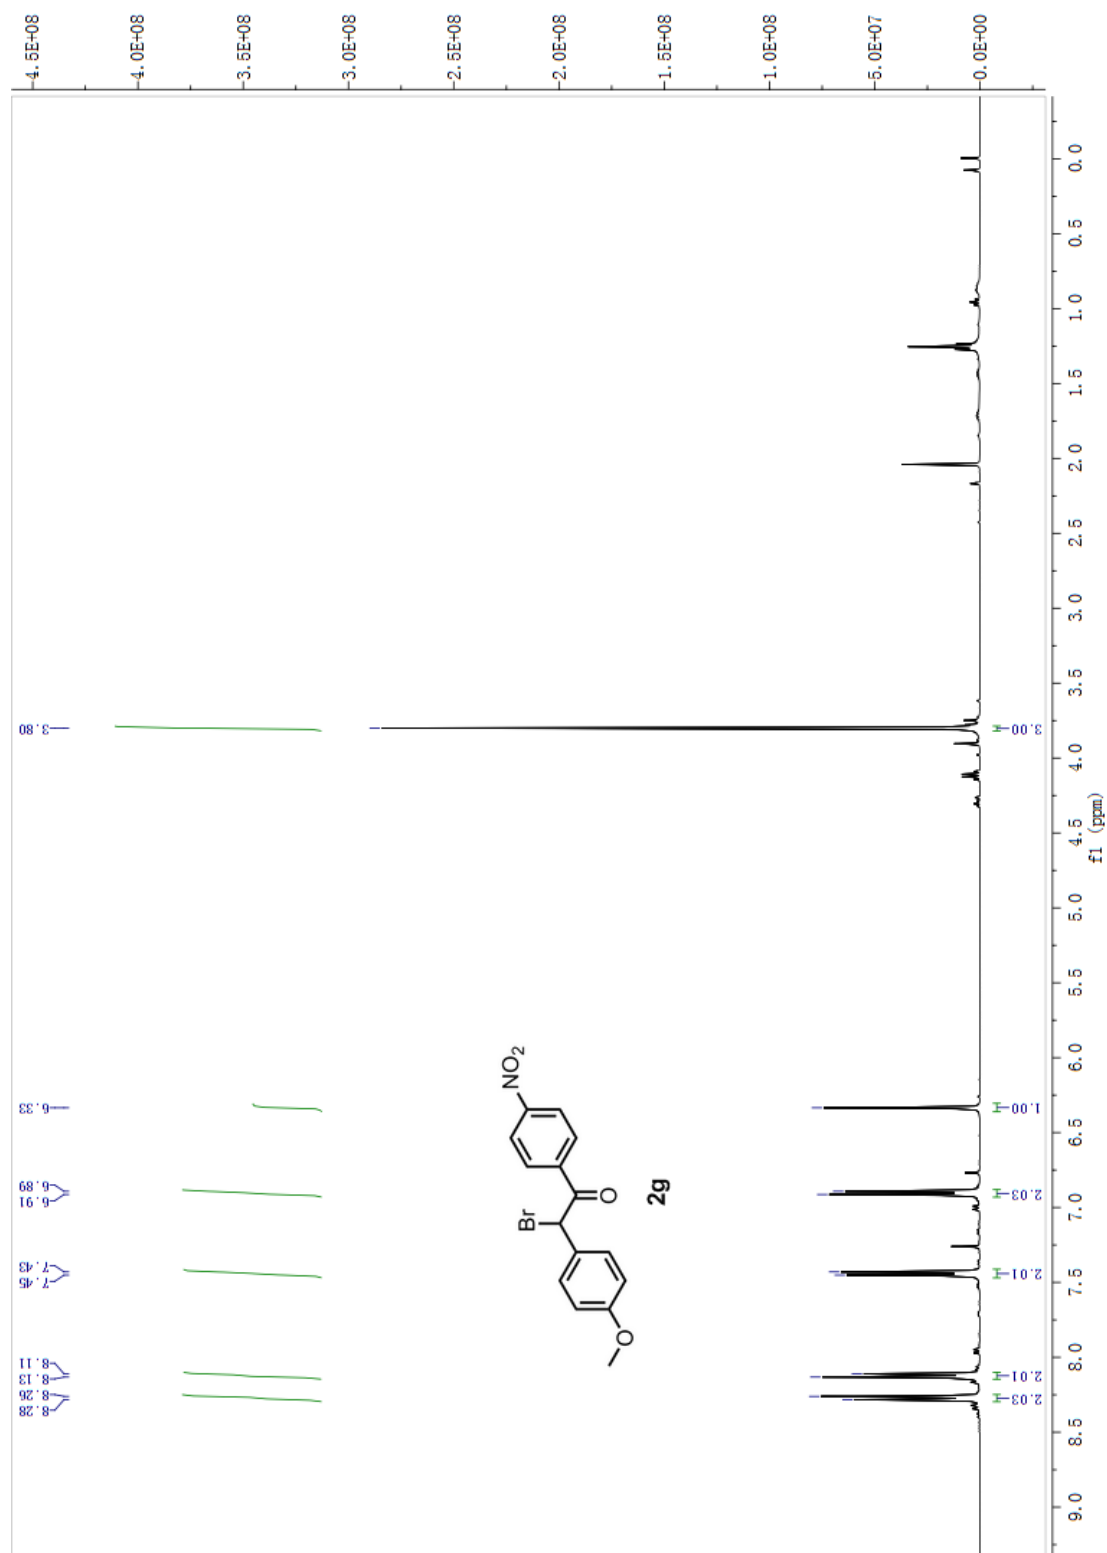

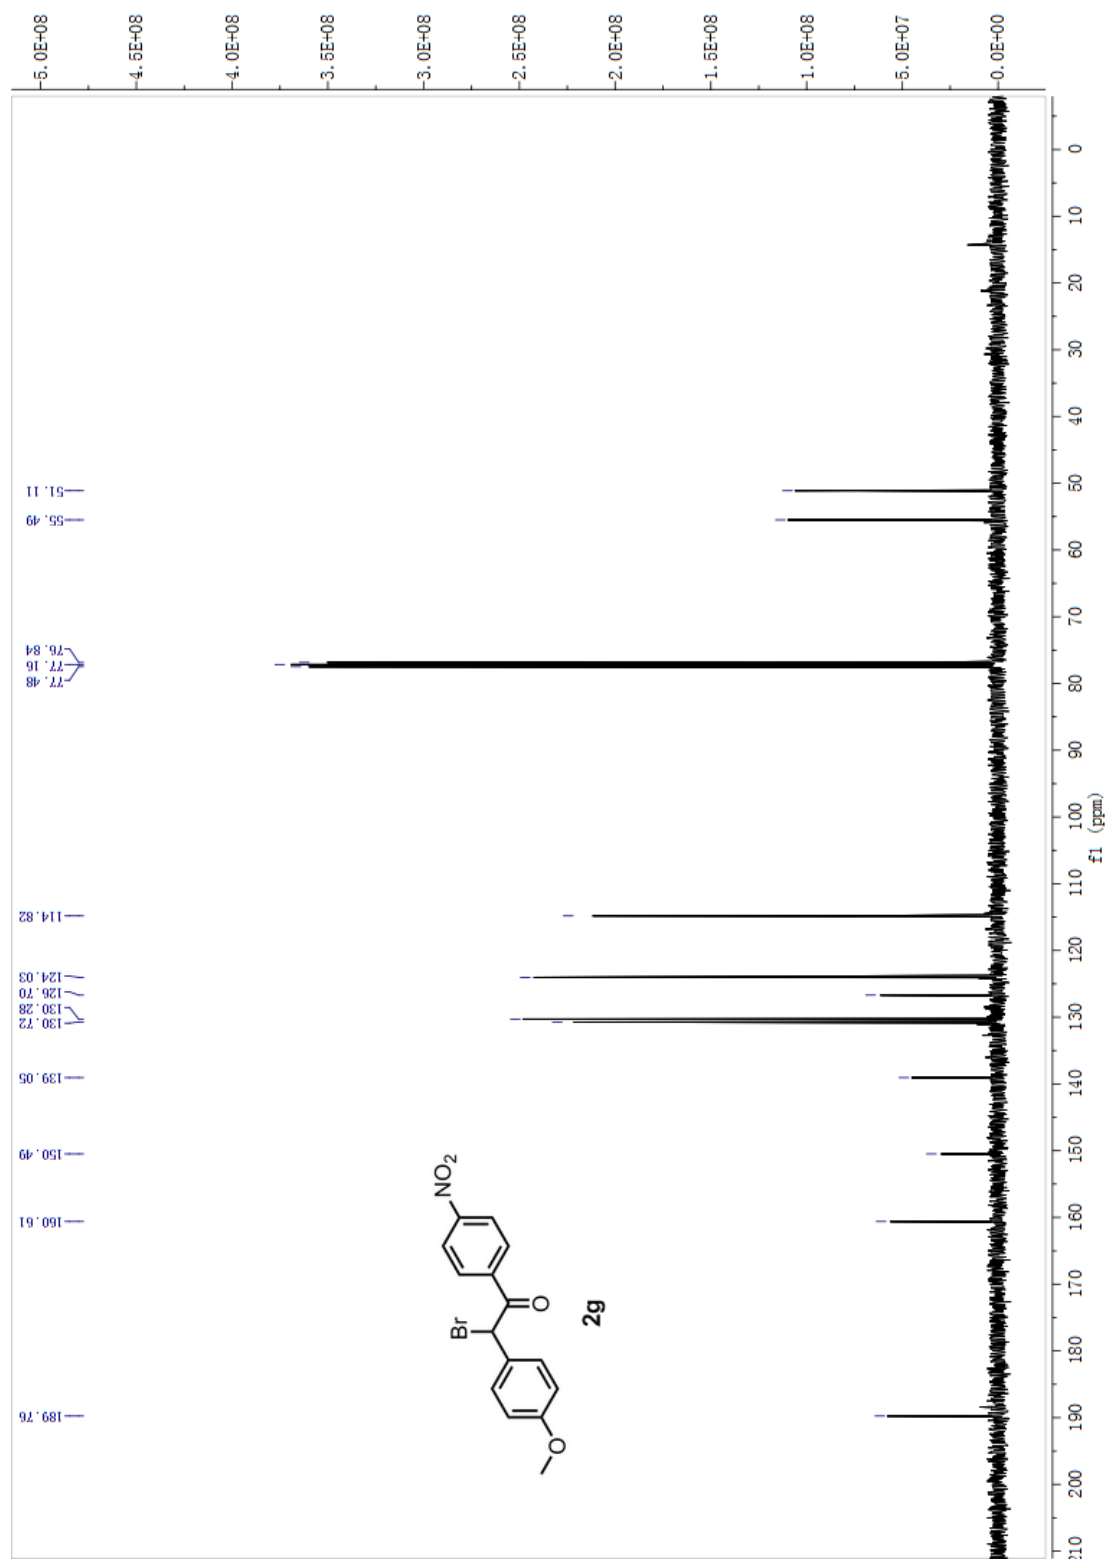

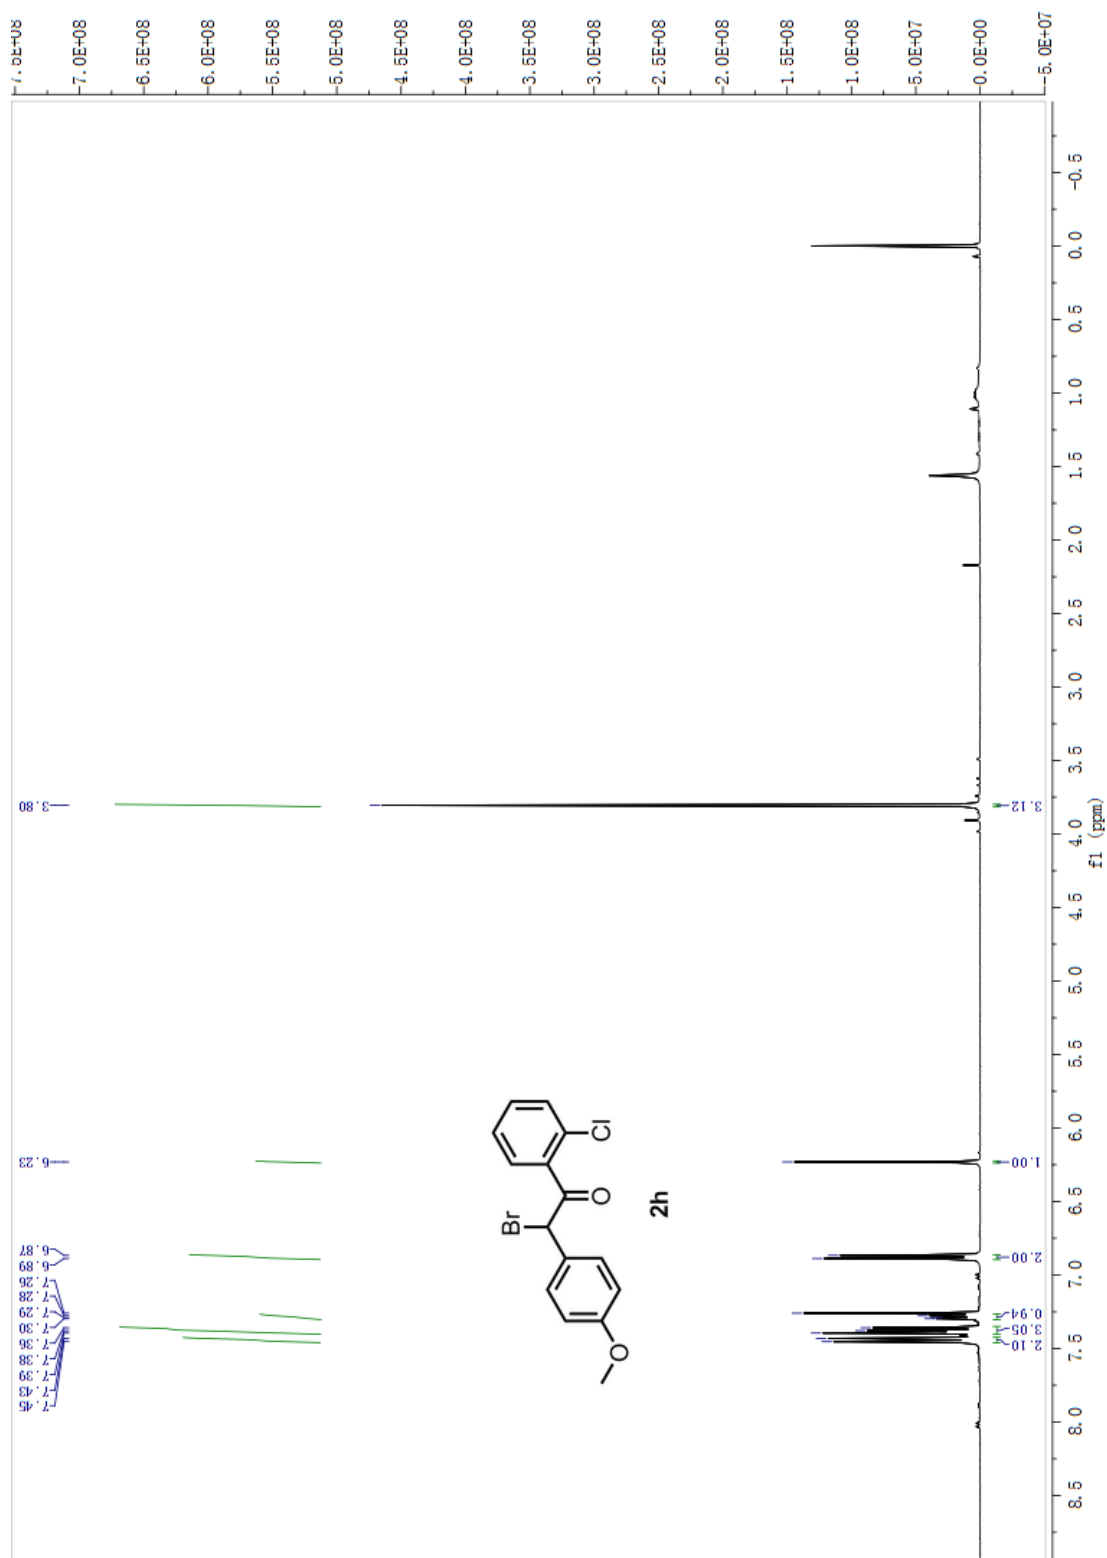

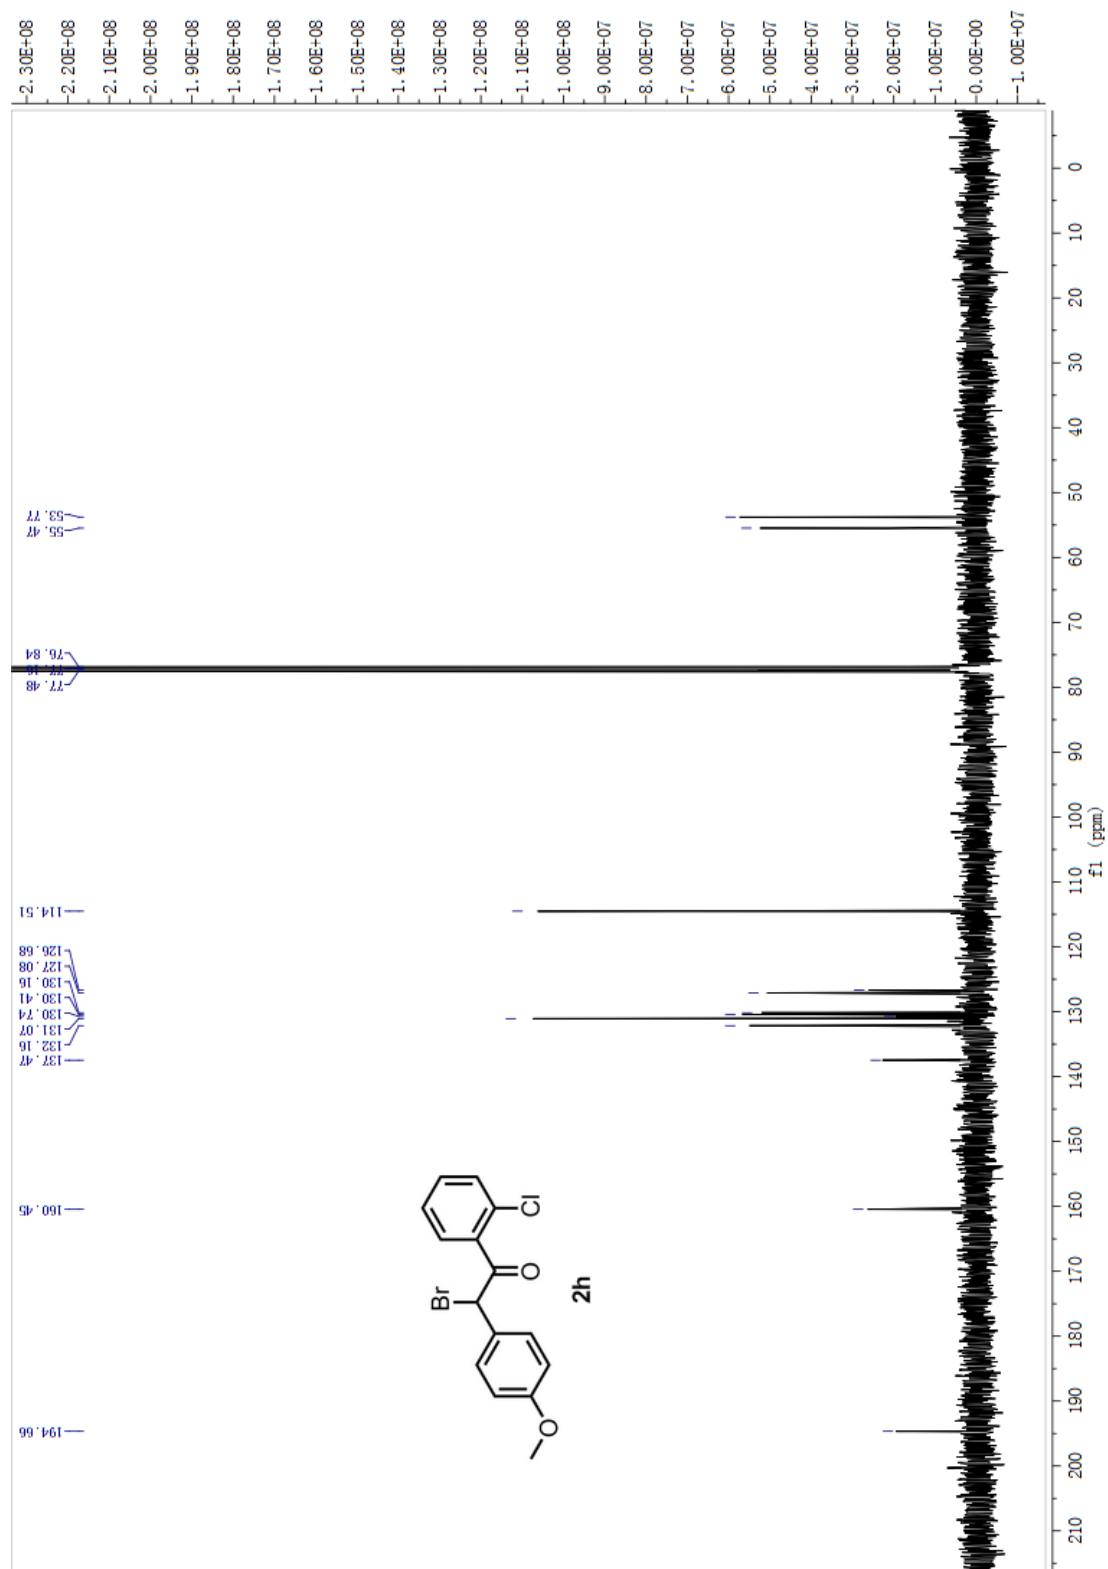

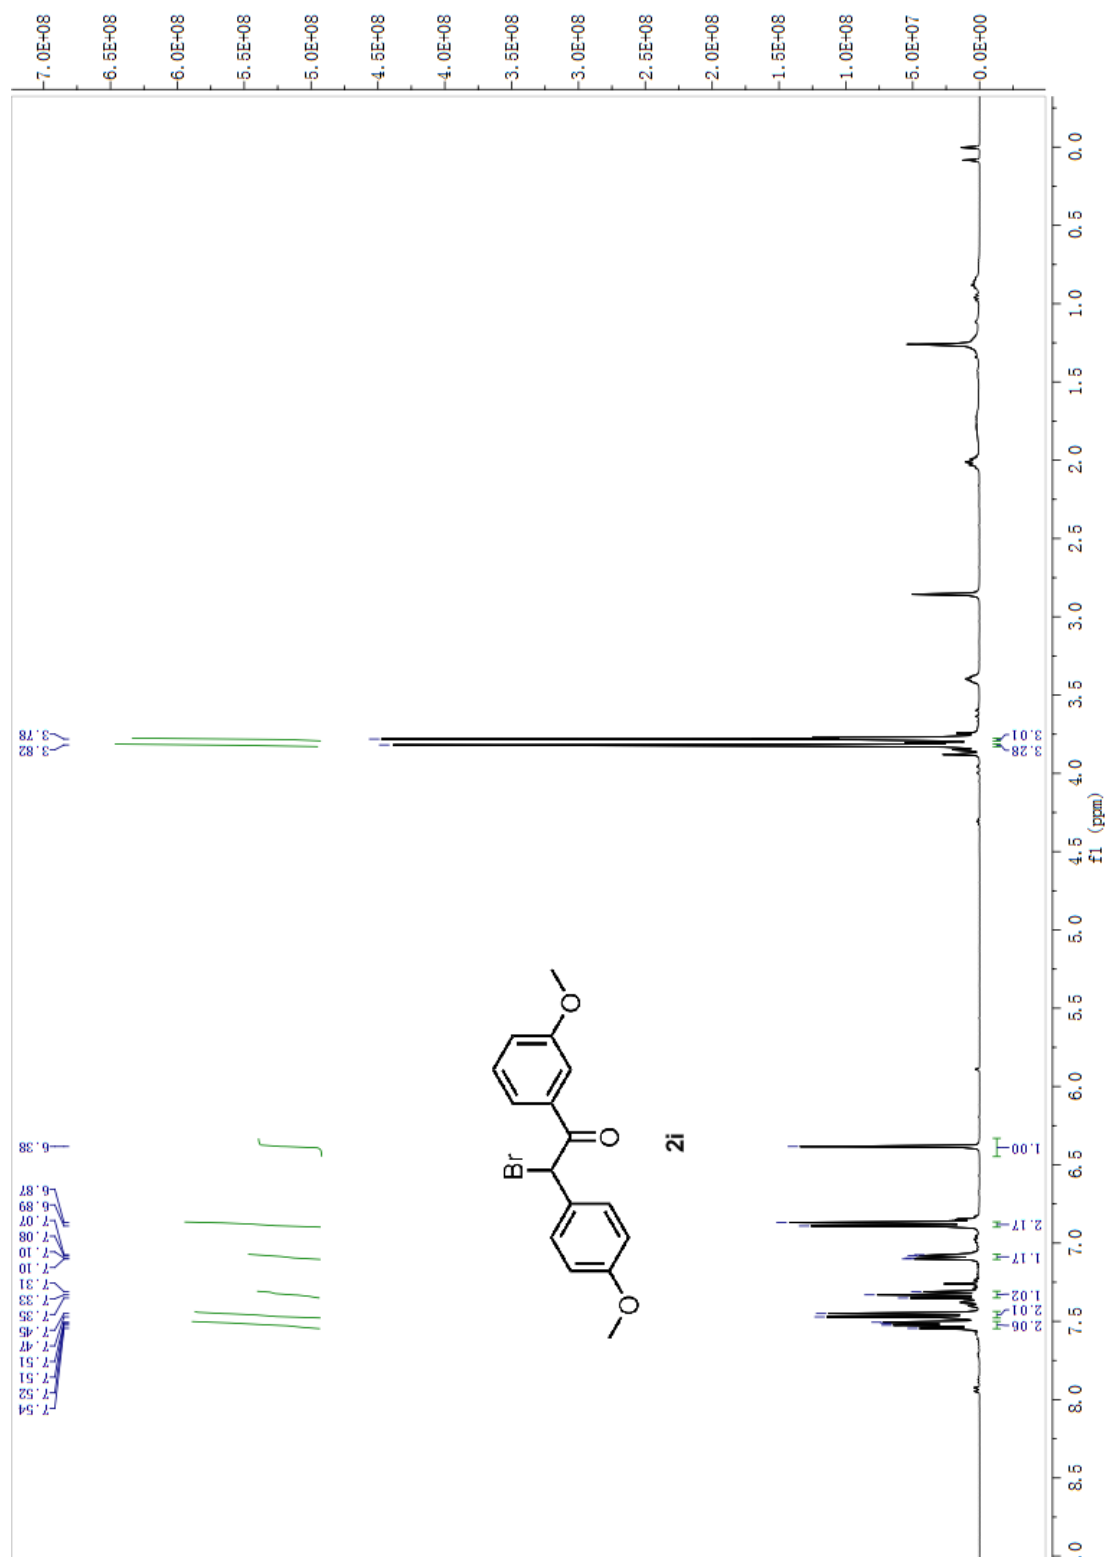

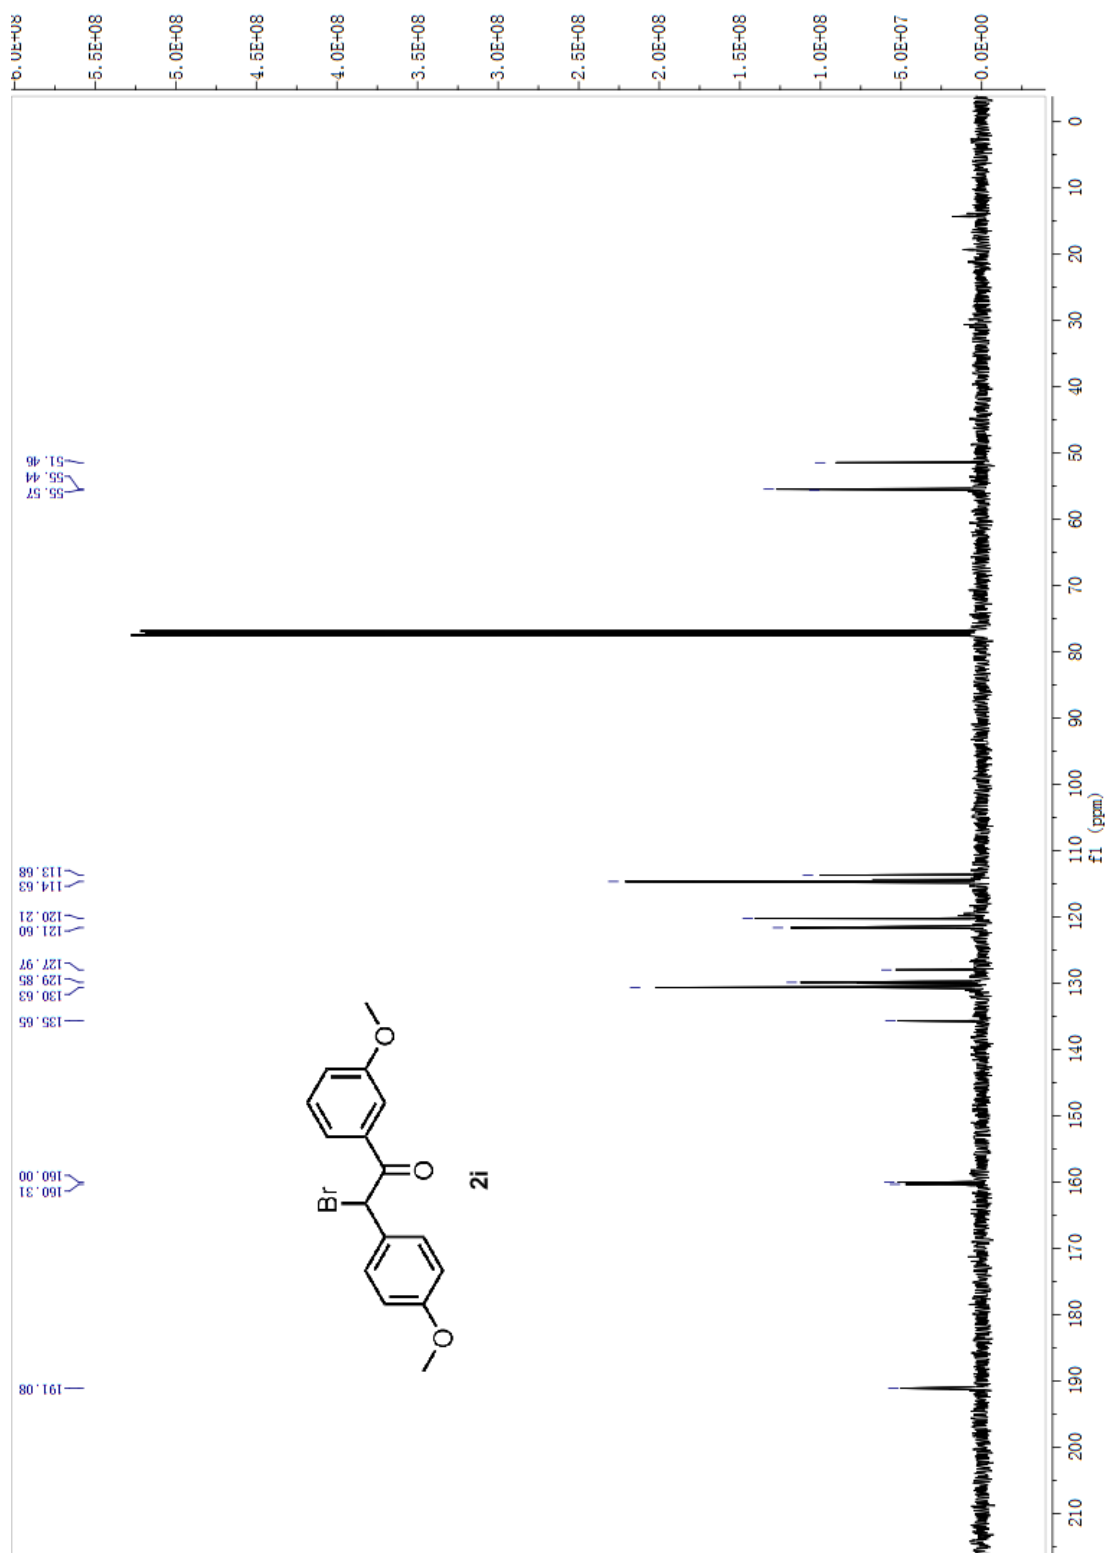



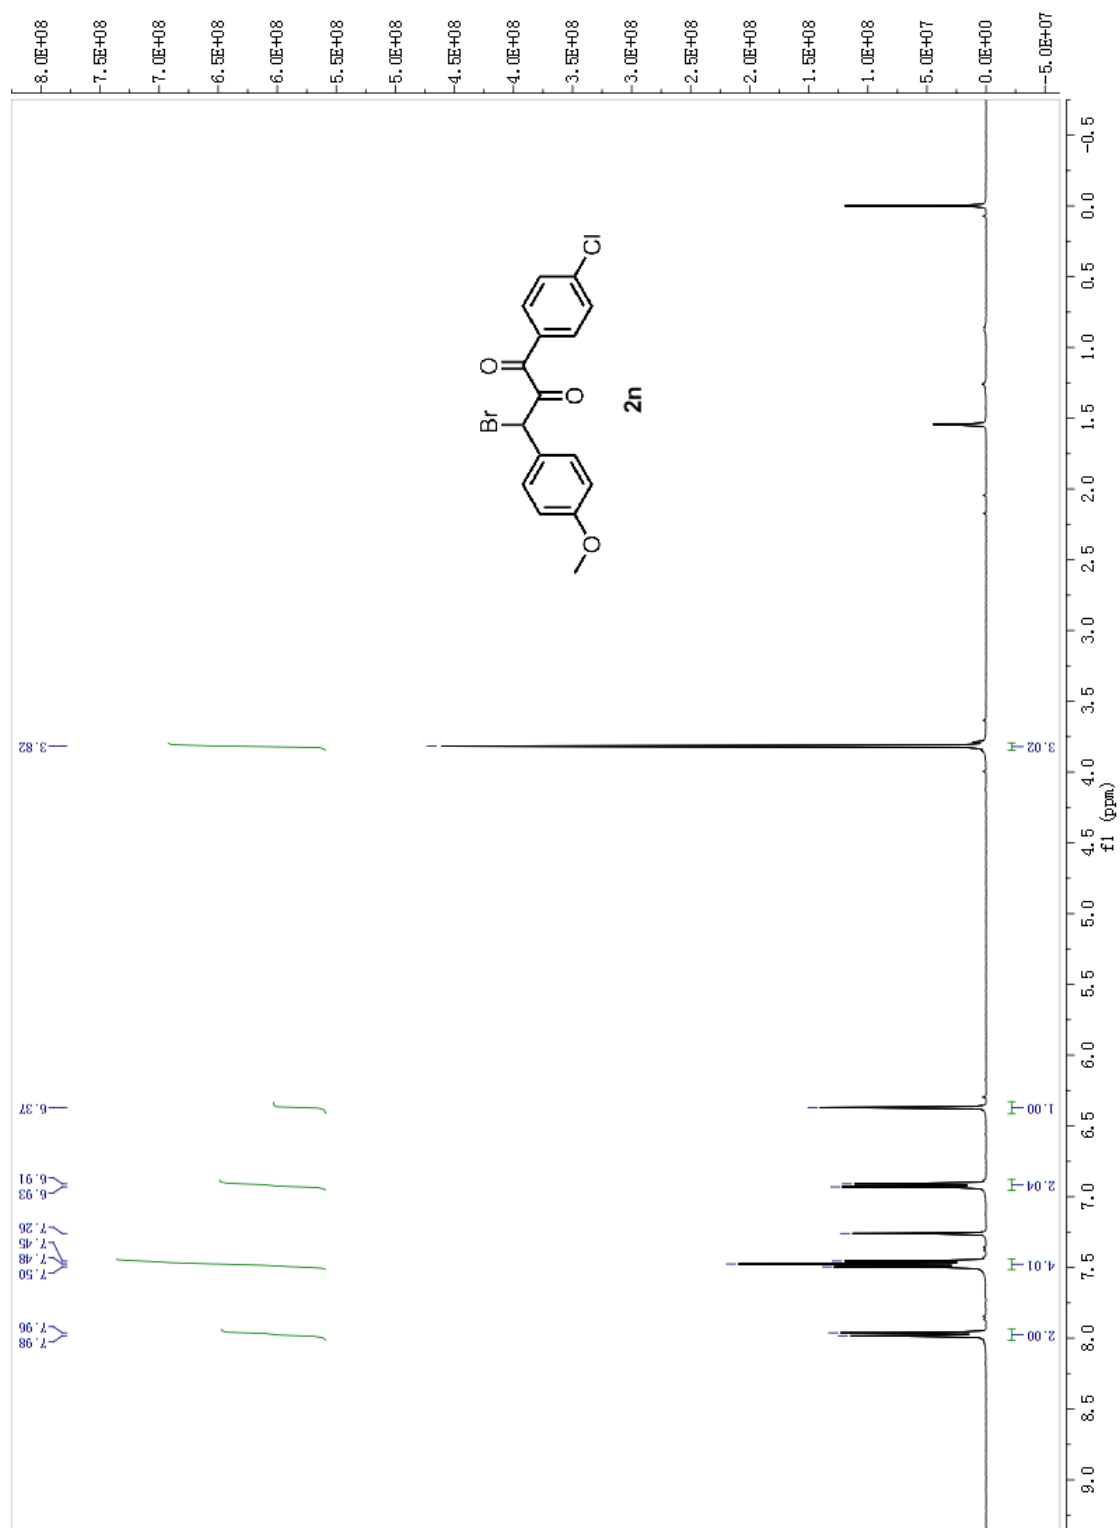

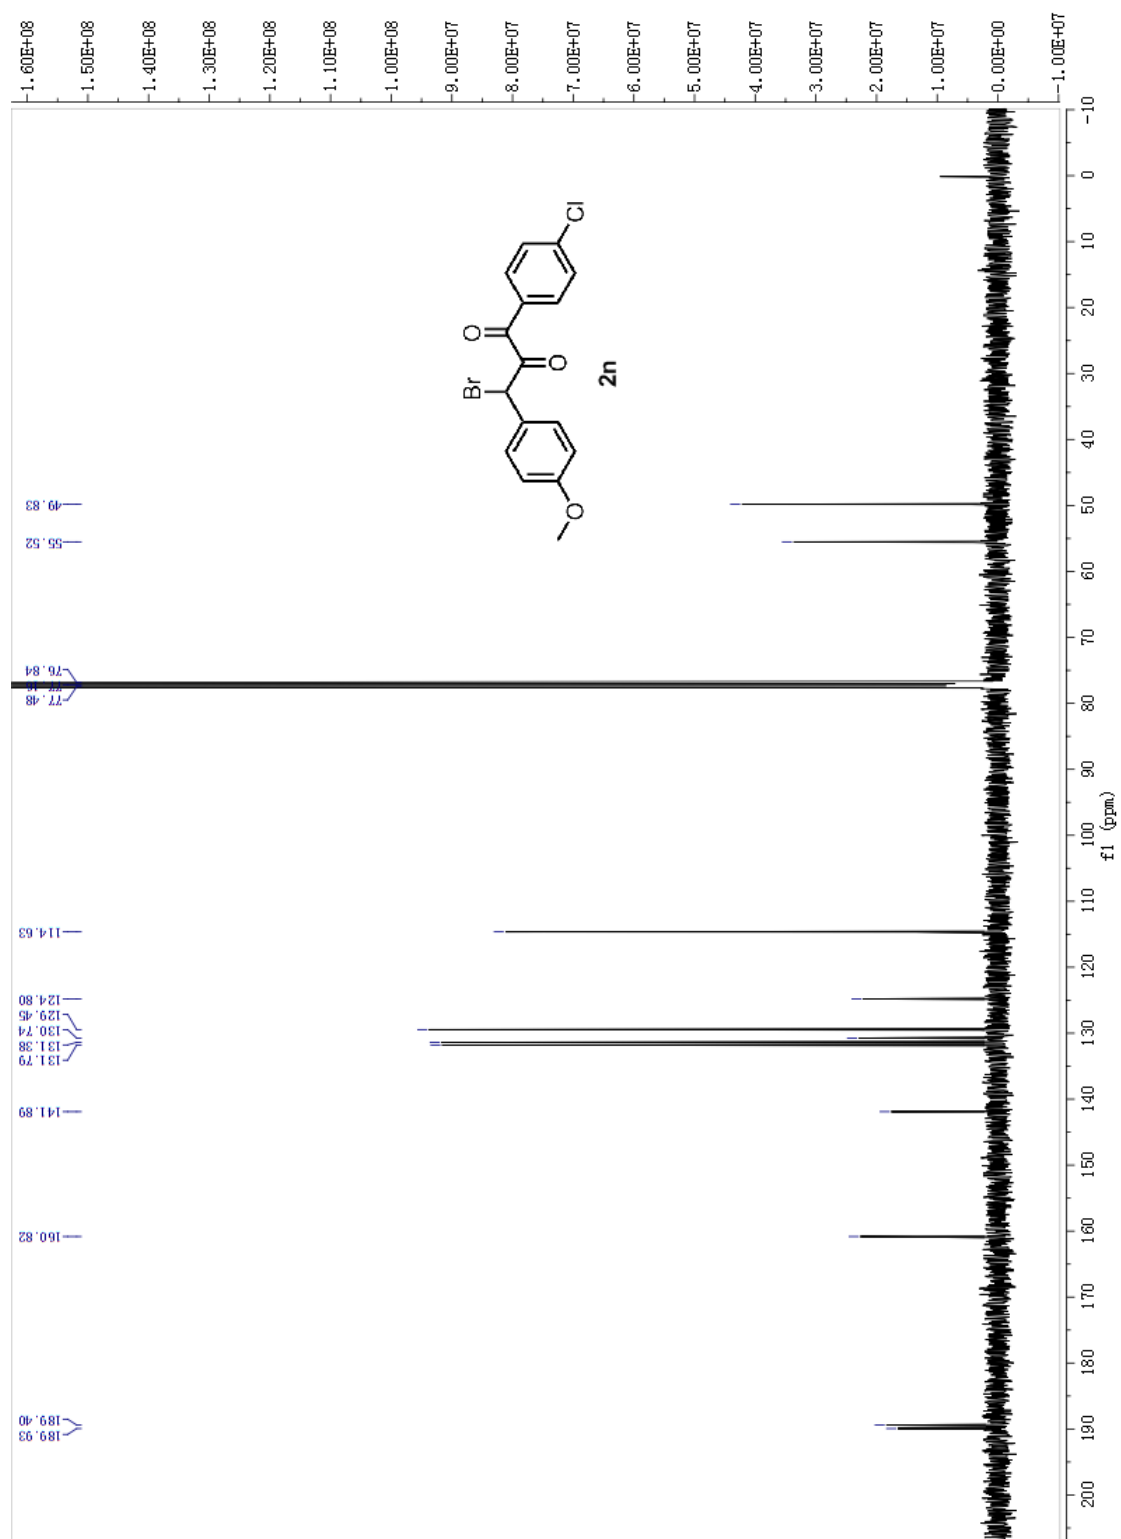

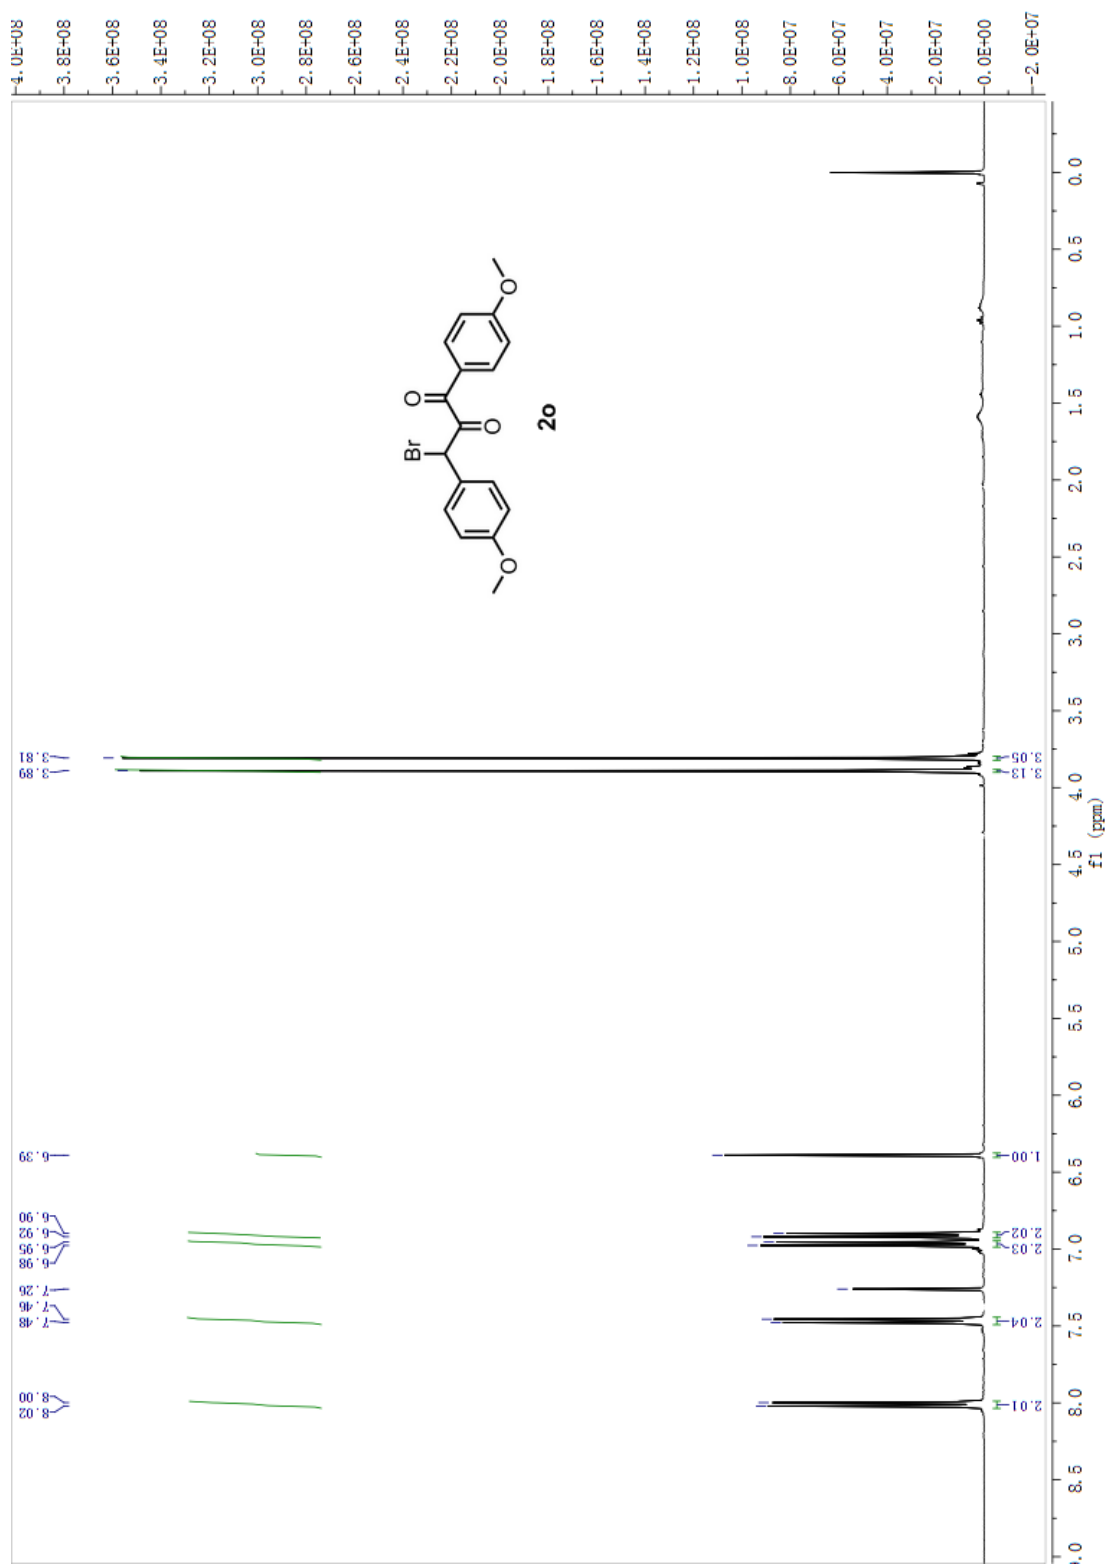

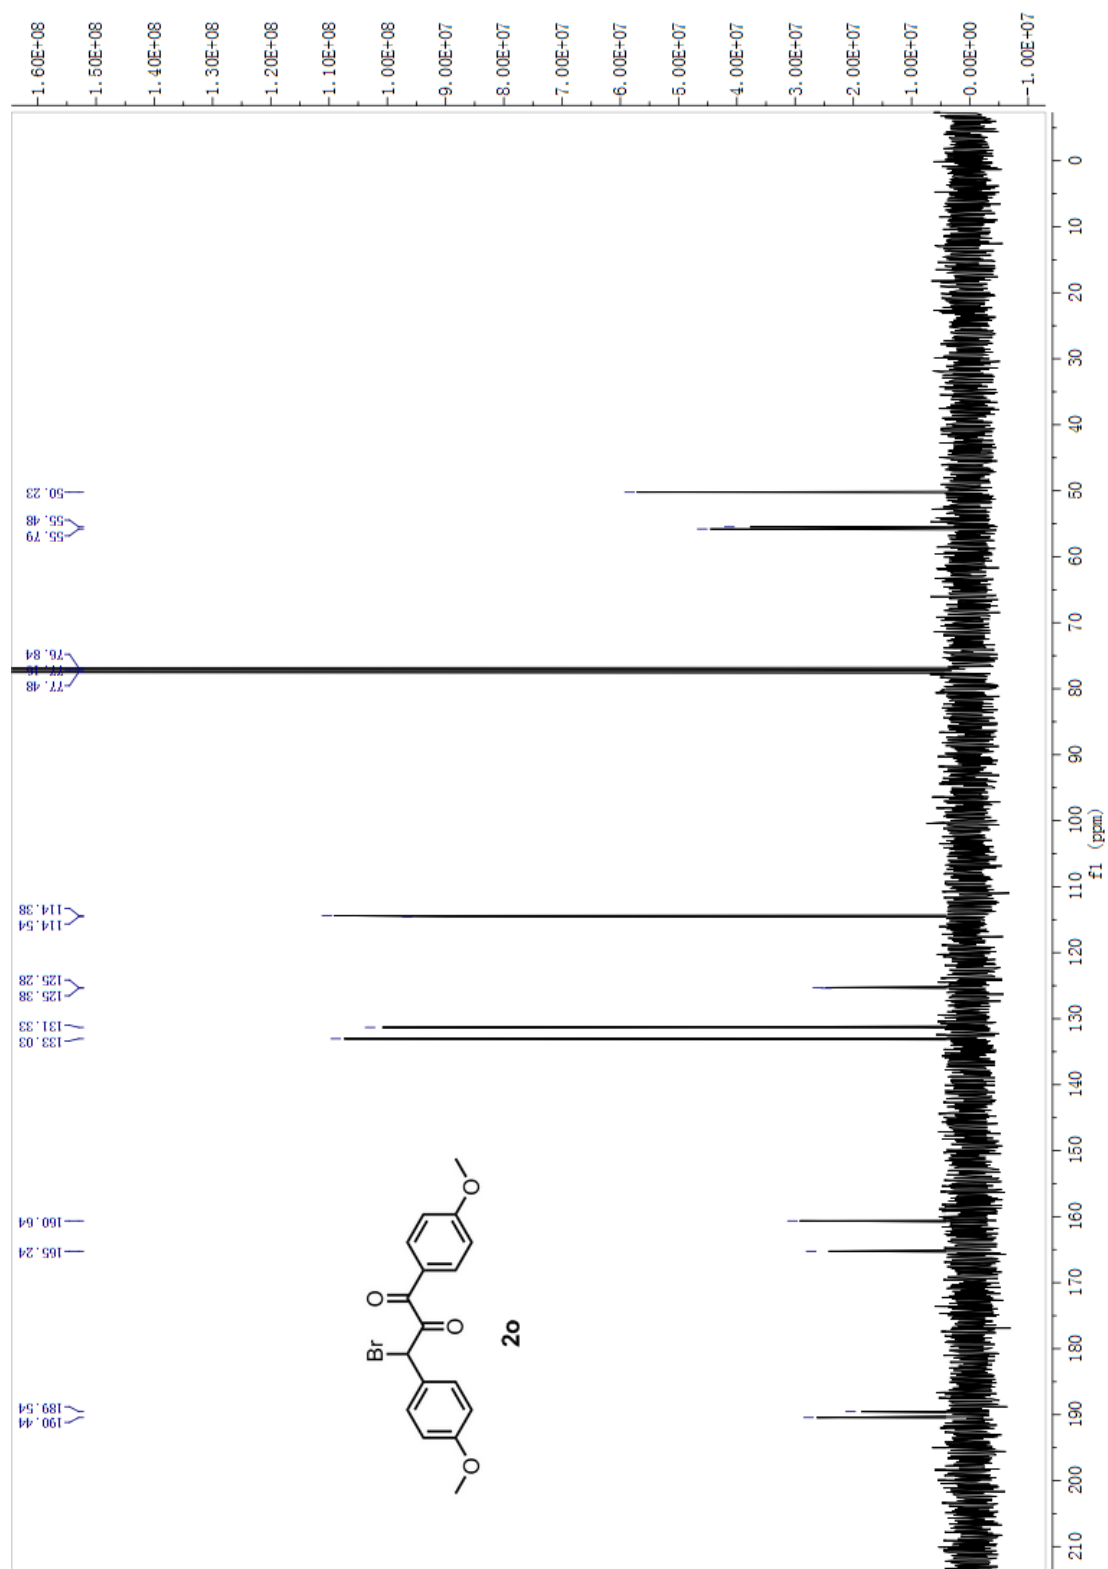

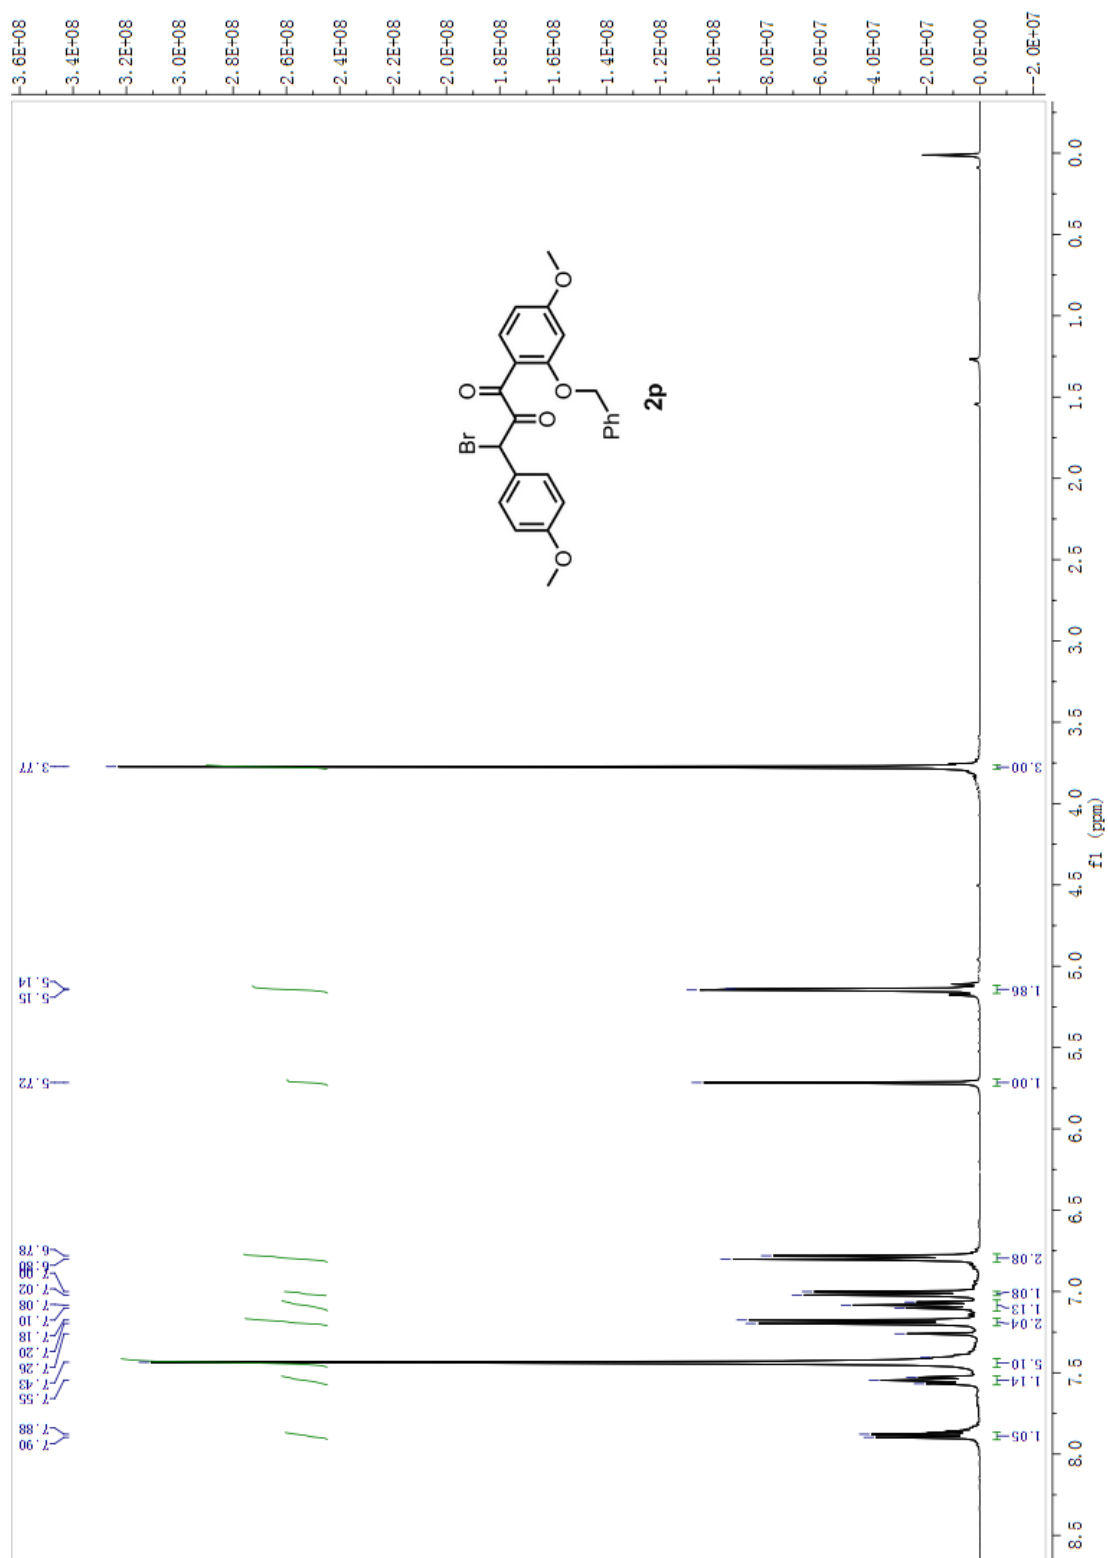

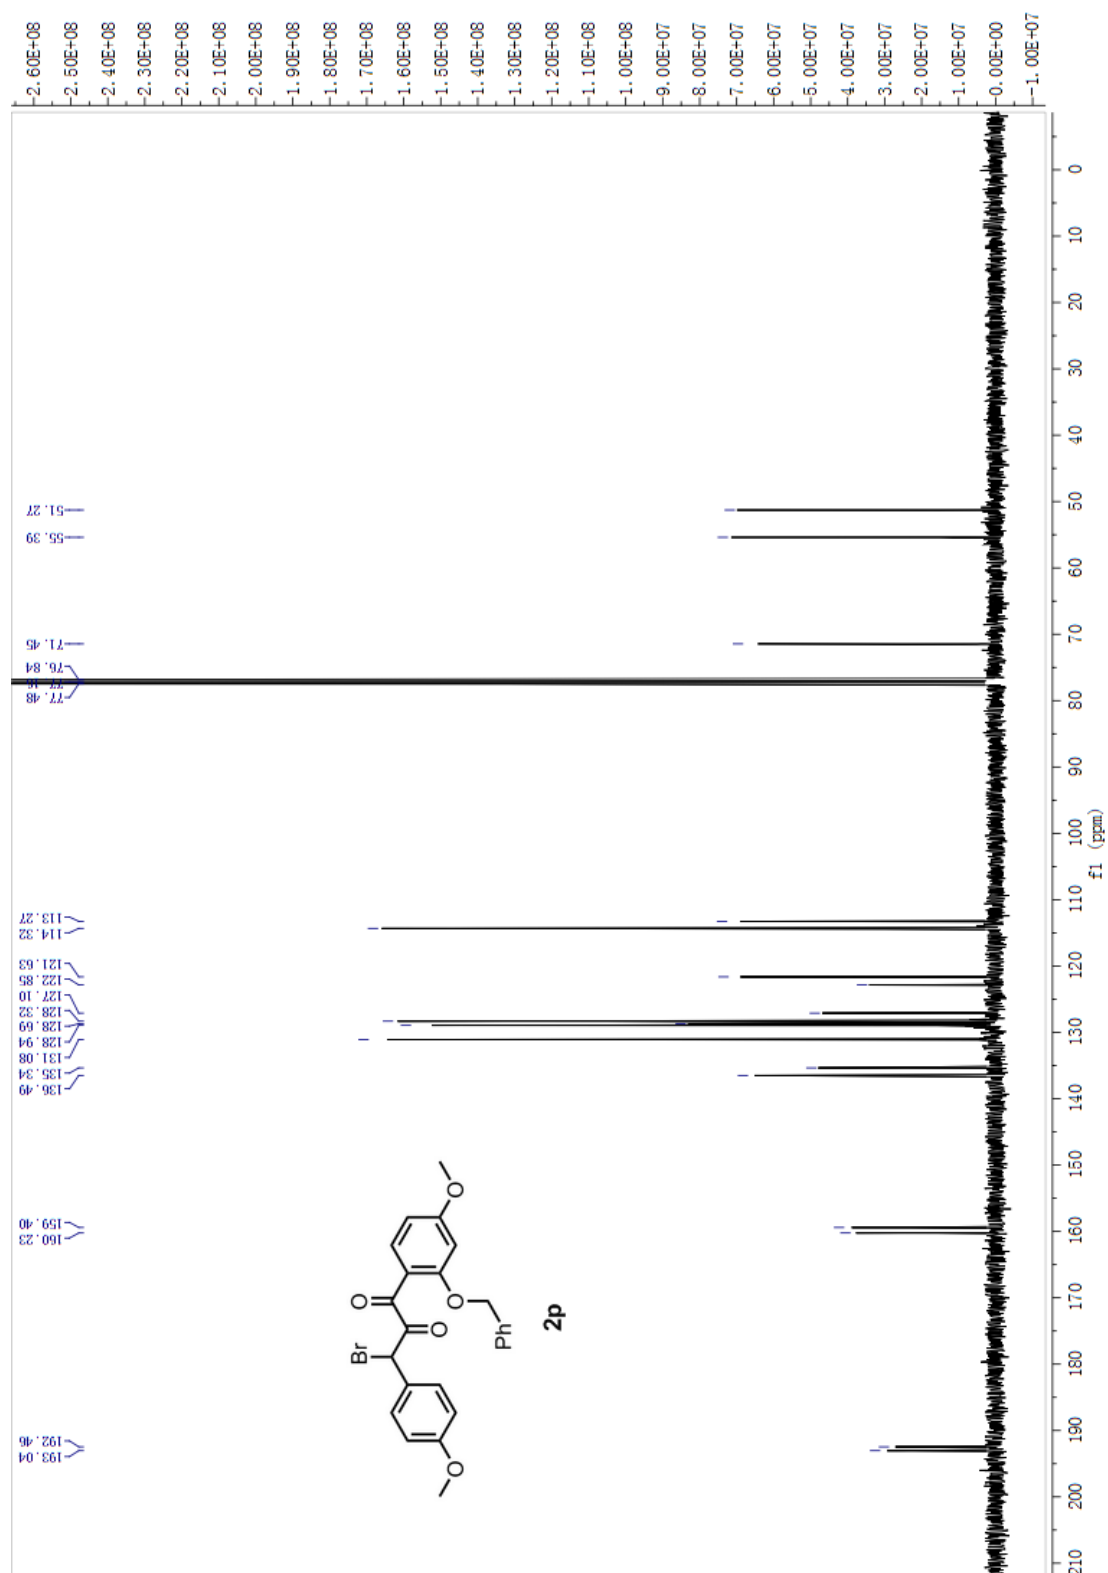

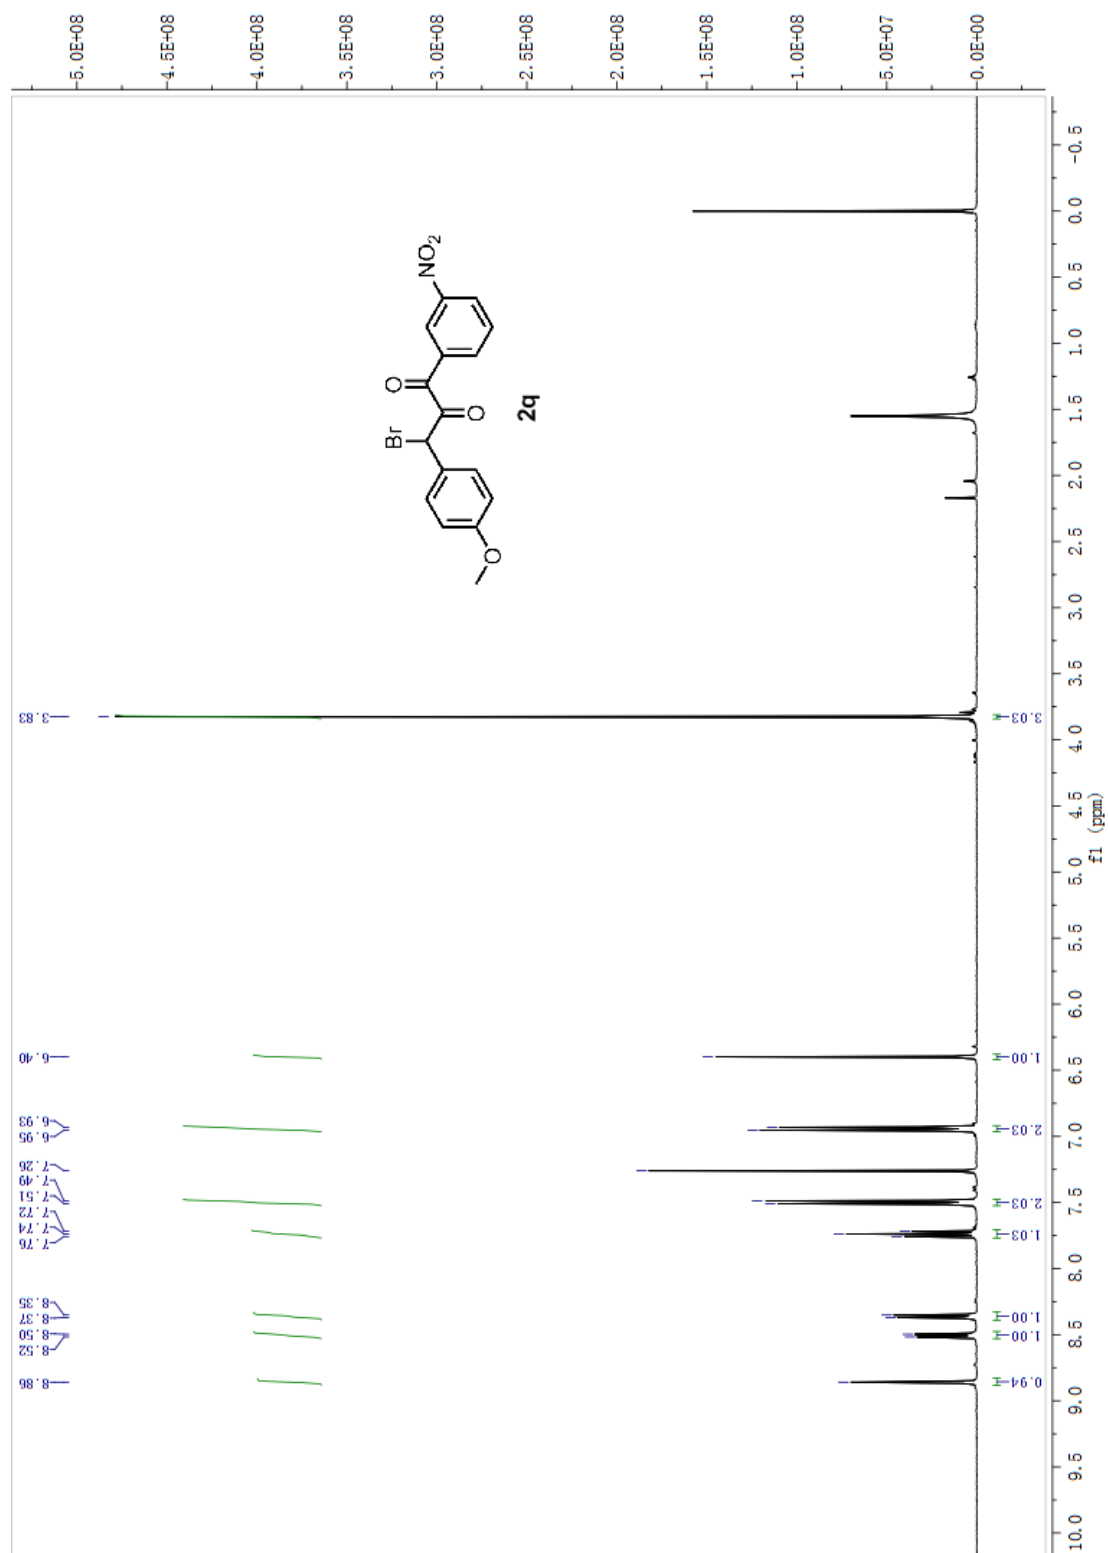

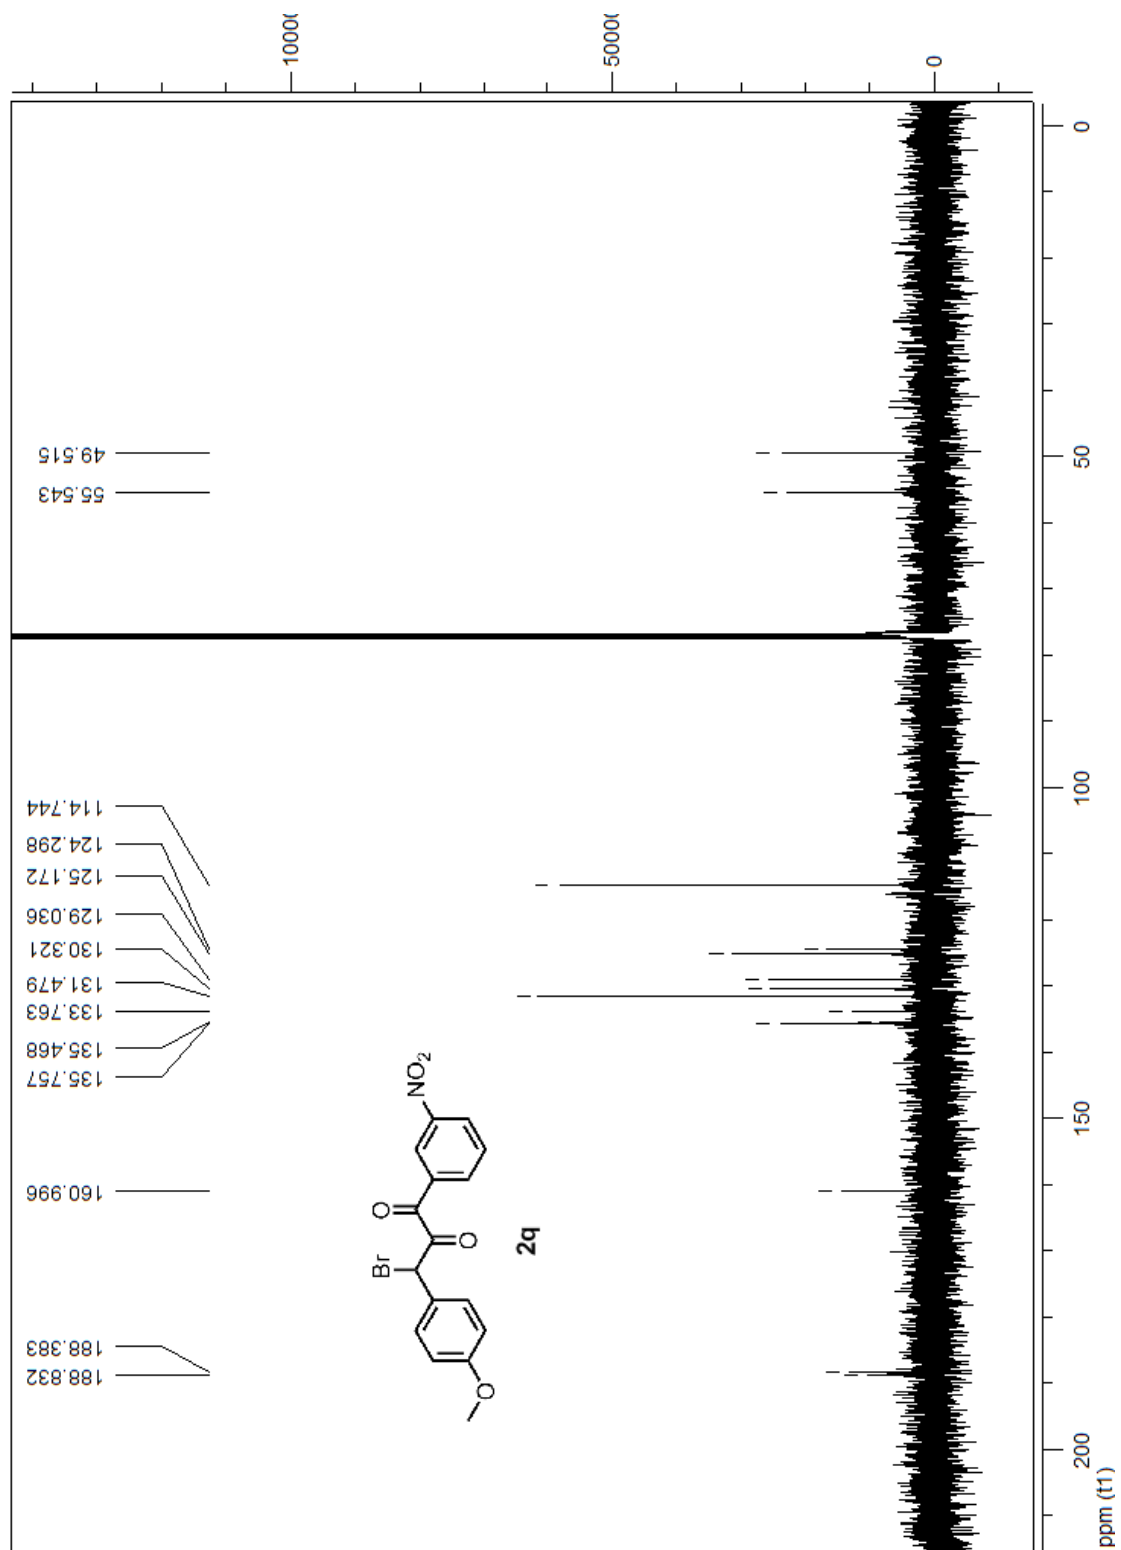



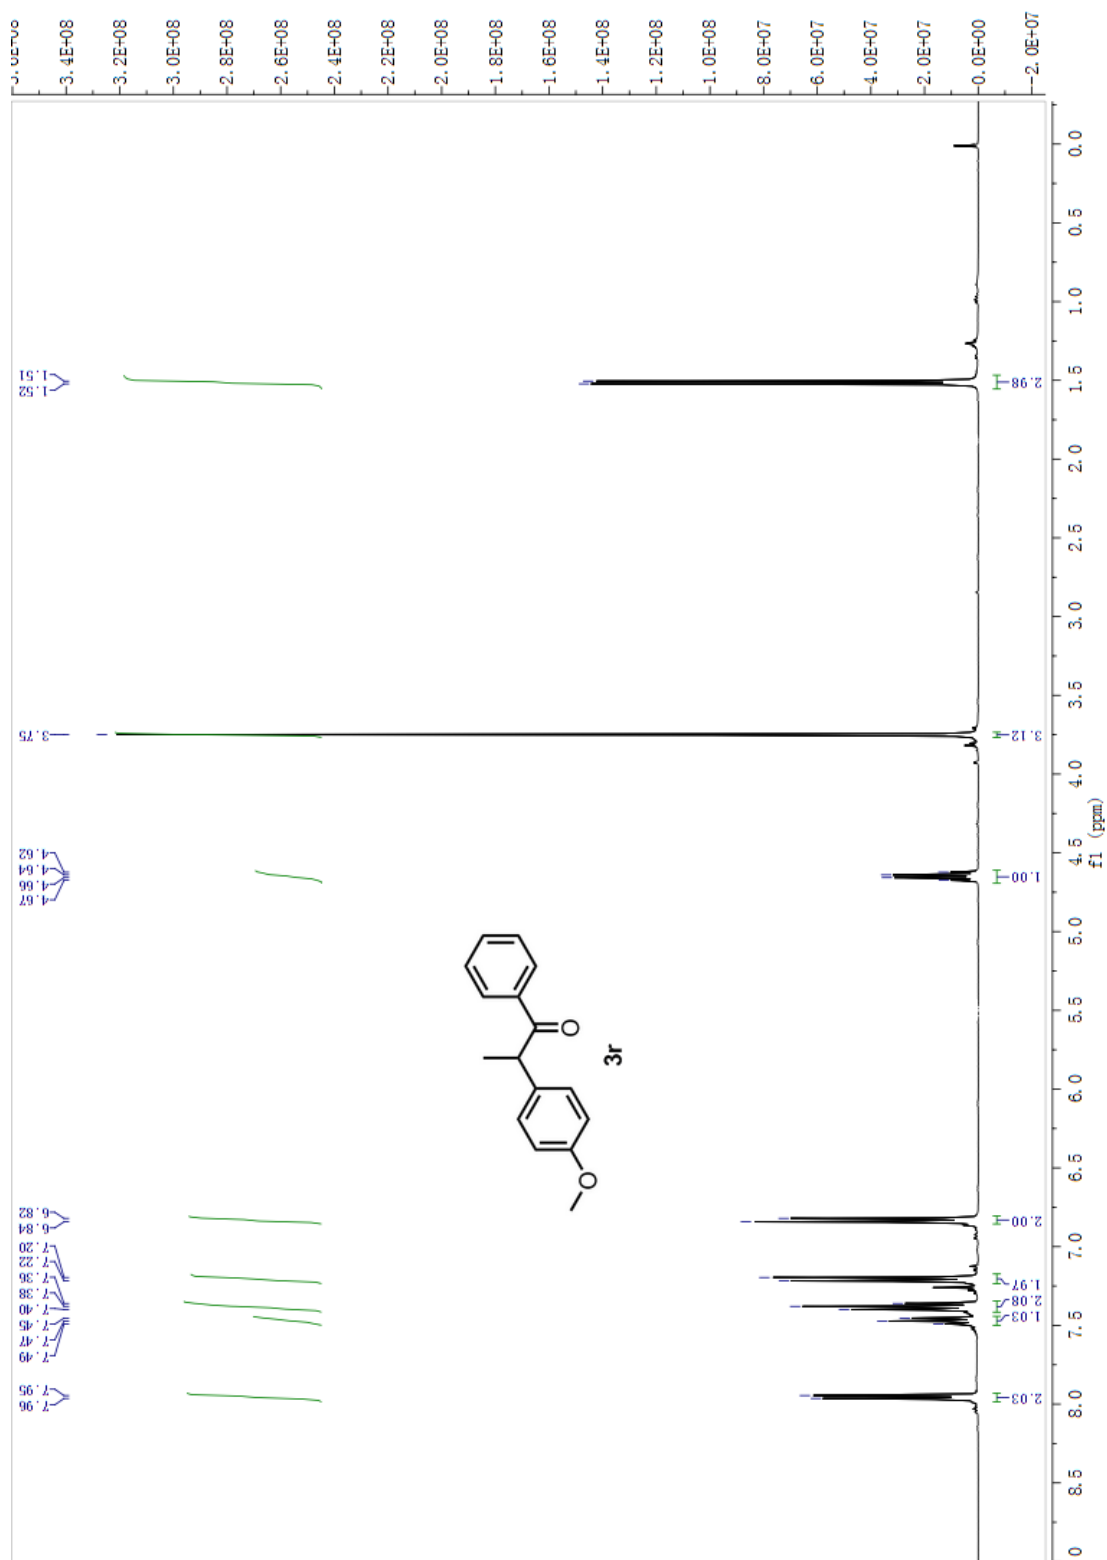

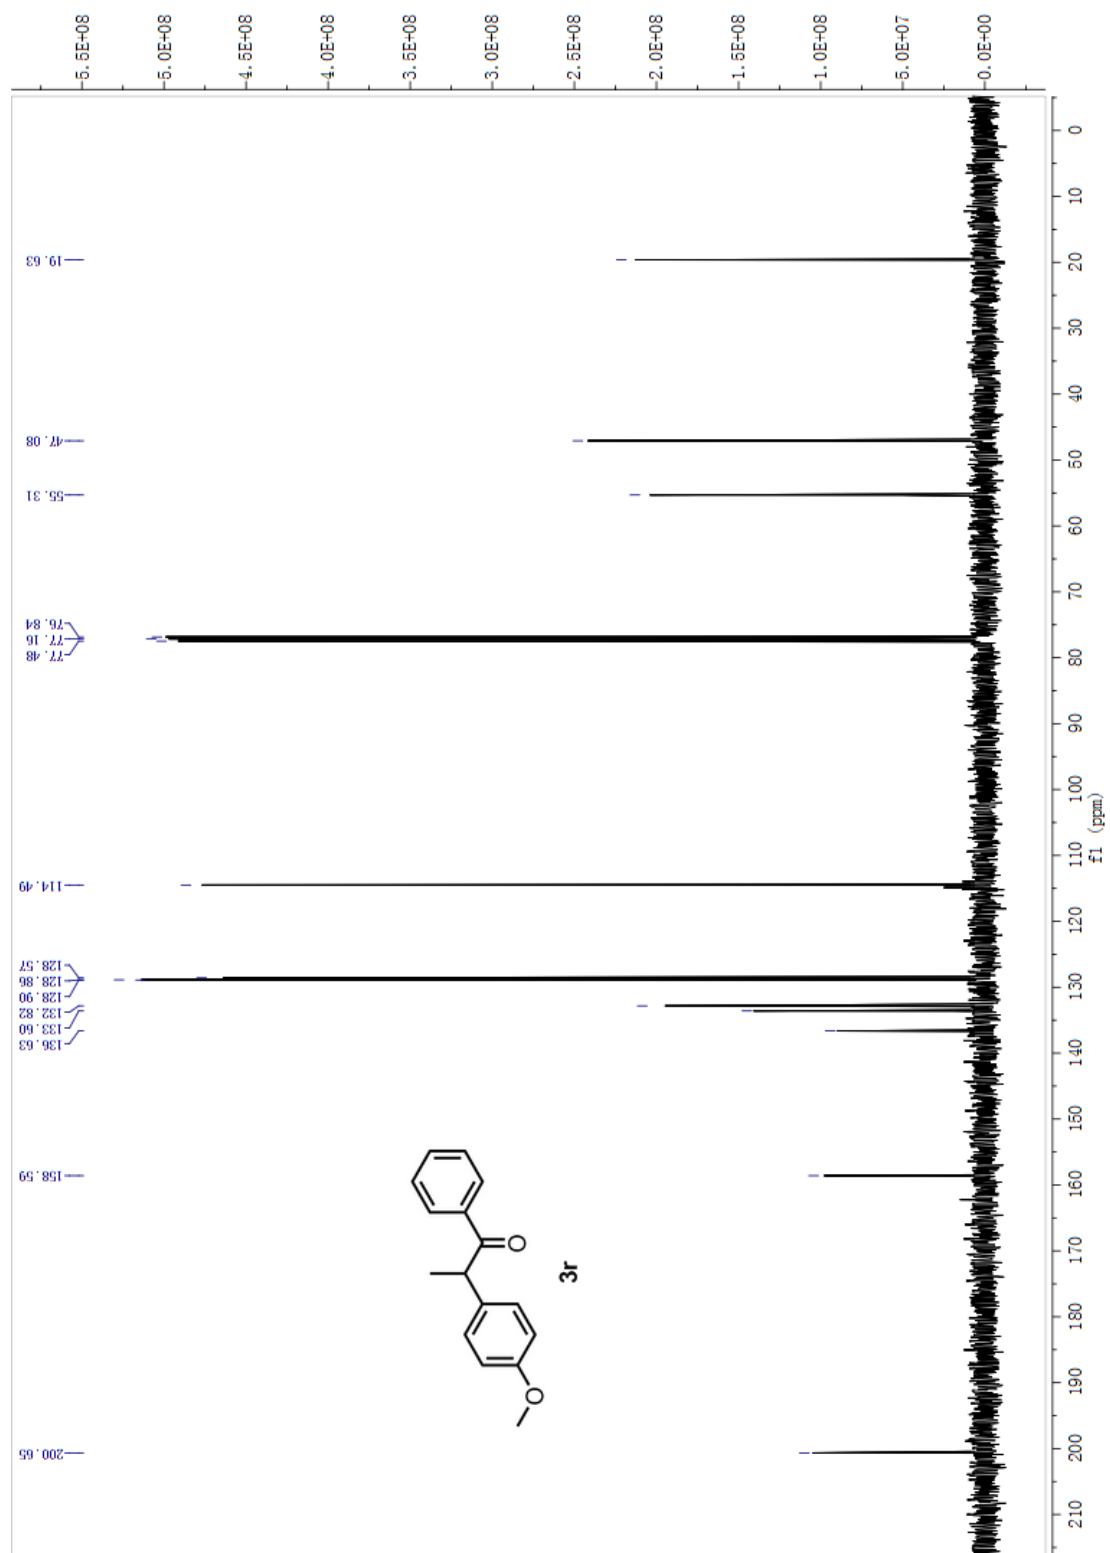

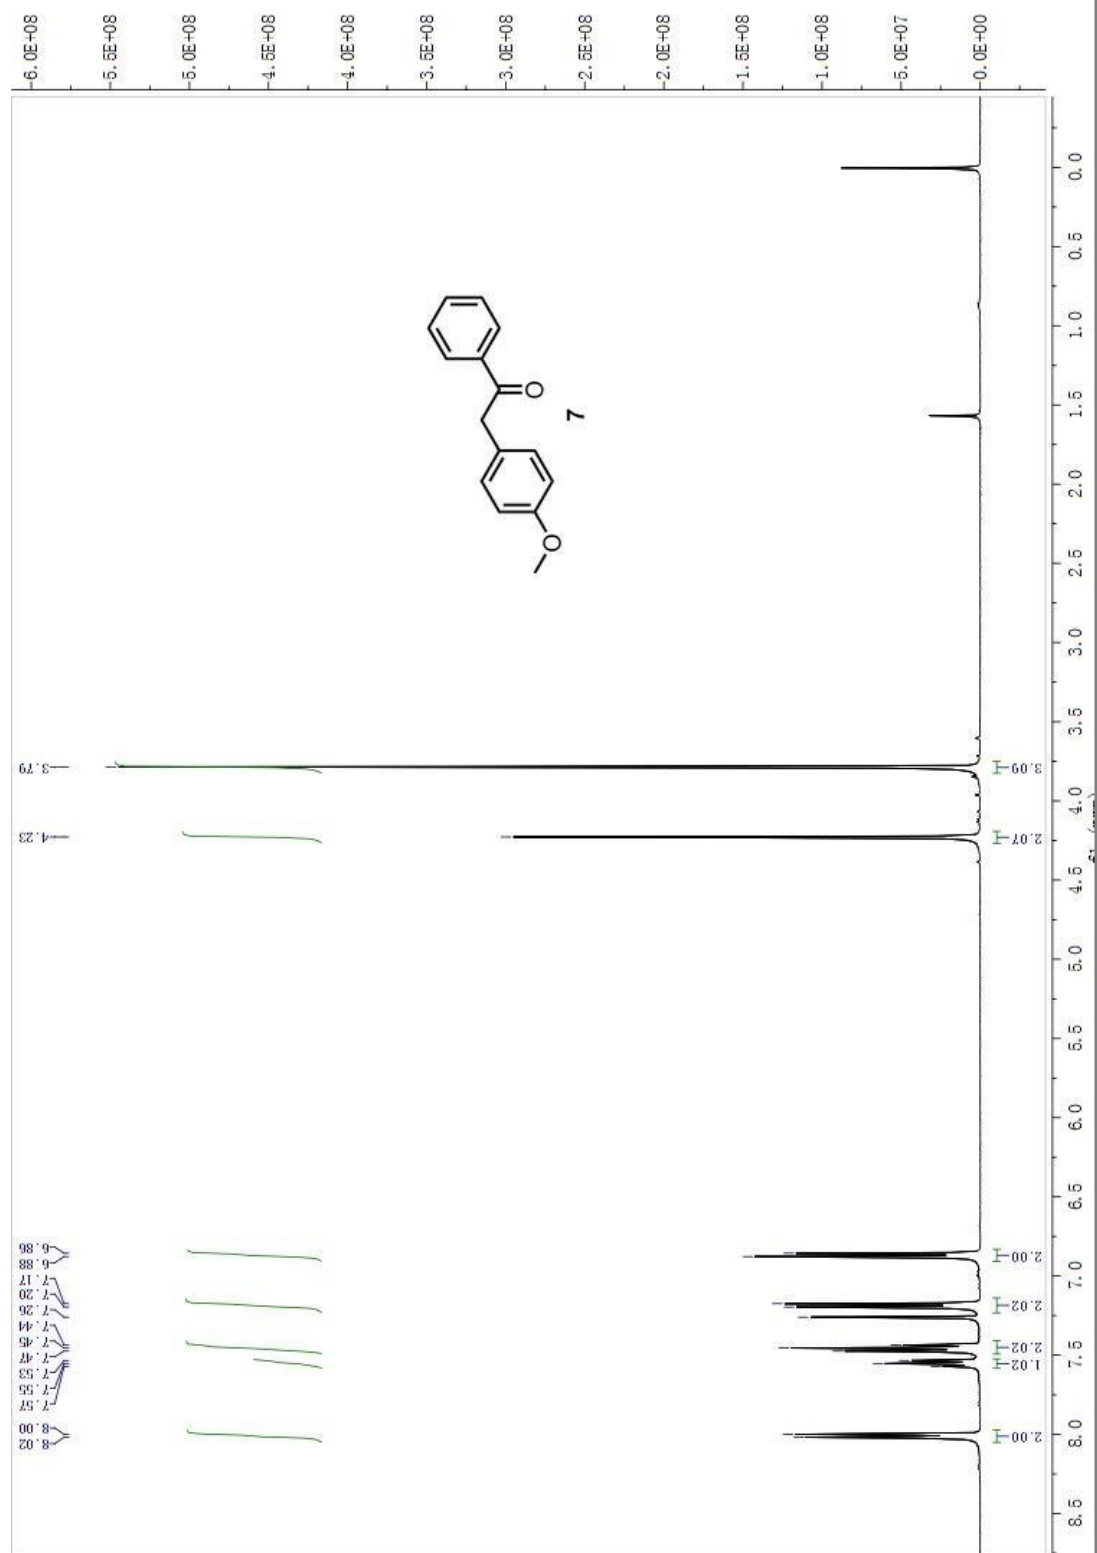

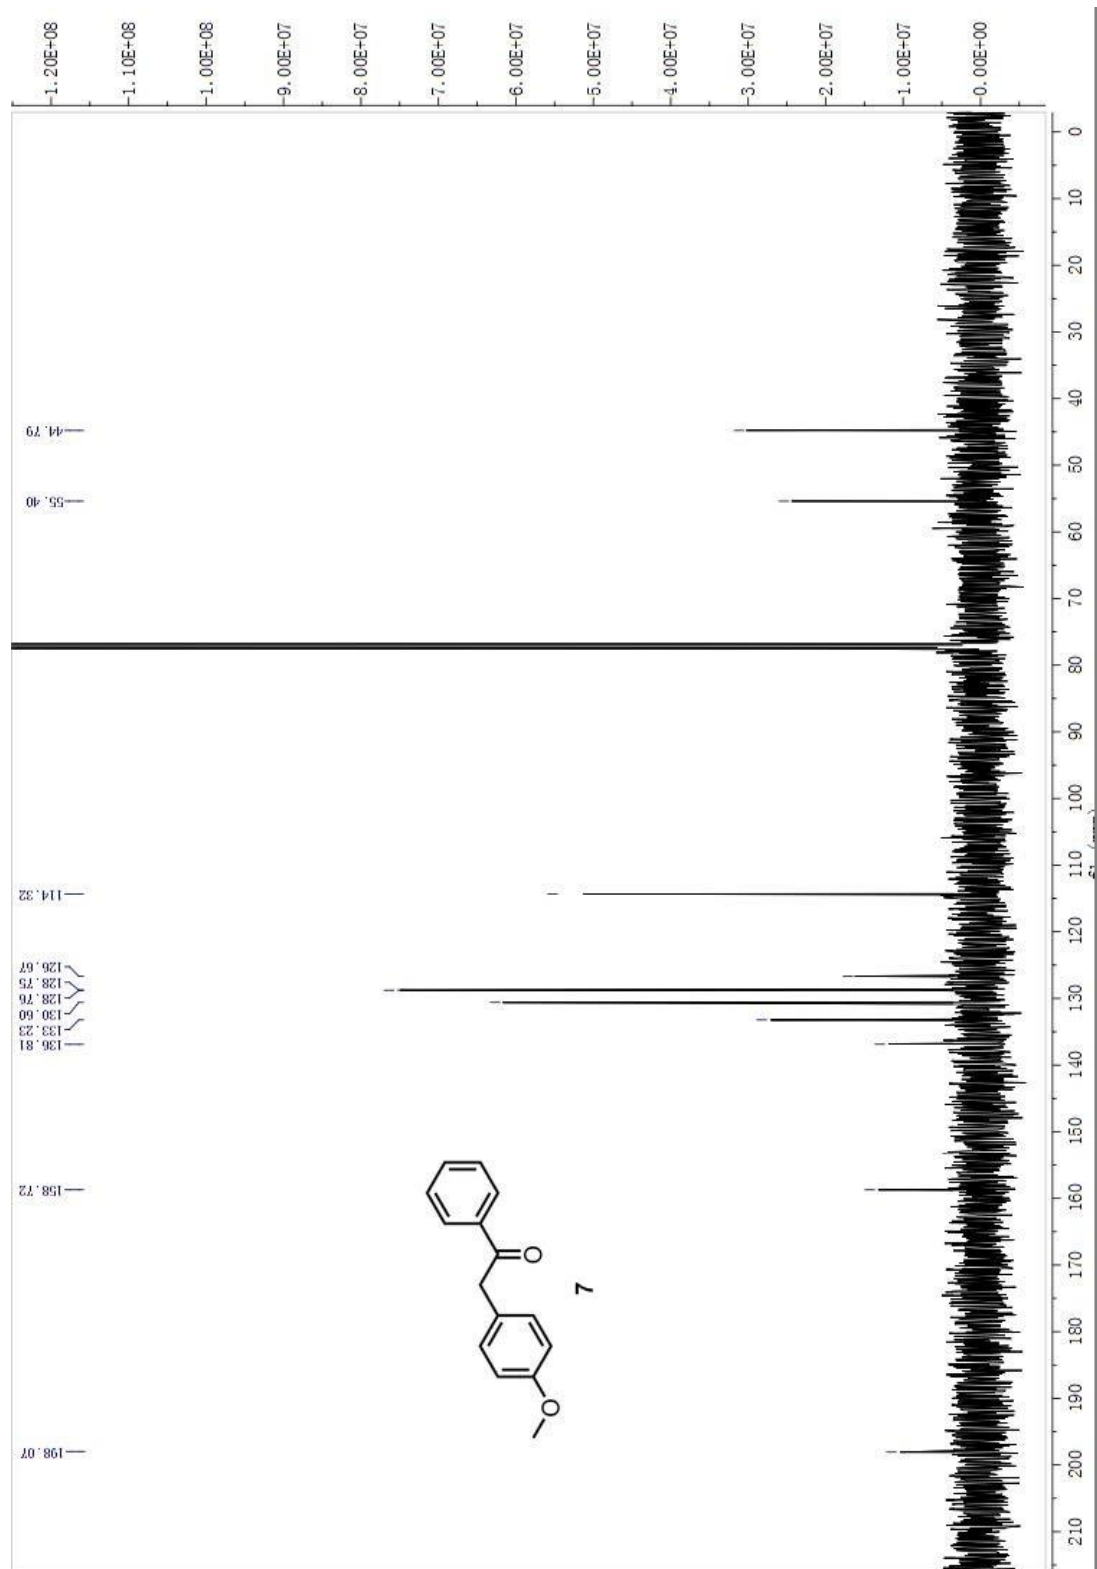

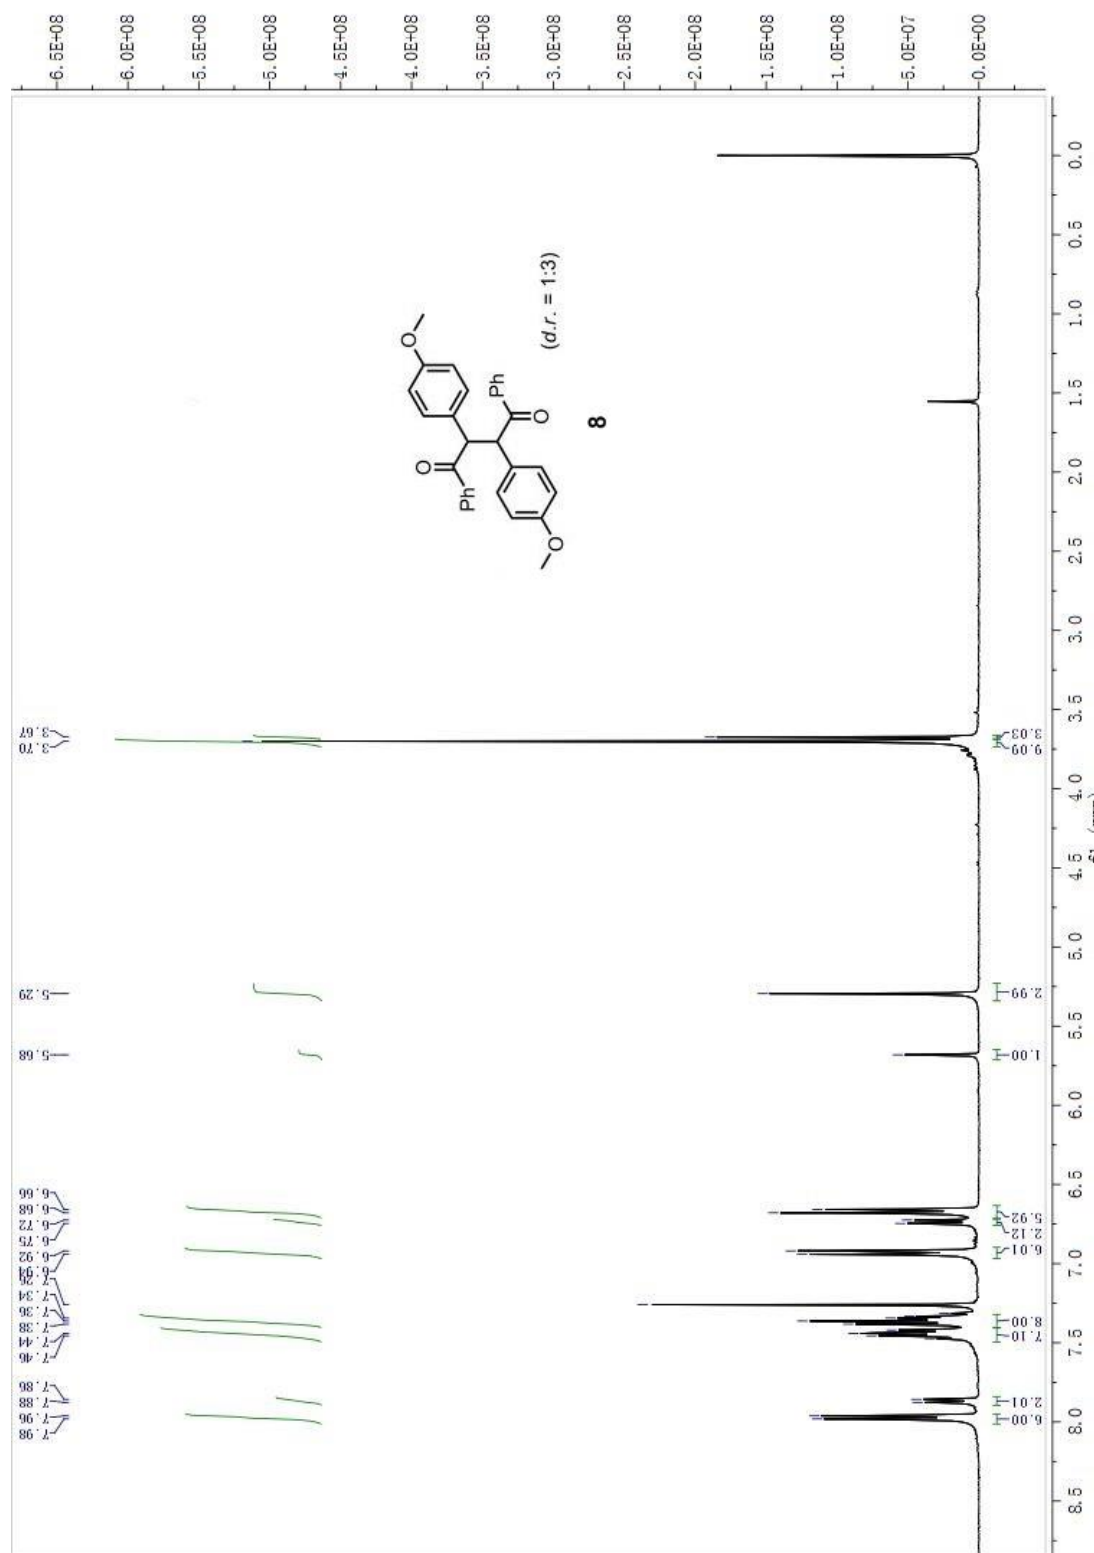

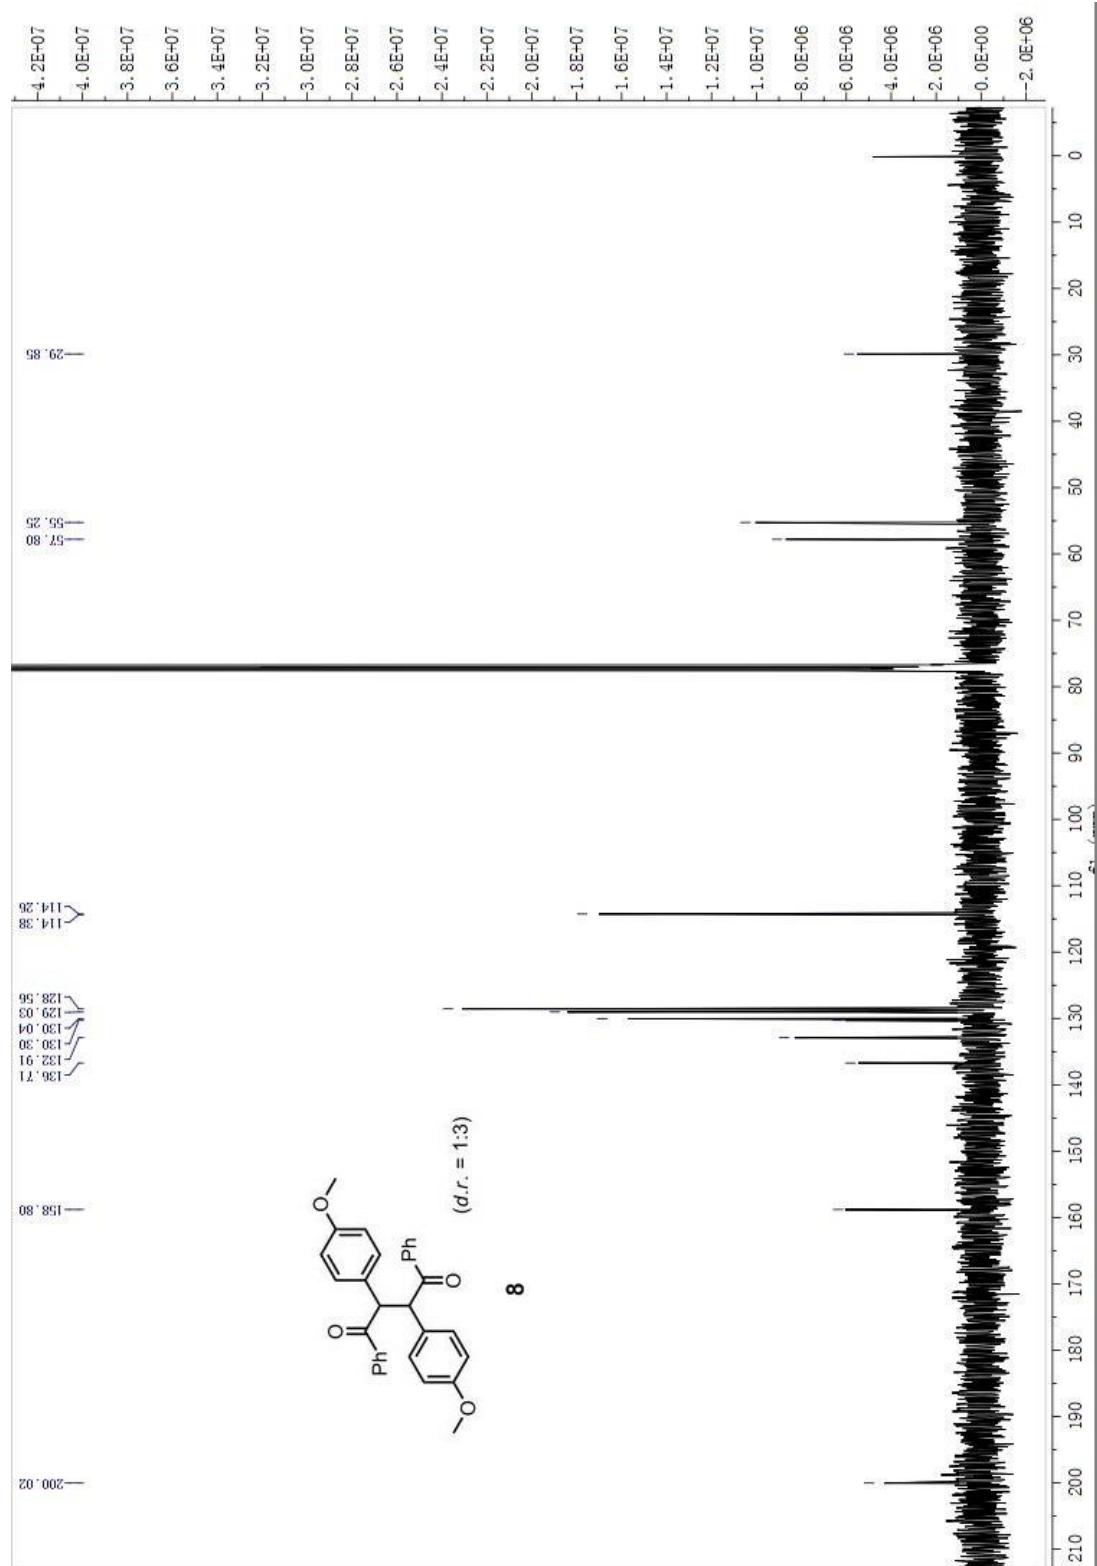



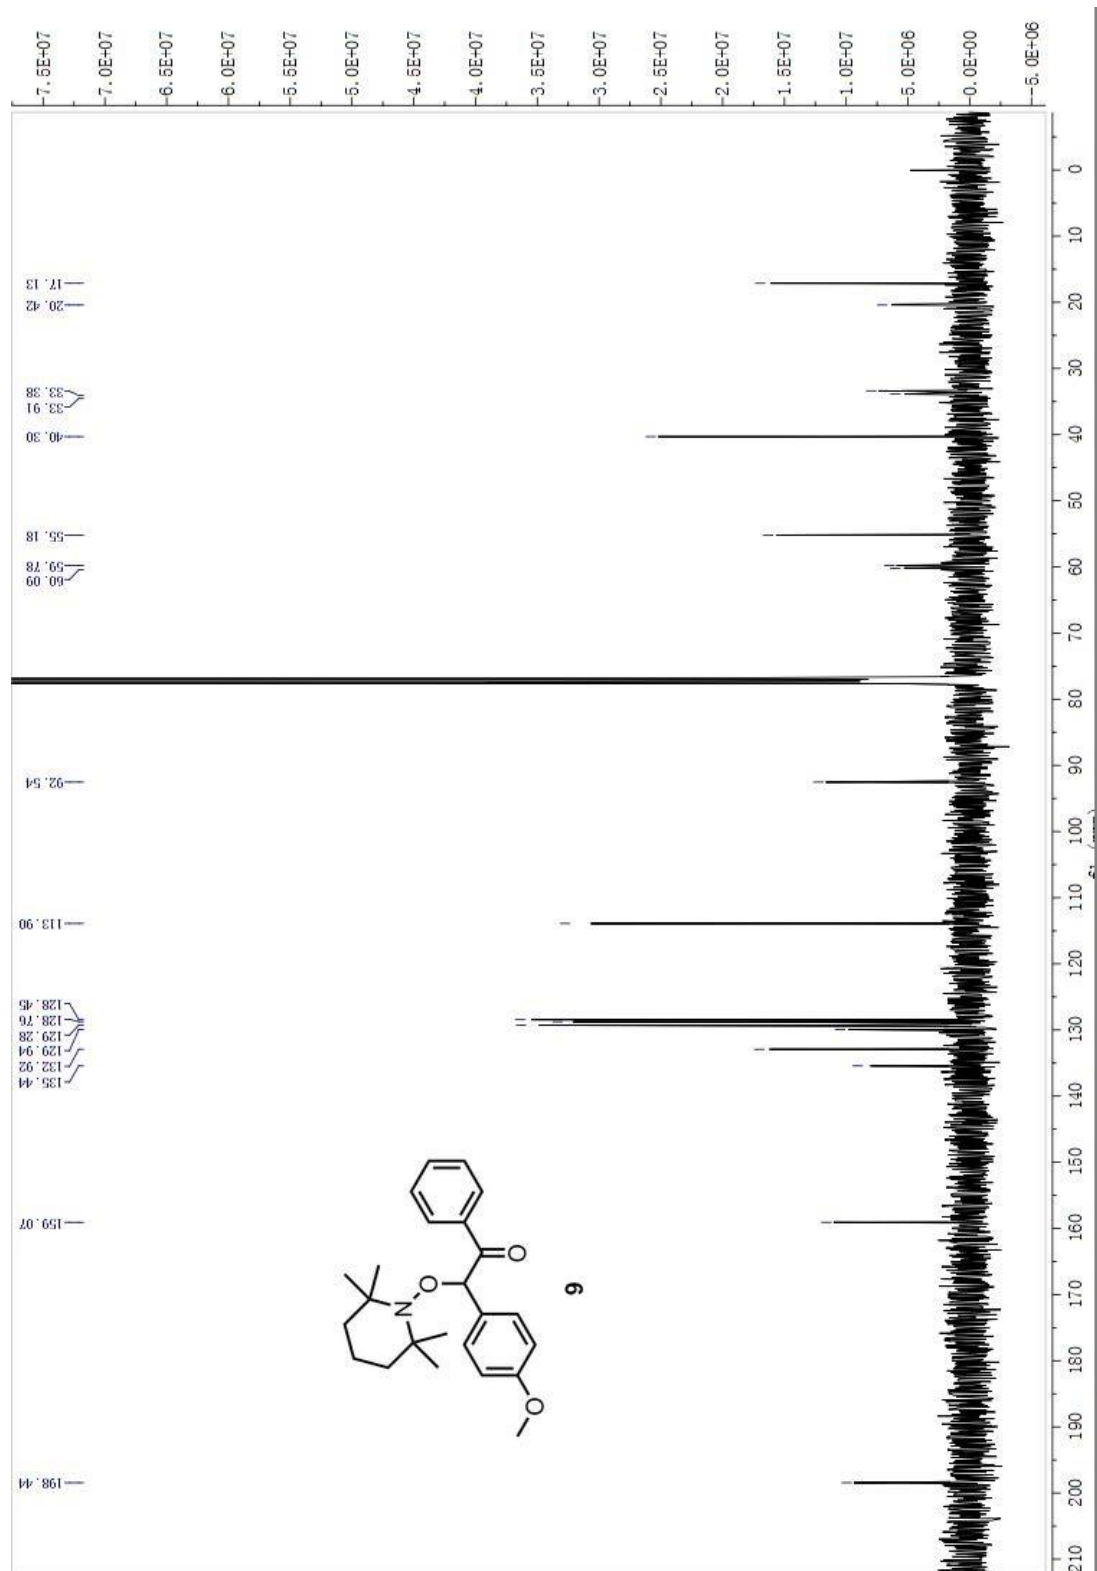



### COSY spectra for 2a

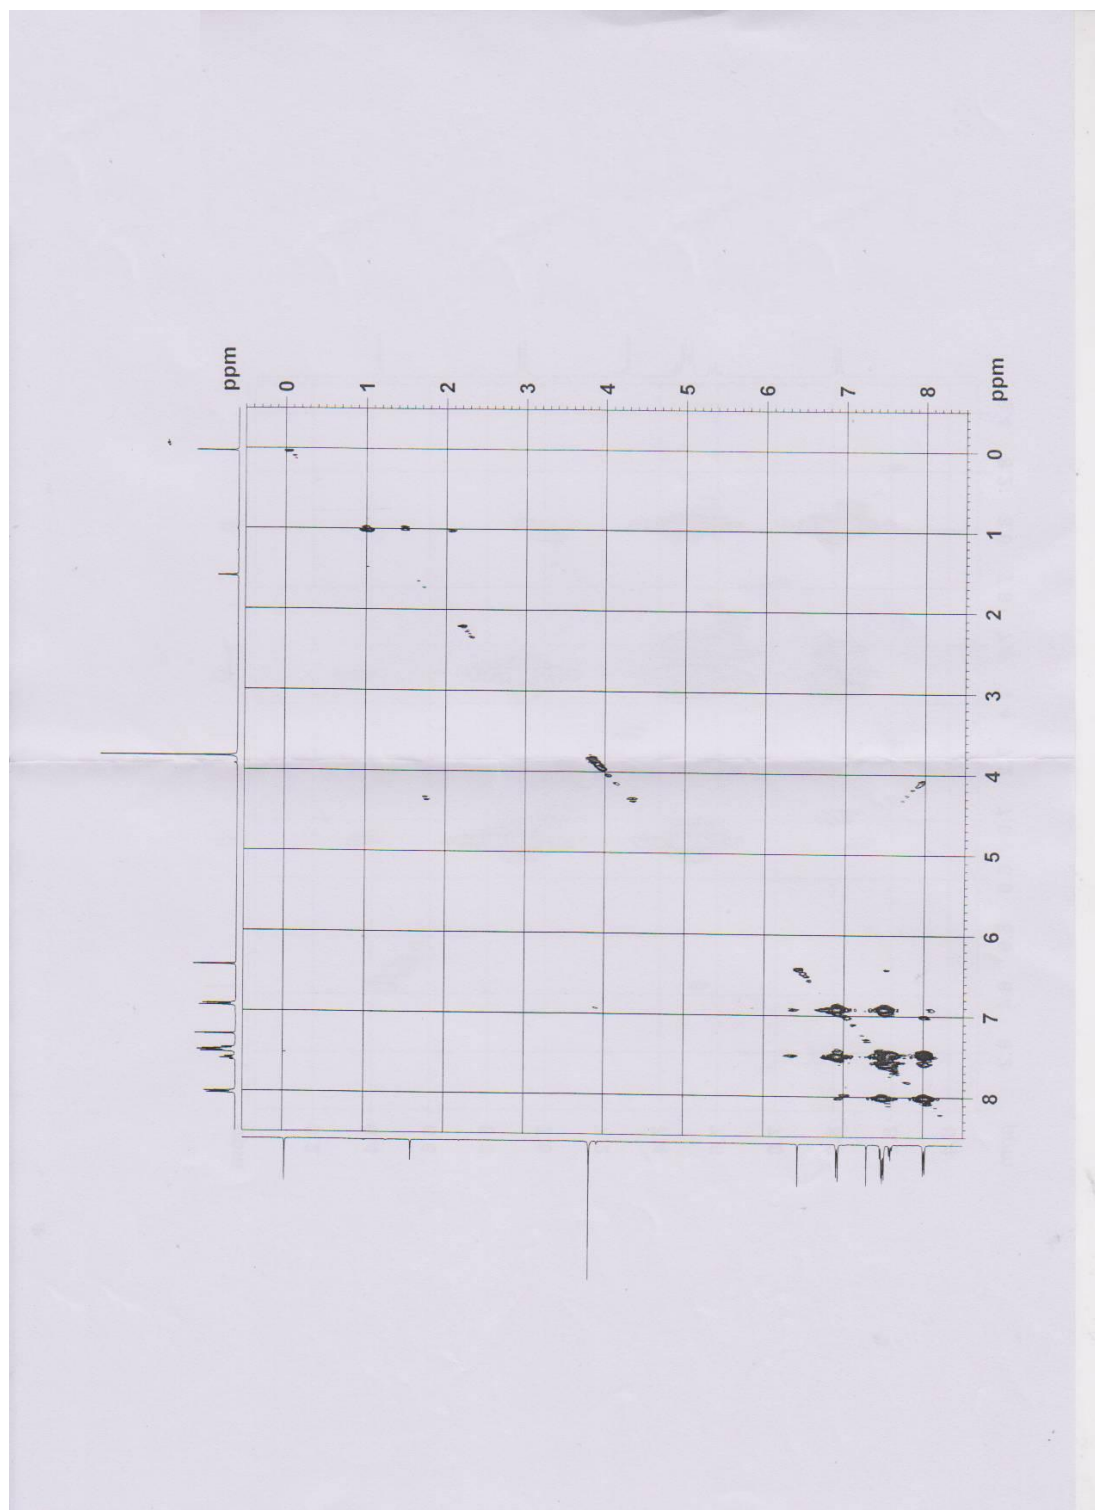

### HMQC spectra for 2a

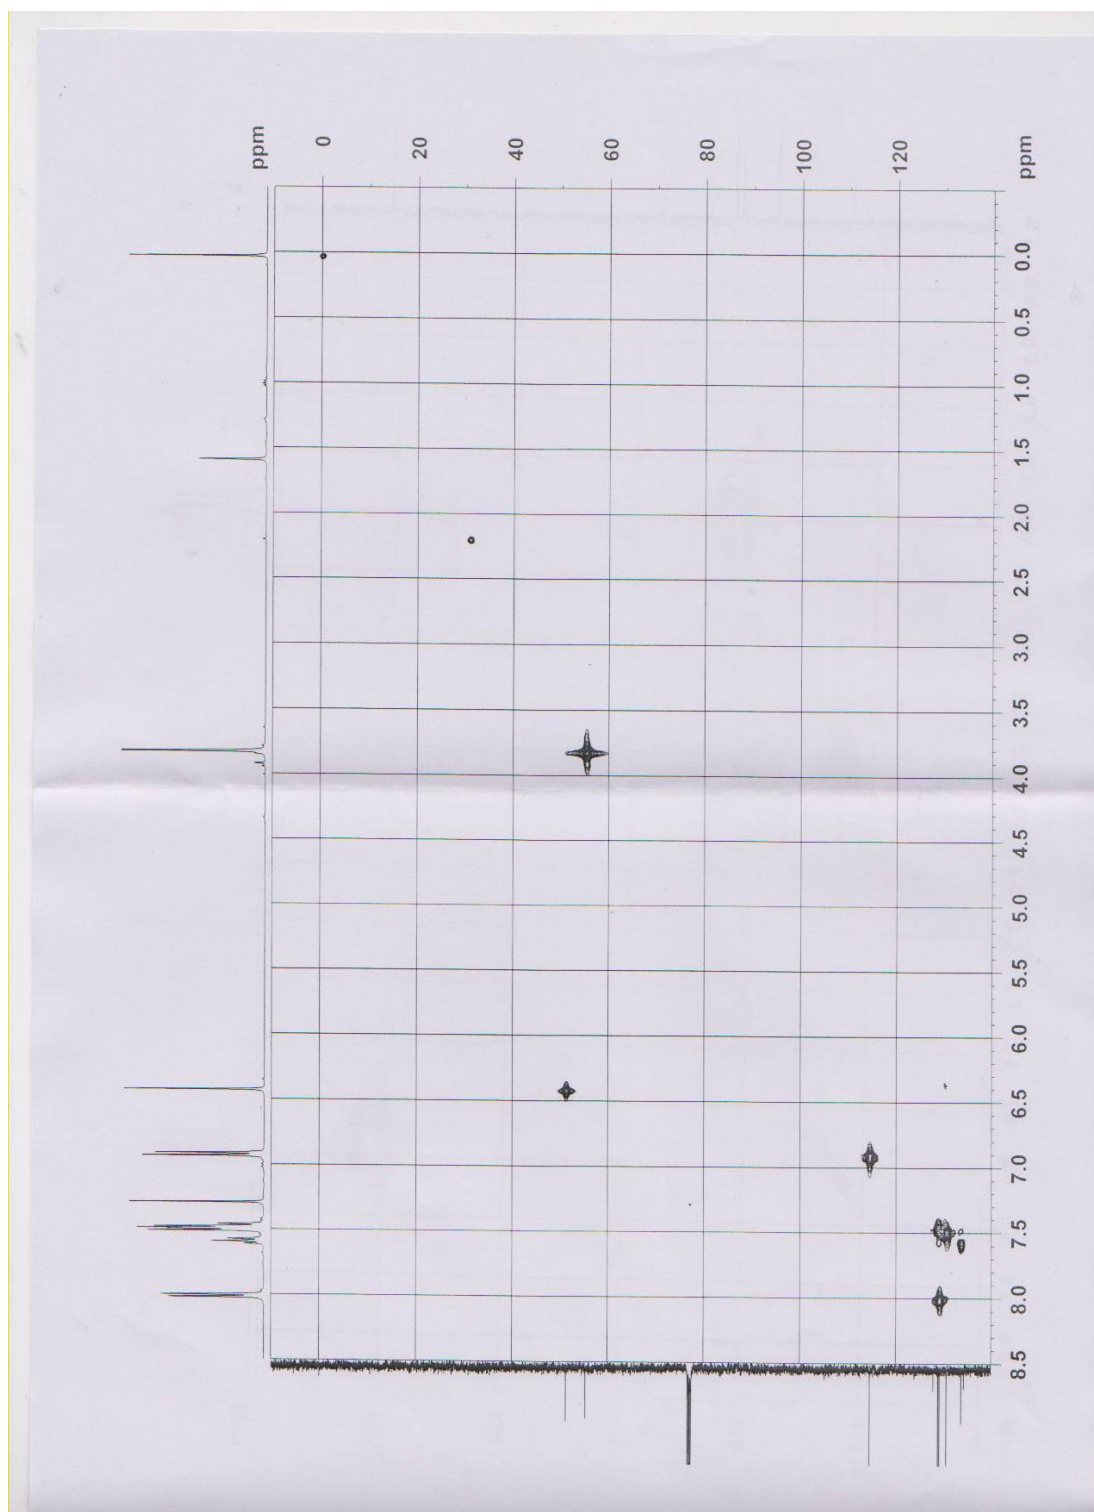

### HMBC spectra for 2a

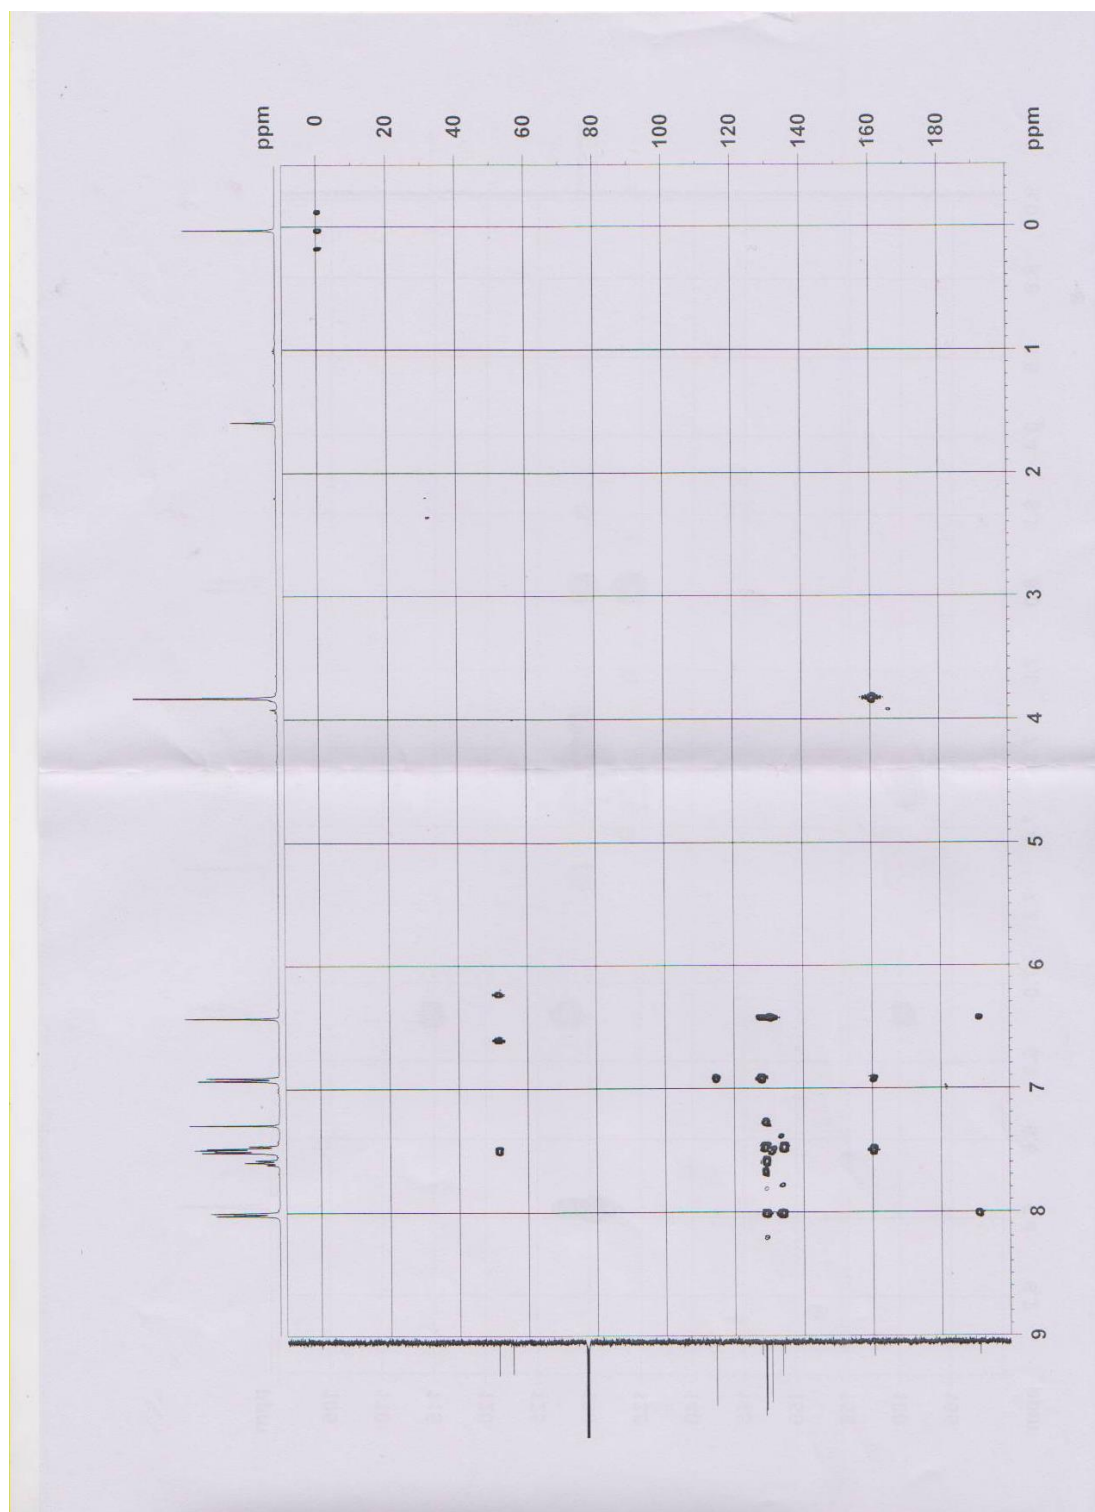

Supplement: c3ob41245h.pdf [file c3ob41245h.pdf]
